# Supplementary material for: Rotational spectroscopy of 2,4,6-cycloheptatriene-1-carbonitrile: facilitating the search for complex cyclic molecules in the ISM
Source: Royal Society of Chemistry journal article supplement (doi:10.1039/d4cp01899k), 2024-01-01
Supplement: d4cp01899k1.pdf [file d4cp01899k1.pdf]

Supplementary Information

**Rotational spectroscopy of**

**2,4,6-cycloheptatriene-1-carbonitrile: Facilitating the**

**search for complex cyclic molecules in the ISM**

Gayatri Batra,<sup>a,b</sup> Laura Pille,<sup>a</sup> Benjamin E. Arenas,<sup>a‡</sup> and Melanie Schnell<sup>a,b\*</sup>

July 3, 2024

<sup>a</sup> *Deutsches Elektronen-Synchrotron DESY, Notkestr. 85, 22607 Hamburg, Germany.*

<sup>b</sup> *Institute of Physical Chemistry, Max-Eyth-Str. 1, Christian-Albrechts-Universität zu Kiel, 24118 Kiel, Germany.*

<sup>‡</sup> *Present address: EaStCHEM School of Chemistry, University of Edinburgh, David Brewster Road, EH9 3FJ Edinburgh, United Kingdom.*

<sup>\*</sup> *Corresponding author, Email: melanie.schnell.desy.de.*

## Contents

|                                                                                                                                                                                                                      |           |
|----------------------------------------------------------------------------------------------------------------------------------------------------------------------------------------------------------------------|-----------|
| <b>S1 Experimental details</b>                                                                                                                                                                                       | <b>5</b>  |
| <b>S2 Rotational spectra of CHT-1-CN-1 including the nuclear hyperfine splitting patterns for selected transitions.</b>                                                                                              | <b>8</b>  |
| <b>S3 List of rotational transitions of the two conformers in the vibrational ground state.</b>                                                                                                                      | <b>9</b>  |
| S3.1 Linelist for CHT-1-CN-1 in the vibrational ground state in 2-26 GHz frequency range . . . . .                                                                                                                   | 9         |
| S3.2 Linelist for CHT-1-CN-1 in the vibrational ground state in 75-110 GHz frequency range . . . . .                                                                                                                 | 23        |
| S3.3 Linelist for CHT-1-CN-2 in vibrational ground state . . . . .                                                                                                                                                   | 63        |
| <b>S4 The experimental rotational constants for the heavy-atom isotopologues</b>                                                                                                                                     | <b>69</b> |
| <b>S5 List of rotational transitions for singly-substituted heavy-atom isotopologues of CHT-1-CN-1</b>                                                                                                               | <b>71</b> |
| S5.1 Measured frequencies and residuals (in MHz) for the rotational transitions of <sup>13</sup> C1 CHT-1-CN-1 in the low-frequency region (2-26 GHz) fit using SP-FIT/SPCAT suite of programs from Pickett. . . . . | 71        |
| S5.2 Measured frequencies and residuals (in MHz) for the rotational transitions of <sup>13</sup> C2 CHT-1-CN-1 in the low-frequency region (2-26 GHz) fit using SP-FIT/SPCAT suite of programs from Pickett. . . . . | 74        |

|           |                                                                                                                                                                                                                                       |           |
|-----------|---------------------------------------------------------------------------------------------------------------------------------------------------------------------------------------------------------------------------------------|-----------|
| S5.3      | Measured frequencies and residuals (in MHz) for the rotational transitions of $^{13}\text{C}_3$ CHT-1-CN-1 in the low-frequency region (2-26 GHz) fit using SP-FIT/SPCAT suite of programs from Pickett. . . . .                      | 78        |
| S5.4      | Measured frequencies and residuals (in MHz) for the rotational transitions of $^{13}\text{C}_4$ CHT-1-CN-1 in the low-frequency region (2-26 GHz) fit using SP-FIT/SPCAT suite of programs from Pickett. . . . .                      | 82        |
| S5.5      | Measured frequencies and residuals (in MHz) for the rotational transitions of $^{13}\text{C}_8$ CHT-1-CN-1 in the low-frequency region (2-26 GHz) fit using SP-FIT/SPCAT suite of programs from Pickett. . . . .                      | 87        |
| S5.6      | Measured frequencies and residuals (in MHz) for the rotational transitions of $^{15}\text{N}_7$ CHT-1-CN-1 in the low-frequency region (2-26 GHz) fit using SP-FIT/SPCAT suite of programs from Pickett. . . . .                      | 92        |
| <b>S6</b> | <b>The experimental and theoretical rotational constants for the observed six low-lying vibrationally excited states of CHT-1-CN-1.</b>                                                                                               | <b>93</b> |
| <b>S7</b> | <b>The list of assigned transitions for the observed six low-lying vibrationally excited states of CHT-1-CN-1.</b>                                                                                                                    | <b>95</b> |
| S7.1      | Measured frequencies and residuals (in MHz) for the rotational transitions of the vibrationally excited state $\nu_{42}$ of CHT-1-CN-1 in the frequency range of 75-110 GHz using SPFIT/SPCAT suite of programs from Pickett. . . . . | 95        |
| S7.2      | Measured frequencies and residuals (in MHz) for the rotational transitions of the vibrationally excited state $\nu_{41}$ of CHT-1-CN-1 in the frequency range of 75-110 GHz using SPFIT/SPCAT suite of programs from Pickett. . . . . | 126       |

- S7.3 Measured frequencies and residuals (in MHz) for the rotational transitions of the vibrationally excited state  $2\nu_{42}$  of CHT-1-CN-1 in the frequency range of 75-110 GHz using SPFIT/SPCAT suite of programs from Pickett. . 141
- S7.4 Measured frequencies and residuals (in MHz) for the rotational transitions of the vibrationally excited state  $\nu_{42} + \nu_{41}$  of CHT-1-CN-1 in the frequency range of 75-110 GHz using SPFIT/SPCAT suite of programs from Pickett. . 147
- S7.5 Measured frequencies and residuals (in MHz) for the rotational transitions of the vibrationally excited state  $2\nu_{38}$  of CHT-1-CN-1 in the frequency range of 75-110 GHz using SPFIT/SPCAT suite of programs from Pickett. . 152
- S7.6 Measured frequencies and residuals (in MHz) for the rotational transitions of the vibrationally excited state  $2\nu_{40}$  of CHT-1-CN-1 in the frequency range of 75-110 GHz using SPFIT/SPCAT suite of programs from Pickett. . 157

## S1.0 Experimental details

A brief description of the measurements performed in this work is given as follows: The COMPACT spectrometer Schmitz *et al.* (2012); Pérez *et al.* (2016); Fatima *et al.* (2020) was used to record the spectrum in the 2-8 GHz range. A series of eight chirped pulses covering 2-8 GHz (each of 4  $\mu$ s duration) is generated by the arbitrary waveform generator (AWG) and amplified with a 300 W traveling wave tube amplifier. These excitation pulses are then transmitted into the vacuum chamber containing a package of the supersonically expanded, cold molecules, and the interaction between the molecules and the microwave pulses induces a macroscopic polarization of the molecular ensemble. Eight chirped pulses per gas pulse combined with the gas-pulse repetition rate of 8 Hz led to an effective repetition rate of 64 Hz. Following each excitation, the resulting free induction decays (FIDs) of the macroscopic polarization were recorded for 40  $\mu$ s. In total, one million FIDs were co-added in the time domain, followed by the fast Fourier transformation into the frequency domain.

The K-band spectrometer, operating in the range of 18-26 GHz Fatima *et al.* (2020), uses the combination of the segmented approach and the multi-train method. The bandwidth of 8 GHz is split into smaller segments of 800 MHz, and the spectrum across the whole bandwidth is obtained by stitching these segments together Neill *et al.* (2013). The multi-train method utilizes multiple pulse trains per molecular gas pulse, increasing the effective repetition rate of the experiment. The AWG synthesizes 1.5  $\mu$ s long excitation pulses in the range of 7-3 GHz. These chirps are then frequency upconverted to 9-13 GHz and doubled to 18-26 GHz. For each gas pulse, the molecular ensemble is polarized by a series of three pulse trains. The multi-train setup combined with a gas-pulse repetition

rate of 10 Hz results in an effective repetition rate of 30 Hz. A total of 2.2 million FIDs were collected (each for a duration of 10  $\mu$ s), frequency down-converted, co-added, and converted into the frequency domain by fast Fourier transformation.

The W-band spectrometer (75-110 GHz) Arenas *et al.* (2017) also utilizes the segmented approach. The 35 GHz bandwidth is covered in segments of 720 MHz each. Among the different measurement modes available, the high dynamic range (HDR) mode was used for this experiment, which addresses each segment of 720 MHz by 30 chirps of 24 MHz bandwidth, thus reducing the spurious content in the collected spectrum. The AWG synthesizes 500 ns excitation pulses in the 1.5-2.3 GHz range, which is then frequency upconverted and multiplied through a series of mixing stages and an active multiplier chain ( $\times 6$ ) to produce the radiation in the millimeter-wave regime. A total of one million FIDs (each recorded for 4  $\mu$ s) were collected followed by conversion into the frequency domain by fast Fourier transformation.



## S2.0 Rotational spectra of CHT-1-CN-1 including the nuclear hyperfine splitting patterns for selected transitions.

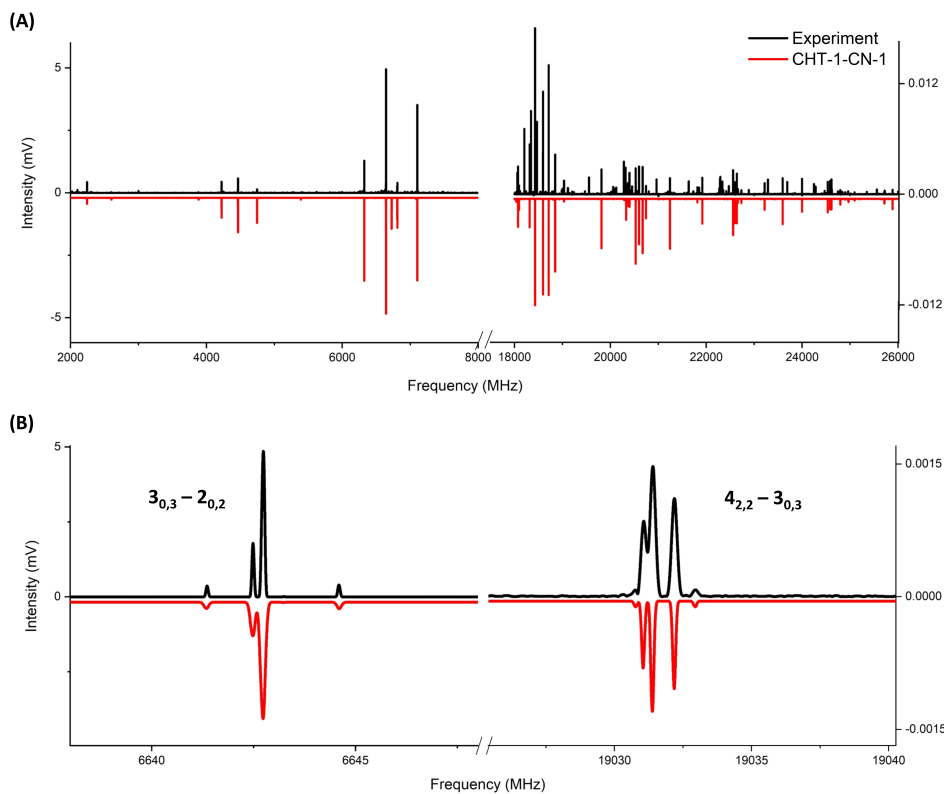

Figure S1: Panel (A) shows the rotational spectra of CHT-1-CN-1 in the frequency range of 2-8, 18-26 GHz. The black trace represents the experimental spectra, and the red trace is the simulated spectra based on the fitted rotational constants at 3 K. Panel (B) shows the zoom-in of the rotational transitions ( $J_{K_a, K_c} - J'_{K_a', K_c'}$ )  $3_{0,3} - 2_{0,2}$  and  $4_{2,2} - 3_{0,3}$  to highlight the hyperfine splitting observed due to the nuclear quadrupole coupling. To note: the left and right intensity axes correspond to the experiments performed in the different frequency regions.



### S3.0 List of rotational transitions of the two conformers in the vibrational ground state.

#### S3.1 Linelist for CHT-1-CN-1 in the vibrational ground state in 2-26 GHz frequency range

Measured frequencies and residuals (in MHz) for the rotational transitions of CHT-1-CN-1 in 2-26 GHz using SPFIT/SPCAT suite of programs from Pickett.

| $J$ | $K_a$ | $K_c$ | $F$ | $J'$ | $K'_a$ | $K'_c$ | $F'$ | Observed<br>Freq. (MHz) | Residuals<br>(MHz) |
|-----|-------|-------|-----|------|--------|--------|------|-------------------------|--------------------|
| 2   | 1     | 2     | 3   | 2    | 0      | 2      | 3    | 2046.851                | 0.0022             |
| 2   | 1     | 2     | 2   | 2    | 0      | 2      | 2    | 2047.538                | 0.0009             |
| 7   | 2     | 5     | 7   | 7    | 2      | 6      | 7    | 2199.84                 | -0.0039            |
| 7   | 2     | 5     | 8   | 7    | 2      | 6      | 8    | 2199.914                | 0.0042             |
| 7   | 2     | 5     | 6   | 7    | 2      | 6      | 6    | 2199.914                | -0.0053            |
| 1   | 0     | 1     | 1   | 0    | 0      | 0      | 1    | 2240.953                | 0.0044             |
| 1   | 0     | 1     | 2   | 0    | 0      | 0      | 1    | 2242.226                | 0.0027             |
| 1   | 0     | 1     | 0   | 0    | 0      | 0      | 1    | 2244.136                | -0.0005            |
| 1   | 1     | 1     | 2   | 1    | 0      | 1      | 2    | 2286.408                | -0.0004            |
| 1   | 1     | 1     | 0   | 1    | 0      | 1      | 1    | 2286.714                | 0.0046             |
| 1   | 1     | 1     | 1   | 1    | 0      | 1      | 2    | 2287.058                | 0.0012             |
| 1   | 1     | 1     | 2   | 1    | 0      | 1      | 1    | 2287.68                 | -0.003             |
| 1   | 1     | 1     | 1   | 1    | 0      | 1      | 1    | 2288.33                 | -0.0019            |

|   |   |   |   |   |   |   |   |          |         |
|---|---|---|---|---|---|---|---|----------|---------|
| 8 | 2 | 6 | 8 | 8 | 2 | 7 | 8 | 3364.258 | -0.0092 |
| 8 | 2 | 6 | 7 | 8 | 2 | 7 | 7 | 3364.33  | -0.0158 |
| 8 | 2 | 6 | 9 | 8 | 2 | 7 | 9 | 3364.33  | -0.0071 |
| 2 | 1 | 2 | 2 | 1 | 1 | 1 | 1 | 4222.177 | 0.0022  |
| 2 | 1 | 2 | 2 | 1 | 1 | 1 | 2 | 4222.829 | 0.0048  |
| 2 | 1 | 2 | 1 | 1 | 1 | 1 | 1 | 4223.223 | 0.0046  |
| 2 | 1 | 2 | 3 | 1 | 1 | 1 | 2 | 4223.498 | 0.0035  |
| 2 | 1 | 2 | 1 | 1 | 1 | 1 | 2 | 4223.867 | -0.0003 |
| 2 | 1 | 2 | 1 | 1 | 1 | 1 | 0 | 4224.844 | 0.0027  |
| 2 | 0 | 2 | 2 | 1 | 0 | 1 | 2 | 4461.7   | 0.0055  |
| 2 | 0 | 2 | 1 | 1 | 0 | 1 | 0 | 4461.896 | 0.0001  |
| 2 | 0 | 2 | 2 | 1 | 0 | 1 | 1 | 4462.971 | 0.0018  |
| 2 | 0 | 2 | 3 | 1 | 0 | 1 | 2 | 4463.054 | 0.0007  |
| 2 | 0 | 2 | 1 | 1 | 0 | 1 | 2 | 4463.808 | -0.0009 |
| 2 | 0 | 2 | 1 | 1 | 0 | 1 | 1 | 4465.08  | -0.0035 |
| 2 | 1 | 1 | 2 | 1 | 1 | 0 | 1 | 4743.743 | 0.0036  |
| 2 | 1 | 1 | 2 | 1 | 1 | 0 | 2 | 4744.37  | 0.0052  |
| 2 | 1 | 1 | 1 | 1 | 1 | 0 | 1 | 4744.836 | 0.0143  |
| 2 | 1 | 1 | 3 | 1 | 1 | 0 | 2 | 4745.071 | 0.0114  |
| 2 | 1 | 1 | 1 | 1 | 1 | 0 | 2 | 4745.446 | -0.001  |
| 2 | 1 | 1 | 1 | 1 | 1 | 0 | 0 | 4746.378 | -0.0079 |
| 1 | 1 | 0 | 2 | 0 | 0 | 0 | 1 | 4789.419 | 0.0022  |
| 1 | 1 | 0 | 1 | 0 | 0 | 0 | 1 | 4790.042 | -0.0009 |
| 9 | 2 | 7 | 9 | 9 | 2 | 8 | 9 | 4795.934 | -0.0089 |

|    |   |   |    |    |   |   |    |          |         |
|----|---|---|----|----|---|---|----|----------|---------|
| 9  | 2 | 7 | 10 | 9  | 2 | 8 | 10 | 4796.023 | 0.0116  |
| 9  | 2 | 7 | 8  | 9  | 2 | 8 | 8  | 4796.023 | 0.0039  |
| 3  | 1 | 3 | 3  | 2  | 1 | 2 | 3  | 6321.268 | 0.017   |
| 3  | 1 | 3 | 3  | 2  | 1 | 2 | 2  | 6321.943 | 0.0225  |
| 3  | 1 | 3 | 4  | 2  | 1 | 2 | 3  | 6322.315 | 0.0167  |
| 3  | 1 | 3 | 2  | 2  | 1 | 2 | 1  | 6322.315 | 0.023   |
| 3  | 1 | 3 | 4  | 2  | 1 | 2 | 3  | 6322.315 | 0.0167  |
| 3  | 1 | 3 | 2  | 2  | 1 | 2 | 3  | 6322.675 | 0.0096  |
| 10 | 2 | 8 | 10 | 10 | 2 | 9 | 10 | 6472.015 | -0.0009 |
| 10 | 2 | 8 | 9  | 10 | 2 | 9 | 9  | 6472.096 | 0.008   |
| 10 | 2 | 8 | 11 | 10 | 2 | 9 | 11 | 6472.096 | 0.0146  |
| 3  | 2 | 2 | 2  | 3  | 1 | 2 | 2  | 6482.057 | -0.0309 |
| 3  | 2 | 2 | 3  | 3  | 1 | 2 | 4  | 6482.457 | -0.0063 |
| 3  | 2 | 2 | 4  | 3  | 1 | 2 | 3  | 6483.528 | -0.0085 |
| 3  | 0 | 3 | 3  | 2  | 0 | 2 | 3  | 6641.355 | 0.0046  |
| 3  | 0 | 3 | 3  | 2  | 0 | 2 | 3  | 6641.355 | 0.0046  |
| 3  | 0 | 3 | 2  | 2  | 0 | 2 | 1  | 6642.484 | 0.0014  |
| 3  | 0 | 3 | 4  | 2  | 0 | 2 | 3  | 6642.737 | -0.012  |
| 3  | 0 | 3 | 3  | 2  | 0 | 2 | 2  | 6642.737 | 0.0275  |
| 3  | 0 | 3 | 2  | 2  | 0 | 2 | 3  | 6643.237 | -0.0019 |
| 3  | 0 | 3 | 2  | 2  | 0 | 2 | 2  | 6644.593 | -0.0044 |
| 3  | 2 | 2 | 3  | 2  | 2 | 1 | 2  | 6724.969 | 0.0098  |
| 3  | 2 | 2 | 4  | 2  | 2 | 1 | 3  | 6726.314 | -0.0109 |
| 3  | 2 | 2 | 2  | 2  | 2 | 1 | 1  | 6727.075 | -0.0099 |

|   |   |   |   |   |   |   |   |          |         |
|---|---|---|---|---|---|---|---|----------|---------|
| 3 | 2 | 1 | 3 | 2 | 2 | 0 | 2 | 6808.279 | 0.0028  |
| 3 | 2 | 1 | 4 | 2 | 2 | 0 | 3 | 6809.662 | 0.0089  |
| 3 | 2 | 1 | 2 | 2 | 2 | 0 | 1 | 6810.423 | 0.0083  |
| 2 | 2 | 1 | 3 | 2 | 1 | 1 | 3 | 6859.719 | 0.0032  |
| 3 | 1 | 2 | 3 | 2 | 1 | 1 | 3 | 7102.509 | 0.0043  |
| 3 | 1 | 2 | 3 | 2 | 1 | 1 | 2 | 7103.205 | 0.005   |
| 3 | 1 | 2 | 4 | 2 | 1 | 1 | 3 | 7103.58  | 0.0029  |
| 3 | 1 | 2 | 2 | 2 | 1 | 1 | 1 | 7103.58  | 0.0141  |
| 3 | 1 | 2 | 2 | 2 | 1 | 1 | 3 | 7103.957 | 0.0039  |
| 3 | 1 | 2 | 2 | 2 | 1 | 1 | 2 | 7104.653 | 0.0037  |
| 2 | 1 | 1 | 1 | 1 | 0 | 1 | 0 | 7290.731 | 0.0029  |
| 2 | 1 | 1 | 2 | 1 | 0 | 1 | 2 | 7291.556 | -0.0028 |
| 2 | 1 | 1 | 3 | 1 | 0 | 1 | 2 | 7292.254 | 0       |
| 2 | 1 | 1 | 2 | 1 | 0 | 1 | 1 | 7292.831 | -0.0025 |
| 2 | 1 | 1 | 1 | 1 | 0 | 1 | 1 | 7293.914 | -0.0018 |
| 2 | 2 | 0 | 1 | 2 | 1 | 2 | 1 | 7661.994 | -0.0037 |
| 2 | 2 | 0 | 3 | 2 | 1 | 2 | 3 | 7663.12  | -0.0058 |
| 2 | 2 | 0 | 2 | 2 | 1 | 2 | 2 | 7665.145 | -0.01   |
| 4 | 1 | 4 | 4 | 3 | 1 | 3 | 4 | 8406.226 | 0.0074  |
| 4 | 1 | 4 | 4 | 3 | 1 | 3 | 3 | 8407.267 | 0.0011  |
| 4 | 1 | 4 | 5 | 3 | 1 | 3 | 4 | 8407.429 | -0.0028 |
| 4 | 1 | 4 | 3 | 3 | 1 | 3 | 2 | 8407.429 | 0.052   |
| 4 | 1 | 4 | 3 | 3 | 1 | 3 | 3 | 8408.784 | -0.0076 |
| 4 | 0 | 4 | 4 | 3 | 0 | 3 | 4 | 8763.869 | 0.0011  |

|   |   |   |   |   |   |   |   |          |         |
|---|---|---|---|---|---|---|---|----------|---------|
| 4 | 0 | 4 | 3 | 3 | 0 | 3 | 2 | 8765.162 | 0.0026  |
| 4 | 0 | 4 | 5 | 3 | 0 | 3 | 4 | 8765.292 | 0.0075  |
| 4 | 0 | 4 | 4 | 3 | 0 | 3 | 3 | 8765.292 | 0.0261  |
| 4 | 0 | 4 | 3 | 3 | 0 | 3 | 3 | 8767.053 | 0.0059  |
| 4 | 2 | 3 | 4 | 3 | 2 | 2 | 3 | 8951.203 | 0.0067  |
| 4 | 2 | 3 | 5 | 3 | 2 | 2 | 4 | 8951.78  | 0.005   |
| 4 | 2 | 3 | 3 | 3 | 2 | 2 | 2 | 8951.927 | 0.0038  |
| 4 | 3 | 2 | 4 | 3 | 3 | 1 | 3 | 9006.149 | -0.0012 |
| 4 | 3 | 2 | 5 | 3 | 3 | 1 | 4 | 9007.413 | -0.0035 |
| 4 | 3 | 2 | 3 | 3 | 3 | 1 | 2 | 9007.903 | -0.004  |
| 4 | 3 | 1 | 4 | 3 | 3 | 0 | 3 | 9012.524 | 0.0022  |
| 4 | 3 | 1 | 5 | 3 | 3 | 0 | 4 | 9013.788 | -0.0022 |
| 4 | 3 | 1 | 3 | 3 | 3 | 0 | 2 | 9014.277 | -0.0041 |
| 4 | 2 | 2 | 4 | 3 | 2 | 1 | 3 | 9153.91  | -0.0046 |
| 4 | 2 | 2 | 5 | 3 | 2 | 1 | 4 | 9154.496 | -0.0102 |
| 4 | 2 | 2 | 3 | 3 | 2 | 1 | 2 | 9154.653 | -0.0038 |
| 4 | 1 | 3 | 4 | 3 | 1 | 2 | 3 | 9444.033 | 0.0126  |
| 4 | 1 | 3 | 3 | 3 | 1 | 2 | 2 | 9444.182 | 0.0546  |
| 4 | 1 | 3 | 5 | 3 | 1 | 2 | 4 | 9444.182 | -0.0027 |
| 8 | 7 | 1 | 8 | 7 | 7 | 0 | 7 | 18000.83 | -0.0416 |
| 8 | 7 | 2 | 8 | 7 | 7 | 1 | 7 | 18000.83 | -0.0415 |
| 8 | 7 | 2 | 9 | 7 | 7 | 1 | 8 | 18001.73 | -0.0135 |
| 8 | 7 | 1 | 9 | 7 | 7 | 0 | 8 | 18001.73 | -0.0135 |
| 8 | 6 | 2 | 8 | 7 | 6 | 1 | 7 | 18015.01 | -0.0511 |

|   |   |   |   |   |   |   |   |          |         |
|---|---|---|---|---|---|---|---|----------|---------|
| 8 | 6 | 3 | 8 | 7 | 6 | 2 | 7 | 18015.01 | -0.0464 |
| 8 | 6 | 3 | 9 | 7 | 6 | 2 | 8 | 18015.64 | -0.0583 |
| 8 | 6 | 2 | 9 | 7 | 6 | 1 | 8 | 18015.64 | -0.063  |
| 8 | 5 | 4 | 8 | 7 | 5 | 3 | 7 | 18038.74 | -0.0361 |
| 8 | 5 | 4 | 8 | 7 | 5 | 3 | 8 | 18039.31 | 0.0299  |
| 8 | 5 | 4 | 7 | 7 | 5 | 3 | 6 | 18039.31 | 0.0193  |
| 8 | 5 | 3 | 7 | 7 | 5 | 2 | 6 | 18039.64 | -0.0163 |
| 8 | 5 | 3 | 8 | 7 | 5 | 2 | 8 | 18039.64 | -0.0057 |
| 8 | 5 | 3 | 9 | 7 | 5 | 2 | 8 | 18039.64 | 0.0507  |
| 8 | 3 | 6 | 8 | 7 | 3 | 5 | 8 | 18072.7  | -0.0128 |
| 8 | 3 | 6 | 9 | 7 | 3 | 5 | 8 | 18073.64 | -0.0292 |
| 8 | 3 | 6 | 7 | 7 | 3 | 5 | 6 | 18073.64 | -0.0357 |
| 8 | 3 | 6 | 7 | 7 | 3 | 5 | 7 | 18074.54 | -0.0366 |
| 8 | 4 | 5 | 8 | 7 | 4 | 4 | 7 | 18077.83 | -0.015  |
| 8 | 4 | 5 | 9 | 7 | 4 | 4 | 8 | 18078.15 | 0.0131  |
| 8 | 4 | 5 | 7 | 7 | 4 | 4 | 6 | 18078.15 | -0.0194 |
| 8 | 4 | 4 | 8 | 7 | 4 | 3 | 7 | 18092.2  | -0.0099 |
| 8 | 4 | 4 | 9 | 7 | 4 | 3 | 8 | 18092.52 | 0.0175  |
| 8 | 4 | 4 | 7 | 7 | 4 | 3 | 6 | 18092.52 | -0.0152 |
| 4 | 3 | 2 | 3 | 4 | 1 | 3 | 3 | 18143.01 | -0.004  |
| 4 | 3 | 2 | 5 | 4 | 1 | 3 | 5 | 18143.46 | 0.0029  |
| 4 | 3 | 2 | 4 | 4 | 1 | 3 | 4 | 18145.2  | -0.0052 |
| 8 | 3 | 5 | 8 | 7 | 3 | 4 | 8 | 18314.82 | 0.0314  |
| 8 | 3 | 5 | 9 | 7 | 3 | 4 | 8 | 18315.74 | -0.0219 |

|   |   |   |    |   |   |   |   |          |         |
|---|---|---|----|---|---|---|---|----------|---------|
| 8 | 3 | 5 | 7  | 7 | 3 | 4 | 6 | 18315.74 | -0.0294 |
| 8 | 3 | 5 | 7  | 7 | 3 | 4 | 7 | 18316.69 | 0.0029  |
| 8 | 1 | 7 | 8  | 7 | 1 | 6 | 8 | 18428.67 | 0.0092  |
| 8 | 1 | 7 | 8  | 7 | 1 | 6 | 7 | 18430.09 | 0.0215  |
| 8 | 1 | 7 | 7  | 7 | 1 | 6 | 6 | 18430.09 | 0.0312  |
| 8 | 1 | 7 | 7  | 7 | 1 | 6 | 7 | 18431.68 | 0.0225  |
| 3 | 3 | 1 | 2  | 3 | 1 | 2 | 2 | 18579.26 | 0.0214  |
| 3 | 3 | 1 | 4  | 3 | 1 | 2 | 4 | 18580.24 | 0.0086  |
| 3 | 3 | 1 | 3  | 3 | 1 | 2 | 3 | 18583.05 | -0.0171 |
| 9 | 1 | 9 | 9  | 8 | 1 | 8 | 9 | 18594.71 | 0.028   |
| 9 | 1 | 9 | 10 | 8 | 1 | 8 | 9 | 18596.12 | -0.0016 |
| 9 | 1 | 9 | 9  | 8 | 1 | 8 | 8 | 18596.12 | 0.0156  |
| 9 | 1 | 9 | 8  | 8 | 1 | 8 | 7 | 18596.12 | 0.0165  |
| 9 | 1 | 9 | 8  | 8 | 1 | 8 | 8 | 18597.69 | 0.0043  |
| 9 | 0 | 9 | 9  | 8 | 0 | 8 | 9 | 18710.98 | 0.0049  |
| 9 | 0 | 9 | 8  | 8 | 0 | 8 | 7 | 18712.43 | 0.0336  |
| 9 | 0 | 9 | 10 | 8 | 0 | 8 | 9 | 18712.43 | 0.0139  |
| 9 | 0 | 9 | 9  | 8 | 0 | 8 | 8 | 18712.43 | 0.02    |
| 9 | 0 | 9 | 8  | 8 | 0 | 8 | 8 | 18714.04 | 0.0245  |
| 3 | 3 | 0 | 4  | 2 | 2 | 0 | 3 | 18804.13 | 0.0306  |
| 3 | 3 | 0 | 3  | 2 | 2 | 0 | 2 | 18804.51 | 0.0031  |
| 3 | 3 | 1 | 2  | 2 | 2 | 1 | 2 | 18822.08 | -0.0296 |
| 3 | 3 | 1 | 4  | 2 | 2 | 1 | 3 | 18824.12 | 0.0318  |
| 3 | 3 | 1 | 3  | 2 | 2 | 1 | 2 | 18824.51 | 0.0152  |

|   |   |   |    |   |   |   |   |          |         |
|---|---|---|----|---|---|---|---|----------|---------|
| 3 | 3 | 1 | 3  | 2 | 2 | 1 | 3 | 18825.85 | -0.0107 |
| 8 | 2 | 6 | 8  | 7 | 2 | 5 | 8 | 18847.18 | 0.0075  |
| 8 | 2 | 6 | 9  | 7 | 2 | 5 | 8 | 18848.5  | 0.0177  |
| 8 | 2 | 6 | 7  | 7 | 2 | 5 | 7 | 18849.89 | 0.0175  |
| 4 | 2 | 2 | 4  | 3 | 0 | 3 | 4 | 19030.75 | -0.022  |
| 4 | 2 | 2 | 3  | 3 | 0 | 3 | 2 | 19031.06 | 0.0123  |
| 4 | 2 | 2 | 5  | 3 | 0 | 3 | 4 | 19031.4  | 0.0102  |
| 4 | 2 | 2 | 4  | 3 | 0 | 3 | 3 | 19032.18 | 0.0085  |
| 4 | 2 | 2 | 3  | 3 | 0 | 3 | 3 | 19032.95 | 0.0067  |
| 5 | 2 | 4 | 6  | 4 | 1 | 4 | 5 | 19753.77 | -0.0171 |
| 5 | 2 | 4 | 5  | 4 | 1 | 4 | 4 | 19754.12 | 0.0043  |
| 9 | 2 | 8 | 10 | 8 | 2 | 7 | 9 | 19812.11 | -0.0318 |
| 9 | 2 | 8 | 9  | 8 | 2 | 7 | 8 | 19812.11 | 0.0202  |
| 9 | 2 | 8 | 8  | 8 | 2 | 7 | 7 | 19812.11 | -0.02   |
| 9 | 6 | 4 | 9  | 8 | 6 | 3 | 8 | 20282.51 | -0.0179 |
| 9 | 6 | 3 | 9  | 8 | 6 | 2 | 8 | 20282.51 | -0.0398 |
| 9 | 6 | 3 | 8  | 8 | 6 | 2 | 9 | 20283.02 | 0.051   |
| 9 | 6 | 4 | 8  | 8 | 6 | 3 | 7 | 20283.02 | -0.0214 |
| 9 | 6 | 3 | 10 | 8 | 6 | 2 | 9 | 20283.02 | 0.018   |
| 9 | 6 | 3 | 8  | 8 | 6 | 2 | 7 | 20283.02 | -0.0433 |
| 9 | 6 | 4 | 10 | 8 | 6 | 3 | 9 | 20283.02 | 0.0398  |
| 9 | 5 | 5 | 9  | 8 | 5 | 4 | 8 | 20316    | -0.0179 |
| 9 | 5 | 5 | 10 | 8 | 5 | 4 | 9 | 20316.34 | 0.0042  |
| 9 | 5 | 5 | 8  | 8 | 5 | 4 | 8 | 20316.34 | 0.0296  |



|    |   |    |    |   |   |   |    |          |         |
|----|---|----|----|---|---|---|----|----------|---------|
| 9  | 5 | 5  | 8  | 8 | 5 | 4 | 7  | 20316.34 | -0.0321 |
| 9  | 5 | 5  | 8  | 8 | 5 | 4 | 9  | 20316.34 | -0.0254 |
| 9  | 5 | 4  | 9  | 8 | 5 | 3 | 8  | 20317.2  | -0.0059 |
| 9  | 5 | 4  | 10 | 8 | 5 | 3 | 9  | 20317.54 | 0.0126  |
| 9  | 5 | 4  | 8  | 8 | 5 | 3 | 8  | 20317.54 | 0.0379  |
| 9  | 5 | 4  | 8  | 8 | 5 | 3 | 7  | 20317.54 | -0.0238 |
| 9  | 5 | 4  | 8  | 8 | 5 | 3 | 9  | 20317.54 | -0.017  |
| 9  | 3 | 7  | 9  | 8 | 3 | 6 | 8  | 20328.92 | -0.071  |
| 9  | 3 | 7  | 8  | 8 | 3 | 6 | 7  | 20329.13 | 0.0232  |
| 9  | 3 | 7  | 10 | 8 | 3 | 6 | 9  | 20329.13 | 0.0228  |
| 9  | 4 | 6  | 8  | 8 | 4 | 5 | 7  | 20366.29 | -0.047  |
| 9  | 4 | 6  | 10 | 8 | 4 | 5 | 9  | 20366.29 | -0.0312 |
| 9  | 4 | 5  | 9  | 8 | 4 | 4 | 9  | 20399.39 | -0.0313 |
| 9  | 4 | 5  | 9  | 8 | 4 | 4 | 8  | 20399.92 | -0.019  |
| 9  | 4 | 5  | 10 | 8 | 4 | 4 | 9  | 20400.11 | -0.0397 |
| 9  | 4 | 5  | 8  | 8 | 4 | 4 | 7  | 20400.11 | -0.0556 |
| 9  | 1 | 8  | 8  | 8 | 1 | 7 | 7  | 20527.7  | -0.0148 |
| 9  | 1 | 8  | 10 | 8 | 1 | 7 | 9  | 20527.7  | -0.0343 |
| 9  | 1 | 8  | 9  | 8 | 1 | 7 | 8  | 20527.7  | -0.0287 |
| 10 | 1 | 10 | 10 | 9 | 1 | 9 | 10 | 20595.25 | -0.0356 |
| 10 | 1 | 10 | 11 | 9 | 1 | 9 | 10 | 20596.69 | -0.0419 |
| 10 | 1 | 10 | 9  | 9 | 1 | 9 | 8  | 20596.69 | -0.0271 |
| 10 | 1 | 10 | 10 | 9 | 1 | 9 | 9  | 20596.69 | -0.0289 |
| 10 | 1 | 10 | 9  | 9 | 1 | 9 | 9  | 20598.3  | -0.0133 |

|    |   |    |    |   |   |   |    |          |         |
|----|---|----|----|---|---|---|----|----------|---------|
| 10 | 0 | 10 | 10 | 9 | 0 | 9 | 9  | 20672.39 | -0.0327 |
| 10 | 0 | 10 | 9  | 9 | 0 | 9 | 8  | 20672.39 | -0.0237 |
| 10 | 0 | 10 | 11 | 9 | 0 | 9 | 10 | 20672.39 | -0.0393 |
| 9  | 3 | 6  | 8  | 8 | 3 | 5 | 7  | 20743.25 | -0.0499 |
| 9  | 3 | 6  | 9  | 8 | 3 | 5 | 8  | 20743.25 | 0.0798  |
| 9  | 3 | 6  | 10 | 8 | 3 | 5 | 9  | 20743.25 | -0.0493 |
| 4  | 3 | 1  | 3  | 4 | 1 | 4 | 3  | 20750.83 | -0.0105 |
| 4  | 3 | 1  | 5  | 4 | 1 | 4 | 5  | 20751.26 | -0.0286 |
| 4  | 3 | 1  | 4  | 4 | 1 | 4 | 4  | 20752.98 | -0.015  |
| 4  | 3 | 1  | 5  | 3 | 2 | 1 | 4  | 21008.25 | 0.0151  |
| 4  | 3 | 1  | 5  | 3 | 2 | 1 | 4  | 21008.25 | 0.0151  |
| 4  | 3 | 1  | 4  | 3 | 2 | 1 | 4  | 21008.75 | 0.016   |
| 4  | 3 | 1  | 4  | 3 | 2 | 1 | 3  | 21008.75 | -0.0023 |
| 4  | 3 | 1  | 4  | 3 | 2 | 1 | 3  | 21008.75 | -0.0023 |
| 4  | 3 | 1  | 4  | 3 | 2 | 1 | 4  | 21008.75 | 0.016   |
| 4  | 3 | 2  | 3  | 3 | 2 | 2 | 4  | 21105.05 | -0.0069 |
| 4  | 3 | 2  | 3  | 3 | 2 | 2 | 2  | 21105.05 | -0.0064 |
| 4  | 3 | 2  | 3  | 3 | 2 | 2 | 3  | 21105.05 | -0.0068 |
| 4  | 3 | 2  | 5  | 3 | 2 | 2 | 4  | 21105.2  | 0.0221  |
| 4  | 3 | 2  | 4  | 3 | 2 | 2 | 3  | 21105.7  | 0.0119  |
| 4  | 3 | 2  | 4  | 3 | 2 | 2 | 4  | 21105.7  | 0.0118  |
| 4  | 3 | 2  | 4  | 3 | 2 | 2 | 3  | 21105.7  | 0.0119  |
| 4  | 3 | 2  | 4  | 3 | 2 | 2 | 4  | 21105.7  | 0.0118  |
| 9  | 2 | 7  | 9  | 8 | 2 | 6 | 8  | 21243.76 | -0.0026 |

|    |   |   |    |   |   |   |    |          |         |
|----|---|---|----|---|---|---|----|----------|---------|
| 9  | 2 | 7 | 10 | 8 | 2 | 6 | 9  | 21243.76 | -0.0544 |
| 9  | 2 | 7 | 8  | 8 | 2 | 6 | 7  | 21243.76 | -0.0416 |
| 5  | 3 | 2 | 4  | 5 | 1 | 5 | 4  | 21568.69 | 0.0056  |
| 5  | 3 | 2 | 6  | 5 | 1 | 5 | 6  | 21568.89 | -0.0267 |
| 5  | 3 | 2 | 5  | 5 | 1 | 5 | 5  | 21570.07 | 0.0149  |
| 5  | 2 | 3 | 5  | 4 | 0 | 4 | 5  | 21813.37 | 0.037   |
| 5  | 2 | 3 | 6  | 4 | 0 | 4 | 5  | 21814.23 | -0.0257 |
| 5  | 2 | 3 | 5  | 4 | 0 | 4 | 4  | 21814.77 | 0.014   |
| 5  | 2 | 3 | 4  | 4 | 0 | 4 | 4  | 21815.87 | 0.0006  |
| 10 | 2 | 9 | 10 | 9 | 2 | 8 | 9  | 21915.88 | 0.0136  |
| 10 | 2 | 9 | 11 | 9 | 2 | 8 | 10 | 21915.88 | -0.0236 |
| 10 | 2 | 9 | 9  | 9 | 2 | 8 | 8  | 21915.88 | -0.0127 |
| 10 | 7 | 3 | 10 | 9 | 7 | 2 | 9  | 22527.89 | -0.0408 |
| 10 | 7 | 4 | 10 | 9 | 7 | 3 | 9  | 22527.89 | -0.0397 |
| 10 | 7 | 3 | 11 | 9 | 7 | 2 | 10 | 22528.36 | -0.0179 |
| 10 | 7 | 4 | 11 | 9 | 7 | 3 | 10 | 22528.36 | -0.0168 |
| 10 | 7 | 4 | 9  | 9 | 7 | 3 | 8  | 22528.36 | -0.0728 |
| 10 | 6 | 4 | 10 | 9 | 6 | 3 | 9  | 22555.43 | -0.0864 |
| 10 | 6 | 5 | 9  | 9 | 6 | 4 | 9  | 22555.43 | -0.0448 |
| 10 | 6 | 5 | 10 | 9 | 6 | 4 | 9  | 22555.43 | -0.0048 |
| 10 | 6 | 4 | 10 | 9 | 6 | 3 | 10 | 22555.77 | -0.0368 |
| 10 | 6 | 4 | 9  | 9 | 6 | 3 | 10 | 22555.77 | -0.0768 |
| 10 | 6 | 5 | 11 | 9 | 6 | 4 | 10 | 22555.77 | 0.0086  |
| 10 | 6 | 5 | 9  | 9 | 6 | 4 | 10 | 22555.77 | 0.0048  |

|    |   |    |    |    |   |    |    |          |         |
|----|---|----|----|----|---|----|----|----------|---------|
| 10 | 6 | 4  | 11 | 9  | 6 | 3  | 10 | 22555.77 | -0.073  |
| 10 | 6 | 5  | 9  | 9  | 6 | 4  | 8  | 22555.77 | -0.0282 |
| 10 | 1 | 9  | 11 | 9  | 1 | 8  | 10 | 22557.41 | -0.0365 |
| 10 | 1 | 9  | 10 | 9  | 1 | 8  | 9  | 22557.41 | -0.0359 |
| 10 | 1 | 9  | 9  | 9  | 1 | 8  | 8  | 22557.41 | -0.0205 |
| 10 | 3 | 8  | 9  | 9  | 3 | 7  | 8  | 22570.28 | 0.0034  |
| 10 | 3 | 8  | 11 | 9  | 3 | 7  | 10 | 22570.28 | -0.0001 |
| 11 | 1 | 11 | 12 | 10 | 1 | 10 | 11 | 22590.55 | -0.0647 |
| 11 | 1 | 11 | 11 | 10 | 1 | 10 | 10 | 22590.55 | -0.0541 |
| 11 | 1 | 11 | 10 | 10 | 1 | 10 | 9  | 22590.55 | -0.052  |
| 10 | 5 | 6  | 10 | 9  | 5 | 5  | 9  | 22600.73 | -0.0635 |
| 10 | 5 | 6  | 11 | 9  | 5 | 5  | 10 | 22600.96 | -0.0645 |
| 10 | 5 | 5  | 10 | 9  | 5 | 4  | 9  | 22604.03 | -0.0605 |
| 10 | 5 | 5  | 11 | 9  | 5 | 4  | 10 | 22604.27 | -0.0611 |
| 11 | 0 | 11 | 12 | 10 | 0 | 10 | 11 | 22638.23 | -0.0539 |
| 11 | 0 | 11 | 11 | 10 | 0 | 10 | 10 | 22638.23 | -0.0472 |
| 11 | 0 | 11 | 10 | 10 | 0 | 10 | 9  | 22638.23 | -0.0411 |
| 10 | 4 | 6  | 11 | 9  | 4 | 5  | 10 | 22731.02 | -0.0539 |
| 10 | 4 | 6  | 9  | 9  | 4 | 5  | 8  | 22731.02 | -0.0613 |
| 10 | 3 | 7  | 11 | 9  | 3 | 6  | 10 | 23214    | -0.0265 |
| 10 | 3 | 7  | 9  | 9  | 3 | 6  | 8  | 23214    | -0.0237 |
| 5  | 3 | 3  | 5  | 4  | 2 | 3  | 5  | 23425.25 | -0.0181 |
| 5  | 3 | 3  | 4  | 4  | 2 | 3  | 3  | 23425.25 | -0.0555 |
| 5  | 3 | 3  | 4  | 4  | 2 | 3  | 3  | 23425.25 | -0.0555 |

|    |   |    |    |    |   |    |    |          |         |
|----|---|----|----|----|---|----|----|----------|---------|
| 5  | 3 | 3  | 6  | 4  | 2 | 3  | 5  | 23425.46 | 0.0409  |
| 5  | 3 | 3  | 4  | 4  | 2 | 3  | 5  | 23425.46 | 0.0091  |
| 5  | 3 | 3  | 6  | 4  | 2 | 3  | 5  | 23425.46 | 0.0409  |
| 5  | 3 | 3  | 5  | 4  | 2 | 3  | 4  | 23425.85 | 0.0044  |
| 5  | 3 | 3  | 5  | 4  | 2 | 3  | 4  | 23425.85 | 0.0044  |
| 10 | 2 | 8  | 11 | 9  | 2 | 7  | 10 | 23591.9  | -0.0648 |
| 10 | 2 | 8  | 10 | 9  | 2 | 7  | 9  | 23591.9  | -0.031  |
| 10 | 2 | 8  | 9  | 9  | 2 | 7  | 8  | 23591.9  | -0.0528 |
| 11 | 2 | 10 | 11 | 10 | 2 | 9  | 10 | 23995.94 | -0.0347 |
| 11 | 2 | 10 | 10 | 10 | 2 | 9  | 9  | 23995.94 | -0.0522 |
| 11 | 2 | 10 | 12 | 10 | 2 | 9  | 11 | 23995.94 | -0.062  |
| 10 | 2 | 9  | 11 | 9  | 1 | 8  | 10 | 24440.57 | 0.0041  |
| 10 | 2 | 9  | 9  | 9  | 1 | 8  | 8  | 24440.57 | 0.0293  |
| 11 | 1 | 10 | 12 | 10 | 1 | 9  | 11 | 24532.22 | -0.0254 |
| 11 | 1 | 10 | 11 | 10 | 1 | 9  | 10 | 24532.22 | -0.0265 |
| 11 | 1 | 10 | 10 | 10 | 1 | 9  | 9  | 24532.22 | -0.0122 |
| 12 | 1 | 12 | 12 | 11 | 1 | 11 | 11 | 24579.76 | -0.0317 |
| 12 | 1 | 12 | 13 | 11 | 1 | 11 | 12 | 24579.76 | -0.0401 |
| 12 | 1 | 12 | 11 | 11 | 1 | 11 | 10 | 24579.76 | -0.0297 |
| 12 | 0 | 12 | 13 | 11 | 0 | 11 | 12 | 24609.04 | -0.0403 |
| 12 | 0 | 12 | 12 | 11 | 0 | 11 | 11 | 24609.04 | -0.034  |
| 12 | 0 | 12 | 11 | 11 | 0 | 11 | 10 | 24609.04 | -0.0297 |
| 11 | 3 | 9  | 10 | 10 | 3 | 8  | 9  | 24792.48 | -0.0363 |
| 11 | 3 | 9  | 11 | 10 | 3 | 8  | 10 | 24792.48 | 0.0221  |

|    |   |   |    |    |   |   |    |          |         |
|----|---|---|----|----|---|---|----|----------|---------|
| 11 | 3 | 9 | 12 | 10 | 3 | 8 | 11 | 24792.48 | -0.0412 |
| 11 | 6 | 6 | 11 | 10 | 6 | 5 | 10 | 24834.38 | -0.0288 |
| 11 | 6 | 6 | 10 | 10 | 6 | 5 | 9  | 24834.62 | -0.0597 |
| 11 | 6 | 5 | 11 | 10 | 6 | 4 | 10 | 24834.62 | -0.0439 |
| 11 | 6 | 6 | 12 | 10 | 6 | 5 | 11 | 24834.62 | -0.0371 |
| 11 | 6 | 5 | 12 | 10 | 6 | 4 | 11 | 24834.86 | -0.0644 |
| 11 | 5 | 7 | 11 | 10 | 5 | 6 | 10 | 24893.47 | -0.0502 |
| 11 | 5 | 7 | 10 | 10 | 5 | 6 | 9  | 24893.63 | -0.0788 |
| 11 | 5 | 7 | 12 | 10 | 5 | 6 | 11 | 24893.63 | -0.0672 |
| 11 | 5 | 6 | 12 | 10 | 5 | 5 | 11 | 24901.78 | -0.0604 |
| 11 | 5 | 6 | 10 | 10 | 5 | 5 | 9  | 24901.78 | -0.0721 |
| 11 | 4 | 8 | 12 | 10 | 4 | 7 | 11 | 24955.6  | -0.0156 |
| 11 | 4 | 8 | 10 | 10 | 4 | 7 | 9  | 24955.6  | -0.0181 |
| 6  | 2 | 4 | 7  | 5  | 0 | 5 | 6  | 24967.36 | 0.0372  |
| 6  | 2 | 4 | 6  | 5  | 0 | 5 | 5  | 24967.64 | 0.0074  |
| 11 | 4 | 7 | 10 | 10 | 4 | 6 | 9  | 25092.81 | -0.0319 |
| 11 | 4 | 7 | 12 | 10 | 4 | 6 | 11 | 25092.81 | -0.029  |
| 11 | 3 | 8 | 12 | 10 | 3 | 7 | 11 | 25711.27 | -0.0065 |
| 11 | 3 | 8 | 10 | 10 | 3 | 7 | 9  | 25711.27 | -0.0021 |
| 11 | 2 | 9 | 12 | 10 | 2 | 8 | 11 | 25882.02 | -0.0527 |
| 11 | 2 | 9 | 11 | 10 | 2 | 8 | 10 | 25882.02 | -0.0317 |
| 11 | 2 | 9 | 10 | 10 | 2 | 8 | 9  | 25882.02 | -0.0418 |

---

## S3.2 Linelist for CHT-1-CN-1 in the vibrational ground state in 75-110 GHz frequency range

Measured frequencies and residuals (in MHz) for the rotational transitions of CHT-1-CN-1 in 75-110 GHz using SPFIT/SPCAT suite of programs from Pickett..

| $J$ | $K_a$ | $K_c$ | $J'$ | $K'_a$ | $K'_c$ | Observed Freq. (MHz) | Residuals (MHz) |
|-----|-------|-------|------|--------|--------|----------------------|-----------------|
| 33  | 12    | 21    | 32   | 12     | 20     | 74997.5472           | -0.0739         |
| 33  | 12    | 22    | 32   | 12     | 21     | 74997.5472           | 0.0391          |
| 35  | 4     | 32    | 34   | 4      | 31     | 75093.8874           | -0.0268         |
| 35  | 3     | 32    | 34   | 3      | 31     | 75096.9191           | -0.0208         |
| 33  | 5     | 28    | 32   | 5      | 27     | 75129.5587           | 0.0235          |
| 33  | 11    | 23    | 32   | 11     | 22     | 75183.3175           | 0.0007          |
| 33  | 11    | 22    | 32   | 11     | 21     | 75185.0656           | -0.0536         |
| 36  | 2     | 34    | 35   | 2      | 33     | 75407.8977           | -0.0473         |
| 36  | 3     | 34    | 35   | 3      | 33     | 75407.8977           | 0.0333          |
| 33  | 10    | 24    | 32   | 10     | 23     | 75433.0484           | 0.0125          |
| 33  | 10    | 23    | 32   | 10     | 22     | 75455.2403           | -0.0134         |
| 33  | 7     | 27    | 32   | 7      | 26     | 75562.5755           | -0.0273         |
| 32  | 6     | 26    | 31   | 6      | 25     | 75615.1514           | -0.0276         |
| 33  | 9     | 25    | 32   | 9      | 24     | 75737.1682           | -0.0422         |
| 37  | 1     | 36    | 36   | 1      | 35     | 75745.5403           | -0.0417         |
| 37  | 2     | 36    | 36   | 2      | 35     | 75745.5403           | -0.0405         |
| 32  | 7     | 25    | 31   | 7      | 24     | 75807.6801           | -0.0317         |

|    |    |    |    |    |    |            |         |
|----|----|----|----|----|----|------------|---------|
| 33 | 8  | 26 | 32 | 8  | 25 | 75920.5881 | -0.0168 |
| 33 | 9  | 24 | 32 | 9  | 23 | 75936.84   | -0.0362 |
| 38 | 1  | 38 | 37 | 1  | 37 | 76092.8422 | -0.0336 |
| 38 | 1  | 38 | 37 | 1  | 37 | 76092.8422 | -0.0336 |
| 38 | 0  | 38 | 37 | 0  | 37 | 76092.8422 | -0.0336 |
| 34 | 6  | 29 | 33 | 6  | 28 | 76462.0929 | 0.0302  |
| 34 | 28 | 6  | 33 | 28 | 5  | 76504.1865 | 0.0763  |
| 34 | 28 | 7  | 33 | 28 | 6  | 76504.1865 | 0.0763  |
| 34 | 26 | 8  | 33 | 26 | 7  | 76534.2013 | 0.0187  |
| 34 | 26 | 9  | 33 | 26 | 8  | 76534.2013 | 0.0187  |
| 34 | 25 | 10 | 33 | 25 | 9  | 76551.8069 | 0.0095  |
| 34 | 25 | 9  | 33 | 25 | 8  | 76551.8069 | 0.0095  |
| 34 | 24 | 10 | 33 | 24 | 9  | 76571.5361 | 0.0016  |
| 34 | 24 | 11 | 33 | 24 | 10 | 76571.5361 | 0.0016  |
| 34 | 23 | 11 | 33 | 23 | 10 | 76593.8168 | 0.035   |
| 34 | 23 | 12 | 33 | 23 | 11 | 76593.8168 | 0.035   |
| 34 | 22 | 12 | 33 | 22 | 11 | 76619.0531 | 0.0336  |
| 34 | 22 | 13 | 33 | 22 | 12 | 76619.0531 | 0.0336  |
| 34 | 21 | 14 | 33 | 21 | 13 | 76647.8741 | 0.0256  |
| 34 | 21 | 13 | 33 | 21 | 12 | 76647.8741 | 0.0256  |
| 34 | 20 | 14 | 33 | 20 | 13 | 76681.0183 | -0.0104 |
| 34 | 20 | 15 | 33 | 20 | 14 | 76681.0183 | -0.0104 |
| 34 | 19 | 16 | 33 | 19 | 15 | 76719.5508 | 0.0168  |
| 34 | 19 | 15 | 33 | 19 | 14 | 76719.5508 | 0.0168  |



|    |    |    |    |    |    |            |         |
|----|----|----|----|----|----|------------|---------|
| 34 | 18 | 16 | 33 | 18 | 15 | 76764.6556 | 0.0245  |
| 34 | 18 | 17 | 33 | 18 | 16 | 76764.6556 | 0.0245  |
| 35 | 5  | 31 | 34 | 5  | 30 | 76792.619  | 0.0017  |
| 34 | 17 | 18 | 33 | 17 | 17 | 76818.0119 | 0.0171  |
| 34 | 17 | 17 | 33 | 17 | 16 | 76818.0119 | 0.0171  |
| 35 | 4  | 31 | 34 | 4  | 30 | 76834.5362 | 0.021   |
| 34 | 16 | 19 | 33 | 16 | 18 | 76881.8987 | 0.0137  |
| 34 | 16 | 18 | 33 | 16 | 17 | 76881.8987 | 0.0137  |
| 34 | 15 | 20 | 33 | 15 | 19 | 76959.4344 | 0.0105  |
| 34 | 15 | 19 | 33 | 15 | 18 | 76959.4344 | 0.0105  |
| 33 | 8  | 25 | 32 | 8  | 24 | 77037.873  | 0.005   |
| 34 | 14 | 21 | 33 | 14 | 20 | 77055.0533 | -0.0001 |
| 34 | 14 | 20 | 33 | 14 | 19 | 77055.0533 | -0.0007 |
| 36 | 4  | 33 | 35 | 4  | 32 | 77070.8845 | -0.043  |
| 36 | 3  | 33 | 35 | 3  | 32 | 77072.7321 | -0.0303 |
| 34 | 13 | 21 | 33 | 13 | 20 | 77175.3039 | -0.0394 |
| 34 | 13 | 22 | 33 | 13 | 21 | 77175.3039 | -0.0272 |
| 34 | 12 | 23 | 33 | 12 | 22 | 77330.467  | 0.1081  |
| 34 | 12 | 22 | 33 | 12 | 21 | 77330.467  | -0.1178 |
| 37 | 3  | 35 | 36 | 3  | 34 | 77387.3512 | -0.0069 |
| 37 | 2  | 35 | 36 | 2  | 34 | 77387.3512 | -0.0535 |
| 34 | 11 | 24 | 33 | 11 | 23 | 77535.8333 | -0.0075 |
| 34 | 11 | 23 | 33 | 11 | 22 | 77539.1232 | -0.0562 |
| 33 | 6  | 27 | 32 | 6  | 26 | 77643.57   | -0.0595 |

|    |    |    |    |    |    |            |         |
|----|----|----|----|----|----|------------|---------|
| 34 | 10 | 25 | 33 | 10 | 24 | 77809.6082 | -0.0106 |
| 34 | 10 | 24 | 33 | 10 | 23 | 77847.6068 | 0.0261  |
| 39 | 0  | 39 | 38 | 0  | 38 | 78073.3227 | -0.016  |
| 39 | 1  | 39 | 38 | 1  | 38 | 78073.3227 | -0.016  |
| 34 | 8  | 27 | 33 | 8  | 26 | 78238.9525 | 0.004   |
| 33 | 7  | 26 | 32 | 7  | 25 | 78358.5604 | 0.021   |
| 34 | 9  | 25 | 33 | 9  | 24 | 78432.0178 | 0.0072  |
| 35 | 6  | 30 | 34 | 6  | 29 | 78472.4949 | -0.0034 |
| 35 | 28 | 7  | 34 | 28 | 6  | 78764.636  | 0.0167  |
| 35 | 28 | 8  | 34 | 28 | 7  | 78764.636  | 0.0167  |
| 36 | 5  | 32 | 35 | 5  | 31 | 78767.9696 | 0.0576  |
| 36 | 4  | 32 | 35 | 4  | 31 | 78794.7837 | 0.007   |
| 35 | 26 | 9  | 34 | 26 | 8  | 78797.3136 | -0.0092 |
| 35 | 26 | 10 | 34 | 26 | 9  | 78797.3136 | -0.0092 |
| 35 | 25 | 11 | 34 | 25 | 10 | 78816.5586 | 0.0656  |
| 35 | 25 | 10 | 34 | 25 | 9  | 78816.5586 | 0.0656  |
| 35 | 5  | 30 | 34 | 5  | 29 | 78834.2679 | -0.0044 |
| 35 | 24 | 11 | 34 | 24 | 10 | 78838.023  | 0.0403  |
| 35 | 24 | 12 | 34 | 24 | 11 | 78838.023  | 0.0403  |
| 35 | 23 | 12 | 34 | 23 | 11 | 78862.2414 | 0.0251  |
| 35 | 23 | 13 | 34 | 23 | 12 | 78862.2414 | 0.0251  |
| 35 | 22 | 14 | 34 | 22 | 13 | 78889.7679 | 0.0487  |
| 35 | 22 | 13 | 34 | 22 | 12 | 78889.7679 | 0.0487  |
| 35 | 21 | 15 | 34 | 21 | 14 | 78921.1484 | -0.0008 |

|    |    |    |    |    |    |            |         |
|----|----|----|----|----|----|------------|---------|
| 35 | 21 | 14 | 34 | 21 | 13 | 78921.1484 | -0.0008 |
| 35 | 20 | 16 | 34 | 20 | 15 | 78957.3912 | 0.0521  |
| 35 | 20 | 15 | 34 | 20 | 14 | 78957.3912 | 0.0521  |
| 35 | 19 | 17 | 34 | 19 | 16 | 78999.3473 | -0.01   |
| 35 | 19 | 16 | 34 | 19 | 15 | 78999.3473 | -0.01   |
| 35 | 19 | 16 | 34 | 19 | 15 | 78999.3473 | -0.01   |
| 35 | 19 | 17 | 34 | 19 | 16 | 78999.3473 | -0.01   |
| 35 | 17 | 18 | 34 | 17 | 17 | 79106.9041 | 0.0088  |
| 35 | 17 | 19 | 34 | 17 | 18 | 79106.9041 | 0.0088  |
| 35 | 16 | 20 | 34 | 16 | 19 | 79176.7706 | 0.0191  |
| 35 | 16 | 19 | 34 | 16 | 18 | 79176.7706 | 0.0191  |
| 35 | 15 | 21 | 34 | 15 | 20 | 79261.6128 | -0.0064 |
| 35 | 15 | 20 | 34 | 15 | 19 | 79261.6128 | -0.0065 |
| 38 | 2  | 36 | 37 | 2  | 35 | 79366.8665 | -0.0729 |
| 38 | 3  | 36 | 37 | 3  | 35 | 79366.8665 | -0.0461 |
| 35 | 13 | 23 | 34 | 13 | 22 | 79498.5638 | 0.0153  |
| 35 | 13 | 22 | 34 | 13 | 21 | 79498.5638 | -0.0102 |
| 34 | 6  | 28 | 33 | 6  | 27 | 79574.0987 | 0.0014  |
| 35 | 12 | 24 | 34 | 12 | 23 | 79669.4975 | 0.1877  |
| 35 | 12 | 23 | 34 | 12 | 22 | 79669.4975 | -0.2526 |
| 39 | 2  | 38 | 38 | 2  | 37 | 79706.1955 | 0.0008  |
| 39 | 1  | 38 | 38 | 1  | 37 | 79706.1955 | 0.0004  |
| 34 | 8  | 26 | 33 | 8  | 25 | 79729.6777 | -0.0296 |
| 35 | 7  | 29 | 34 | 7  | 28 | 79855.0389 | -0.0012 |

|    |    |    |    |    |    |            |         |
|----|----|----|----|----|----|------------|---------|
| 35 | 11 | 25 | 34 | 11 | 24 | 79895.9552 | -0.0249 |
| 35 | 11 | 24 | 34 | 11 | 23 | 79902.021  | 0.0007  |
| 40 | 1  | 40 | 39 | 1  | 39 | 80053.7802 | 0.0165  |
| 40 | 0  | 40 | 39 | 0  | 39 | 80053.7802 | 0.0165  |
| 35 | 10 | 26 | 34 | 10 | 25 | 80193.6467 | 0.0233  |
| 35 | 10 | 25 | 34 | 10 | 24 | 80256.994  | 0.024   |
| 36 | 6  | 31 | 35 | 6  | 30 | 80469.9513 | -0.0098 |
| 35 | 9  | 27 | 34 | 9  | 26 | 80504.4193 | 0.0076  |
| 35 | 8  | 28 | 34 | 8  | 27 | 80531.8728 | -0.012  |
| 36 | 5  | 31 | 35 | 5  | 30 | 80721.8634 | 0.0225  |
| 37 | 5  | 33 | 36 | 5  | 32 | 80742.3305 | 0.0152  |
| 37 | 4  | 33 | 36 | 4  | 32 | 80759.4062 | 0.0304  |
| 34 | 7  | 27 | 33 | 7  | 26 | 80815.4213 | 0.025   |
| 35 | 9  | 26 | 34 | 9  | 25 | 80971.504  | -0.0227 |
| 38 | 4  | 35 | 37 | 4  | 34 | 81025.6327 | 0.0372  |
| 38 | 3  | 35 | 37 | 3  | 34 | 81026.2938 | 0.0352  |
| 36 | 27 | 9  | 35 | 27 | 8  | 81042.9024 | 0.045   |
| 36 | 27 | 10 | 35 | 27 | 9  | 81042.9024 | 0.045   |
| 36 | 26 | 10 | 35 | 26 | 9  | 81061.5633 | 0.0407  |
| 36 | 26 | 11 | 35 | 26 | 10 | 81061.5633 | 0.0407  |
| 36 | 24 | 13 | 35 | 24 | 12 | 81105.7089 | 0.0229  |
| 36 | 24 | 12 | 35 | 24 | 11 | 81105.7089 | 0.0229  |
| 36 | 23 | 13 | 35 | 23 | 12 | 81132.0136 | -0.0107 |
| 36 | 23 | 14 | 35 | 23 | 13 | 81132.0136 | -0.0107 |

|    |    |    |    |    |    |            |         |
|----|----|----|----|----|----|------------|---------|
| 36 | 22 | 15 | 35 | 22 | 14 | 81161.9777 | 0.0492  |
| 36 | 22 | 14 | 35 | 22 | 13 | 81161.9777 | 0.0492  |
| 36 | 21 | 15 | 35 | 21 | 14 | 81196.1066 | -0.0108 |
| 36 | 21 | 16 | 35 | 21 | 15 | 81196.1066 | -0.0108 |
| 36 | 20 | 16 | 35 | 20 | 15 | 81235.4789 | -0.0225 |
| 36 | 20 | 17 | 35 | 20 | 16 | 81235.4789 | -0.0225 |
| 36 | 19 | 18 | 35 | 19 | 17 | 81281.2406 | -0.01   |
| 36 | 19 | 17 | 35 | 19 | 16 | 81281.2406 | -0.01   |
| 36 | 18 | 19 | 35 | 18 | 18 | 81334.9059 | 0.0157  |
| 36 | 18 | 18 | 35 | 18 | 17 | 81334.9059 | 0.0157  |
| 39 | 3  | 37 | 38 | 3  | 36 | 81346.5405 | 0.0239  |
| 39 | 2  | 37 | 38 | 2  | 36 | 81346.5405 | 0.0086  |
| 36 | 17 | 19 | 35 | 17 | 18 | 81398.4739 | 0.0282  |
| 35 | 6  | 29 | 34 | 6  | 28 | 81429.0318 | 0.0451  |
| 36 | 16 | 21 | 35 | 16 | 20 | 81474.6537 | -0.0097 |
| 36 | 16 | 20 | 35 | 16 | 19 | 81474.6537 | -0.0097 |
| 36 | 15 | 22 | 35 | 15 | 21 | 81567.3737 | 0.0091  |
| 36 | 15 | 21 | 35 | 15 | 20 | 81567.3737 | 0.009   |
| 36 | 14 | 23 | 35 | 14 | 22 | 81682.0388 | -0.0015 |
| 36 | 14 | 22 | 35 | 14 | 21 | 81682.0388 | -0.0042 |
| 40 | 1  | 39 | 39 | 1  | 38 | 81686.4725 | 0.0047  |
| 40 | 2  | 39 | 39 | 2  | 38 | 81686.4725 | 0.0049  |
| 36 | 13 | 23 | 35 | 13 | 22 | 81826.938  | -0.0159 |
| 36 | 13 | 24 | 35 | 13 | 23 | 81826.938  | 0.0362  |

|    |    |    |    |    |    |            |         |
|----|----|----|----|----|----|------------|---------|
| 36 | 7  | 30 | 35 | 7  | 29 | 81953.2148 | 0.0026  |
| 41 | 0  | 41 | 40 | 0  | 40 | 82034.1494 | 0.0010  |
| 41 | 1  | 41 | 40 | 1  | 40 | 82034.1494 | 0.0010  |
| 36 | 11 | 26 | 35 | 11 | 25 | 82264.0023 | -0.0034 |
| 36 | 11 | 25 | 35 | 11 | 24 | 82274.6717 | -0.0171 |
| 35 | 8  | 27 | 34 | 8  | 26 | 82436.9039 | -0.0078 |
| 37 | 6  | 32 | 36 | 6  | 31 | 82457.7635 | -0.0121 |
| 36 | 10 | 27 | 35 | 10 | 26 | 82584.069  | -0.0136 |
| 37 | 5  | 32 | 36 | 5  | 31 | 82629.9062 | 0.0016  |
| 36 | 10 | 26 | 35 | 10 | 25 | 82687.3135 | -0.0262 |
| 38 | 5  | 34 | 37 | 5  | 33 | 82716.3755 | 0.0011  |
| 38 | 4  | 34 | 37 | 4  | 33 | 82727.1099 | -0.0054 |
| 36 | 8  | 29 | 35 | 8  | 28 | 82795.2598 | -0.0081 |
| 36 | 9  | 28 | 35 | 9  | 27 | 82879.5191 | 0.038   |
| 39 | 4  | 36 | 38 | 4  | 35 | 83003.1979 | -0.0629 |
| 39 | 3  | 36 | 38 | 3  | 35 | 83003.7281 | 0.0718  |
| 35 | 7  | 28 | 34 | 7  | 27 | 83163.1394 | 0.0028  |
| 36 | 6  | 30 | 35 | 6  | 29 | 83237.8325 | 0.0055  |
| 37 | 31 | 6  | 36 | 31 | 5  | 83243.1961 | 0.0027  |
| 37 | 30 | 7  | 36 | 30 | 6  | 83256.9833 | 0.0889  |
| 37 | 29 | 9  | 36 | 29 | 8  | 83271.9669 | 0.0749  |
| 37 | 28 | 10 | 36 | 28 | 9  | 83288.4717 | 0.0902  |
| 37 | 27 | 11 | 36 | 27 | 10 | 83306.6313 | 0.0358  |
| 37 | 27 | 10 | 36 | 27 | 9  | 83306.6313 | 0.0358  |

|    |    |    |    |    |    |            |         |
|----|----|----|----|----|----|------------|---------|
| 40 | 2  | 38 | 39 | 2  | 37 | 83326.1804 | 0.0123  |
| 37 | 25 | 12 | 36 | 25 | 11 | 83349.3568 | -0.0152 |
| 37 | 25 | 13 | 36 | 25 | 12 | 83349.3568 | -0.0152 |
| 37 | 24 | 14 | 36 | 24 | 13 | 83374.6686 | -0.0134 |
| 37 | 24 | 13 | 36 | 24 | 12 | 83374.6686 | -0.0134 |
| 37 | 23 | 14 | 36 | 23 | 13 | 83403.2649 | 0.0173  |
| 37 | 23 | 15 | 36 | 23 | 14 | 83403.2649 | 0.0173  |
| 37 | 22 | 15 | 36 | 22 | 14 | 83435.7061 | 0.012   |
| 37 | 22 | 16 | 36 | 22 | 15 | 83435.7061 | 0.012   |
| 37 | 21 | 16 | 36 | 21 | 15 | 83472.8063 | 0.0012  |
| 37 | 21 | 17 | 36 | 21 | 16 | 83472.8063 | 0.0012  |
| 37 | 20 | 18 | 36 | 20 | 17 | 83515.584  | 0.0091  |
| 37 | 20 | 17 | 36 | 20 | 16 | 83515.584  | 0.0091  |
| 36 | 9  | 27 | 35 | 9  | 26 | 83562.3856 | -0.0147 |
| 37 | 19 | 19 | 36 | 19 | 18 | 83565.2474 | -0.0344 |
| 37 | 18 | 20 | 36 | 18 | 19 | 83623.6394 | 0.0434  |
| 37 | 18 | 19 | 36 | 18 | 18 | 83623.6394 | 0.0434  |
| 37 | 17 | 21 | 36 | 17 | 20 | 83692.7255 | -0.0141 |
| 37 | 17 | 20 | 36 | 17 | 19 | 83692.7255 | -0.0141 |
| 37 | 16 | 21 | 36 | 16 | 20 | 83775.7391 | 0.0043  |
| 37 | 16 | 22 | 36 | 16 | 21 | 83775.7391 | 0.0043  |
| 37 | 15 | 23 | 36 | 15 | 22 | 83876.8346 | 0.0307  |
| 37 | 15 | 22 | 36 | 15 | 21 | 83876.8346 | 0.0304  |
| 37 | 14 | 23 | 36 | 14 | 22 | 84002.0185 | -0.0351 |

|    |    |    |    |    |    |            |         |
|----|----|----|----|----|----|------------|---------|
| 42 | 0  | 42 | 41 | 0  | 41 | 84014.4803 | -0.0145 |
| 42 | 1  | 42 | 41 | 1  | 41 | 84014.4803 | -0.0145 |
| 37 | 7  | 31 | 36 | 7  | 30 | 84022.8561 | 0.0269  |
| 37 | 13 | 24 | 36 | 13 | 23 | 84160.6883 | -0.0682 |
| 37 | 13 | 25 | 36 | 13 | 24 | 84160.6883 | 0.0358  |
| 37 | 12 | 26 | 36 | 12 | 25 | 84366.8223 | -0.0358 |
| 37 | 12 | 25 | 36 | 12 | 24 | 84368.4273 | 0.0089  |
| 38 | 6  | 33 | 37 | 6  | 32 | 84438.7338 | -0.004  |
| 38 | 5  | 33 | 37 | 5  | 32 | 84554.5347 | 0.0047  |
| 39 | 5  | 35 | 38 | 5  | 34 | 84690.4289 | -0.0054 |
| 39 | 4  | 35 | 38 | 4  | 34 | 84697.1527 | 0.0091  |
| 37 | 10 | 28 | 36 | 10 | 27 | 84979.4289 | 0.0008  |
| 40 | 4  | 37 | 39 | 4  | 36 | 84981.1653 | 0.0346  |
| 37 | 8  | 30 | 36 | 8  | 29 | 85025.9966 | 0.0097  |
| 37 | 6  | 31 | 36 | 6  | 30 | 85030.4512 | -0.0146 |
| 36 | 8  | 28 | 35 | 8  | 27 | 85126.9473 | 0.0025  |
| 37 | 10 | 27 | 36 | 10 | 26 | 85143.8228 | -0.0003 |
| 37 | 9  | 29 | 36 | 9  | 28 | 85242.4513 | -0.0012 |
| 41 | 2  | 39 | 40 | 2  | 38 | 85305.8481 | 0.0117  |
| 41 | 3  | 39 | 40 | 3  | 38 | 85305.8481 | 0.0167  |
| 36 | 7  | 29 | 35 | 7  | 28 | 85392.9532 | -0.0078 |
| 38 | 32 | 7  | 37 | 32 | 6  | 85489.3697 | 0.021   |
| 38 | 31 | 7  | 37 | 31 | 6  | 85502.938  | 0.0346  |
| 38 | 31 | 8  | 37 | 31 | 7  | 85502.938  | 0.0346  |



|    |    |    |    |    |    |            |         |
|----|----|----|----|----|----|------------|---------|
| 38 | 30 | 8  | 37 | 30 | 7  | 85517.708  | 0.0213  |
| 38 | 30 | 9  | 37 | 30 | 8  | 85517.708  | 0.0213  |
| 38 | 29 | 9  | 37 | 29 | 8  | 85533.8514 | -0.0261 |
| 38 | 29 | 10 | 37 | 29 | 9  | 85533.8514 | -0.0261 |
| 38 | 28 | 11 | 37 | 28 | 10 | 85551.6764 | -0.0112 |
| 38 | 28 | 10 | 37 | 28 | 9  | 85551.6764 | -0.0112 |
| 38 | 27 | 12 | 37 | 27 | 11 | 85571.3908 | 0.0212  |
| 38 | 27 | 11 | 37 | 27 | 10 | 85571.3908 | 0.0212  |
| 38 | 26 | 12 | 37 | 26 | 11 | 85593.2307 | 0.0043  |
| 38 | 26 | 13 | 37 | 26 | 12 | 85593.2307 | 0.0043  |
| 38 | 25 | 14 | 37 | 25 | 13 | 85617.6166 | -0.0076 |
| 38 | 25 | 13 | 37 | 25 | 12 | 85617.6166 | -0.0076 |
| 38 | 24 | 14 | 37 | 24 | 13 | 85645.0304 | 0.0217  |
| 38 | 24 | 15 | 37 | 24 | 14 | 85645.0304 | 0.0217  |
| 42 | 1  | 41 | 41 | 1  | 40 | 85646.9442 | 0.0121  |
| 42 | 2  | 41 | 41 | 2  | 40 | 85646.9442 | 0.0122  |
| 38 | 23 | 16 | 37 | 23 | 15 | 85676.0253 | 0.0971  |
| 38 | 22 | 17 | 37 | 22 | 16 | 85711.1664 | 0.1037  |
| 38 | 22 | 16 | 37 | 22 | 15 | 85711.1664 | 0.1037  |
| 38 | 21 | 18 | 37 | 21 | 17 | 85751.2608 | -0.0044 |
| 38 | 21 | 17 | 37 | 21 | 16 | 85751.2608 | -0.0044 |
| 38 | 20 | 19 | 37 | 20 | 18 | 85797.6366 | 0.0173  |
| 38 | 20 | 18 | 37 | 20 | 17 | 85797.6366 | 0.0173  |
| 38 | 19 | 20 | 37 | 19 | 19 | 85851.5029 | -0.0172 |

|    |    |    |    |    |    |            |         |
|----|----|----|----|----|----|------------|---------|
| 38 | 19 | 19 | 37 | 19 | 18 | 85851.5029 | -0.0172 |
| 38 | 18 | 20 | 37 | 18 | 19 | 85914.775  | -0.0183 |
| 38 | 18 | 21 | 37 | 18 | 20 | 85914.775  | -0.0183 |
| 38 | 17 | 21 | 37 | 17 | 20 | 85989.8465 | -0.0275 |
| 38 | 17 | 22 | 37 | 17 | 21 | 85989.8465 | -0.0275 |
| 43 | 0  | 43 | 42 | 0  | 42 | 85994.8076 | 0.0089  |
| 43 | 1  | 43 | 42 | 1  | 42 | 85994.8076 | 0.0089  |
| 38 | 7  | 32 | 37 | 7  | 31 | 86067.4717 | -0.0079 |
| 38 | 16 | 22 | 37 | 16 | 21 | 86080.0415 | -0.0433 |
| 38 | 16 | 23 | 37 | 16 | 22 | 86080.0415 | -0.0433 |
| 37 | 9  | 28 | 36 | 9  | 27 | 86207.8564 | -0.0668 |
| 38 | 14 | 24 | 37 | 14 | 23 | 86326.6635 | -0.0115 |
| 38 | 14 | 25 | 37 | 14 | 24 | 86326.6635 | 0.0002  |
| 39 | 6  | 34 | 38 | 6  | 33 | 86415.1064 | 0.0231  |
| 39 | 5  | 34 | 38 | 5  | 33 | 86491.919  | -0.013  |
| 38 | 13 | 26 | 37 | 13 | 25 | 86500.1684 | 0.0876  |
| 38 | 13 | 25 | 37 | 13 | 24 | 86500.1684 | -0.1152 |
| 40 | 5  | 36 | 39 | 5  | 35 | 86664.7027 | 0.0035  |
| 40 | 4  | 36 | 39 | 4  | 35 | 86668.8711 | 0.0109  |
| 38 | 12 | 27 | 37 | 12 | 26 | 86726.1562 | 0.0039  |
| 38 | 12 | 26 | 37 | 12 | 25 | 86728.9661 | -0.0282 |
| 38 | 6  | 32 | 37 | 6  | 31 | 86830.3486 | -0.0163 |
| 41 | 3  | 38 | 40 | 3  | 37 | 86959.2526 | -0.0716 |
| 41 | 4  | 38 | 40 | 4  | 37 | 86959.2526 | 0.067   |

|    |    |    |    |    |    |            |         |
|----|----|----|----|----|----|------------|---------|
| 38 | 11 | 28 | 37 | 11 | 27 | 87024.187  | 0.0078  |
| 38 | 11 | 27 | 37 | 11 | 26 | 87055.4845 | 0.0029  |
| 38 | 8  | 31 | 37 | 8  | 30 | 87222.1981 | 0.0139  |
| 42 | 2  | 40 | 41 | 2  | 39 | 87285.5269 | 0       |
| 42 | 3  | 40 | 41 | 3  | 39 | 87285.5269 | 0.0029  |
| 38 | 10 | 29 | 37 | 10 | 28 | 87377.3803 | 0.0059  |
| 37 | 7  | 30 | 36 | 7  | 29 | 87502.2782 | -0.0044 |
| 38 | 9  | 30 | 37 | 9  | 29 | 87588.0706 | -0.0026 |
| 43 | 1  | 42 | 42 | 1  | 41 | 87627.1277 | 0.0091  |
| 43 | 2  | 42 | 42 | 2  | 41 | 87627.1277 | 0.0091  |
| 38 | 10 | 28 | 37 | 10 | 27 | 87632.883  | 0.0048  |
| 39 | 32 | 7  | 38 | 32 | 6  | 87748.814  | -0.0006 |
| 39 | 32 | 8  | 38 | 32 | 7  | 87748.814  | -0.0006 |
| 39 | 31 | 8  | 38 | 31 | 7  | 87763.4137 | 0.007   |
| 39 | 31 | 9  | 38 | 31 | 8  | 87763.4137 | 0.007   |
| 37 | 8  | 29 | 36 | 8  | 28 | 87765.0529 | -0.0075 |
| 39 | 30 | 10 | 38 | 30 | 9  | 87779.3398 | 0.0099  |
| 39 | 30 | 9  | 38 | 30 | 8  | 87779.3398 | 0.0099  |
| 39 | 29 | 10 | 38 | 29 | 9  | 87796.8347 | 0.0571  |
| 39 | 29 | 11 | 38 | 29 | 10 | 87796.8347 | 0.0571  |
| 39 | 28 | 11 | 38 | 28 | 10 | 87816.0401 | 0.0607  |
| 39 | 28 | 12 | 38 | 28 | 11 | 87816.0401 | 0.0607  |
| 39 | 27 | 13 | 38 | 27 | 12 | 87837.2357 | 0.0271  |
| 39 | 27 | 12 | 38 | 27 | 11 | 87837.2357 | 0.0271  |

|    |    |    |    |    |    |            |         |
|----|----|----|----|----|----|------------|---------|
| 39 | 26 | 13 | 38 | 26 | 12 | 87860.8263 | 0.0328  |
| 39 | 26 | 14 | 38 | 26 | 13 | 87860.8263 | 0.0328  |
| 39 | 25 | 14 | 38 | 25 | 13 | 87887.1185 | -0.0125 |
| 39 | 25 | 15 | 38 | 25 | 14 | 87887.1185 | -0.0125 |
| 39 | 24 | 16 | 38 | 24 | 15 | 87916.6958 | -0.0087 |
| 39 | 24 | 15 | 38 | 24 | 14 | 87916.6958 | -0.0087 |
| 39 | 23 | 16 | 38 | 23 | 15 | 87950.1131 | 0.0045  |
| 39 | 23 | 17 | 38 | 23 | 16 | 87950.1131 | 0.0045  |
| 44 | 0  | 44 | 43 | 0  | 43 | 87975.0479 | -0.012  |
| 44 | 1  | 44 | 43 | 1  | 43 | 87975.0479 | -0.012  |
| 39 | 22 | 17 | 38 | 22 | 16 | 87988.1006 | 0.0187  |
| 39 | 22 | 18 | 38 | 22 | 17 | 87988.1006 | 0.0187  |
| 39 | 21 | 18 | 38 | 21 | 17 | 88031.5397 | -0.0117 |
| 39 | 21 | 19 | 38 | 21 | 18 | 88031.5397 | -0.0117 |
| 39 | 20 | 19 | 38 | 20 | 18 | 88081.7111 | 0.015   |
| 39 | 20 | 20 | 38 | 20 | 19 | 88081.7111 | 0.015   |
| 39 | 7  | 33 | 38 | 7  | 32 | 88091.1402 | 0.0005  |
| 39 | 18 | 21 | 38 | 18 | 20 | 88208.5798 | 0.0147  |
| 39 | 18 | 22 | 38 | 18 | 21 | 88208.5798 | 0.0147  |
| 39 | 17 | 22 | 38 | 17 | 21 | 88289.8813 | -0.0674 |
| 39 | 17 | 23 | 38 | 17 | 22 | 88289.8813 | -0.0674 |
| 39 | 16 | 23 | 38 | 16 | 22 | 88387.8554 | 0.0183  |
| 39 | 16 | 24 | 38 | 16 | 23 | 88387.8554 | 0.0184  |
| 40 | 6  | 35 | 39 | 6  | 34 | 88388.4763 | -0.0418 |

|    |    |    |    |    |    |            |         |
|----|----|----|----|----|----|------------|---------|
| 40 | 5  | 35 | 39 | 5  | 34 | 88438.9378 | 0.0149  |
| 39 | 15 | 25 | 38 | 15 | 24 | 88507.3686 | -0.0089 |
| 39 | 15 | 24 | 38 | 15 | 23 | 88507.3686 | -0.0101 |
| 41 | 5  | 37 | 40 | 5  | 36 | 88639.2882 | 0.0098  |
| 41 | 4  | 37 | 40 | 4  | 36 | 88641.8352 | -0.0067 |
| 39 | 6  | 33 | 38 | 6  | 32 | 88651.462  | -0.0155 |
| 39 | 14 | 26 | 38 | 14 | 25 | 88656.1169 | 0.0152  |
| 39 | 14 | 25 | 38 | 14 | 24 | 88656.1169 | -0.0087 |
| 39 | 13 | 27 | 38 | 13 | 26 | 88845.6553 | 0.1686  |
| 39 | 13 | 26 | 38 | 13 | 25 | 88845.6553 | -0.2184 |
| 38 | 9  | 29 | 37 | 9  | 28 | 88903.8429 | 0.0029  |
| 42 | 4  | 39 | 41 | 4  | 38 | 88937.4541 | 0.0498  |
| 42 | 3  | 39 | 41 | 3  | 38 | 88937.4541 | -0.0317 |
| 39 | 12 | 28 | 38 | 12 | 27 | 89092.8921 | -0.0216 |
| 39 | 12 | 27 | 38 | 12 | 26 | 89097.9664 | -0.017  |
| 43 | 3  | 41 | 42 | 3  | 40 | 89265.228  | -0.0016 |
| 43 | 2  | 41 | 42 | 2  | 40 | 89265.228  | -0.0032 |
| 39 | 8  | 32 | 38 | 8  | 31 | 89383.3533 | -0.0089 |
| 39 | 11 | 29 | 38 | 11 | 28 | 89416.029  | 0.0128  |
| 39 | 11 | 28 | 38 | 11 | 27 | 89467.9288 | 0.0073  |
| 38 | 7  | 31 | 37 | 7  | 30 | 89496.416  | -0.0263 |
| 44 | 2  | 43 | 43 | 2  | 42 | 89607.2621 | -0.0097 |
| 44 | 1  | 43 | 43 | 1  | 42 | 89607.2621 | -0.0097 |
| 39 | 10 | 30 | 38 | 10 | 29 | 89774.8439 | -0.0009 |

|    |    |    |    |    |    |            |         |
|----|----|----|----|----|----|------------|---------|
| 39 | 9  | 31 | 38 | 9  | 30 | 89911.1854 | 0.0445  |
| 40 | 38 | 2  | 39 | 38 | 1  | 89936.7361 | -0.0678 |
| 40 | 38 | 3  | 39 | 38 | 2  | 89936.7361 | -0.0678 |
| 40 | 34 | 6  | 39 | 34 | 5  | 89981.2833 | -0.0236 |
| 40 | 33 | 7  | 39 | 33 | 6  | 89994.5472 | -0.0722 |
| 40 | 33 | 8  | 39 | 33 | 7  | 89994.5472 | -0.0722 |
| 40 | 32 | 9  | 39 | 32 | 8  | 90009.0693 | 0.0277  |
| 40 | 32 | 8  | 39 | 32 | 7  | 90009.0693 | 0.0277  |
| 40 | 30 | 11 | 39 | 30 | 10 | 90041.8079 | -0.039  |
| 40 | 30 | 10 | 39 | 30 | 9  | 90041.8079 | -0.039  |
| 40 | 28 | 13 | 39 | 28 | 12 | 90081.2759 | -0.0077 |
| 40 | 28 | 12 | 39 | 28 | 11 | 90081.2759 | -0.0077 |
| 40 | 7  | 34 | 39 | 7  | 33 | 90097.8701 | 0.0264  |
| 40 | 27 | 13 | 39 | 27 | 12 | 90104.1233 | -0.0185 |
| 40 | 27 | 14 | 39 | 27 | 13 | 90104.1233 | -0.0185 |
| 40 | 26 | 14 | 39 | 26 | 13 | 90129.5822 | 0.0356  |
| 40 | 26 | 15 | 39 | 26 | 14 | 90129.5822 | 0.0356  |
| 40 | 25 | 16 | 39 | 25 | 15 | 90157.9408 | 0.0132  |
| 40 | 25 | 15 | 39 | 25 | 14 | 90157.9408 | 0.0132  |
| 39 | 10 | 29 | 38 | 10 | 28 | 90162.0821 | -0.0097 |
| 40 | 24 | 17 | 39 | 24 | 16 | 90189.8139 | 0.006   |
| 40 | 24 | 16 | 39 | 24 | 15 | 90189.8139 | 0.006   |
| 40 | 23 | 17 | 39 | 23 | 16 | 90225.839  | 0.0071  |
| 40 | 23 | 18 | 39 | 23 | 17 | 90225.839  | 0.0071  |

|    |    |    |    |    |    |            |         |
|----|----|----|----|----|----|------------|---------|
| 40 | 22 | 19 | 39 | 22 | 18 | 90266.7923 | -0.0075 |
| 40 | 21 | 19 | 39 | 21 | 18 | 90313.7075 | -0.0106 |
| 40 | 21 | 20 | 39 | 21 | 19 | 90313.7075 | -0.0106 |
| 40 | 20 | 20 | 39 | 20 | 19 | 90367.8958 | 0.0283  |
| 40 | 20 | 21 | 39 | 20 | 20 | 90367.8958 | 0.0283  |
| 41 | 5  | 36 | 40 | 5  | 35 | 90392.9457 | -0.059  |
| 40 | 19 | 22 | 39 | 19 | 21 | 90430.886  | -0.0164 |
| 40 | 19 | 21 | 39 | 19 | 20 | 90430.886  | -0.0164 |
| 40 | 6  | 34 | 39 | 6  | 33 | 90499.1095 | 0.0086  |
| 40 | 18 | 23 | 39 | 18 | 22 | 90505.0011 | 0.0039  |
| 40 | 18 | 22 | 39 | 18 | 21 | 90505.0011 | 0.0039  |
| 40 | 17 | 24 | 39 | 17 | 23 | 90593.0545 | -0.0132 |
| 40 | 17 | 23 | 39 | 17 | 22 | 90593.0545 | -0.0132 |
| 42 | 5  | 38 | 41 | 5  | 37 | 90614.2249 | 0.0054  |
| 42 | 4  | 38 | 41 | 4  | 37 | 90615.7832 | -0.0061 |
| 40 | 16 | 25 | 39 | 16 | 24 | 90699.13   | 0.0085  |
| 40 | 16 | 24 | 39 | 16 | 23 | 90699.13   | 0.0084  |
| 40 | 15 | 25 | 39 | 15 | 24 | 90828.8645 | 0.0218  |
| 40 | 15 | 26 | 39 | 15 | 25 | 90828.8645 | 0.0244  |
| 43 | 3  | 40 | 42 | 3  | 39 | 90915.7779 | -0.0356 |
| 43 | 4  | 40 | 42 | 4  | 39 | 90915.7779 | 0.0123  |
| 40 | 14 | 26 | 39 | 14 | 25 | 90990.6184 | -0.0232 |
| 40 | 14 | 27 | 39 | 14 | 26 | 90990.6184 | 0.0244  |
| 40 | 13 | 28 | 39 | 13 | 27 | 91197.1641 | -0.0242 |

|    |    |    |    |    |    |            |         |
|----|----|----|----|----|----|------------|---------|
| 40 | 13 | 27 | 39 | 13 | 26 | 91197.9447 | 0.0332  |
| 44 | 2  | 42 | 43 | 2  | 41 | 91244.9542 | 0.0119  |
| 44 | 3  | 42 | 43 | 3  | 41 | 91244.9542 | 0.0128  |
| 39 | 7  | 32 | 38 | 7  | 31 | 91390.9488 | 0.0063  |
| 40 | 12 | 29 | 39 | 12 | 28 | 91467.4444 | 0.0034  |
| 40 | 12 | 28 | 39 | 12 | 27 | 91476.2987 | -0.0049 |
| 40 | 8  | 33 | 39 | 8  | 32 | 91510.3759 | 0.0046  |
| 45 | 2  | 44 | 44 | 2  | 43 | 91587.389  | -0.0008 |
| 45 | 1  | 44 | 44 | 1  | 43 | 91587.389  | -0.0008 |
| 40 | 11 | 30 | 39 | 11 | 29 | 91814.9242 | 0.0086  |
| 40 | 11 | 29 | 39 | 11 | 28 | 91899.1971 | -0.0047 |
| 46 | 0  | 46 | 45 | 0  | 45 | 91935.4499 | -0.0004 |
| 46 | 1  | 46 | 45 | 1  | 45 | 91935.4499 | -0.0004 |
| 41 | 7  | 35 | 40 | 7  | 34 | 92091.4191 | 0.0153  |
| 40 | 10 | 31 | 39 | 10 | 30 | 92167.9798 | 0.0133  |
| 40 | 9  | 32 | 39 | 9  | 31 | 92206.8947 | 0.0117  |
| 41 | 36 | 6  | 40 | 36 | 5  | 92214.7681 | -0.0517 |
| 41 | 36 | 5  | 40 | 36 | 4  | 92214.7681 | -0.0517 |
| 41 | 35 | 6  | 40 | 35 | 5  | 92227.0811 | -0.0157 |
| 41 | 35 | 7  | 40 | 35 | 6  | 92227.0811 | -0.0157 |
| 41 | 34 | 8  | 40 | 34 | 7  | 92240.2938 | -0.0166 |
| 41 | 34 | 7  | 40 | 34 | 6  | 92240.2938 | -0.0166 |
| 41 | 33 | 8  | 40 | 33 | 7  | 92254.574  | -0.0073 |
| 41 | 33 | 9  | 40 | 33 | 8  | 92254.574  | -0.0073 |



|    |    |    |    |    |    |            |         |
|----|----|----|----|----|----|------------|---------|
| 41 | 32 | 9  | 40 | 32 | 8  | 92270.0733 | 0.0237  |
| 41 | 32 | 10 | 40 | 32 | 9  | 92270.0733 | 0.0237  |
| 41 | 31 | 11 | 40 | 31 | 10 | 92286.8604 | -0.0186 |
| 41 | 31 | 10 | 40 | 31 | 9  | 92286.8604 | -0.0186 |
| 41 | 30 | 12 | 40 | 30 | 11 | 92305.23   | -0.031  |
| 41 | 30 | 11 | 40 | 30 | 10 | 92305.23   | -0.031  |
| 41 | 29 | 12 | 40 | 29 | 11 | 92325.4167 | -0.0046 |
| 41 | 29 | 13 | 40 | 29 | 12 | 92325.4167 | -0.0046 |
| 42 | 6  | 37 | 41 | 6  | 36 | 92331.2509 | -0.0115 |
| 41 | 28 | 14 | 40 | 28 | 13 | 92347.6278 | 0.0004  |
| 41 | 28 | 13 | 40 | 28 | 12 | 92347.6278 | 0.0004  |
| 41 | 24 | 17 | 40 | 24 | 16 | 92464.3524 | -0.0057 |
| 41 | 24 | 18 | 40 | 24 | 17 | 92464.3524 | -0.0057 |
| 41 | 23 | 18 | 40 | 23 | 17 | 92503.083  | -0.0583 |
| 41 | 23 | 19 | 40 | 23 | 18 | 92503.083  | -0.0583 |
| 41 | 22 | 20 | 40 | 22 | 19 | 92547.2653 | -0.0001 |
| 41 | 22 | 19 | 40 | 22 | 18 | 92547.2653 | -0.0001 |
| 43 | 5  | 39 | 42 | 5  | 38 | 92589.5412 | 0.0088  |
| 43 | 4  | 39 | 42 | 4  | 38 | 92590.4406 | -0.0475 |
| 41 | 21 | 21 | 40 | 21 | 20 | 92597.8296 | 0.0089  |
| 41 | 21 | 20 | 40 | 21 | 19 | 92597.8296 | 0.0089  |
| 41 | 20 | 21 | 40 | 20 | 20 | 92656.1926 | -0.0044 |
| 41 | 20 | 22 | 40 | 20 | 21 | 92656.1926 | -0.0044 |
| 41 | 19 | 22 | 40 | 19 | 21 | 92724.1756 | -0.0175 |

|    |    |    |    |    |    |            |         |
|----|----|----|----|----|----|------------|---------|
| 41 | 19 | 23 | 40 | 19 | 22 | 92724.1756 | -0.0175 |
| 40 | 10 | 30 | 39 | 10 | 29 | 92739.3349 | -0.0183 |
| 39 | 8  | 31 | 38 | 8  | 30 | 92772.3148 | 0.0021  |
| 41 | 18 | 23 | 40 | 18 | 22 | 92804.1562 | -0.0218 |
| 41 | 18 | 24 | 40 | 18 | 23 | 92804.1562 | -0.0218 |
| 44 | 4  | 41 | 43 | 4  | 40 | 92894.28   | 0.0301  |
| 44 | 3  | 41 | 43 | 3  | 40 | 92894.28   | 0.0022  |
| 41 | 17 | 25 | 40 | 17 | 24 | 92899.3569 | 0.0182  |
| 41 | 17 | 24 | 40 | 17 | 23 | 92899.3569 | 0.0181  |
| 41 | 16 | 25 | 40 | 16 | 24 | 93014.0796 | 0.0053  |
| 41 | 16 | 26 | 40 | 16 | 25 | 93014.0796 | 0.0056  |
| 41 | 15 | 27 | 40 | 15 | 26 | 93154.6482 | -0.0075 |
| 41 | 15 | 26 | 40 | 15 | 25 | 93154.6482 | -0.0129 |
| 40 | 7  | 33 | 39 | 7  | 32 | 93211.4605 | -0.0048 |
| 45 | 3  | 43 | 44 | 3  | 42 | 93224.6566 | 0.0037  |
| 45 | 2  | 43 | 44 | 2  | 42 | 93224.6566 | 0.0032  |
| 41 | 14 | 28 | 40 | 14 | 27 | 93330.4271 | 0.039   |
| 41 | 14 | 27 | 40 | 14 | 26 | 93330.4271 | -0.0539 |
| 41 | 13 | 29 | 40 | 13 | 28 | 93555.6141 | 0.0947  |
| 46 | 1  | 45 | 45 | 1  | 44 | 93567.4679 | -0.0026 |
| 46 | 2  | 45 | 45 | 2  | 44 | 93567.4679 | -0.0026 |
| 41 | 8  | 34 | 40 | 8  | 33 | 93605.2953 | 0.0143  |
| 41 | 12 | 30 | 40 | 12 | 29 | 93849.9408 | -0.0129 |
| 41 | 12 | 29 | 40 | 12 | 28 | 93865.034  | -0.1113 |

|    |    |    |    |    |    |            |         |
|----|----|----|----|----|----|------------|---------|
| 47 | 0  | 47 | 46 | 0  | 46 | 93915.5728 | -0.0045 |
| 47 | 1  | 47 | 46 | 1  | 46 | 93915.5728 | -0.0045 |
| 42 | 7  | 36 | 41 | 7  | 35 | 94075.208  | -0.0007 |
| 41 | 11 | 31 | 40 | 11 | 30 | 94219.7118 | 0.0159  |
| 42 | 6  | 36 | 41 | 6  | 35 | 94269.0021 | -0.0102 |
| 43 | 6  | 38 | 42 | 6  | 37 | 94302.0136 | -0.01   |
| 43 | 5  | 38 | 42 | 5  | 37 | 94315.4304 | -0.0079 |
| 41 | 11 | 30 | 40 | 11 | 29 | 94353.7059 | -0.0091 |
| 40 | 9  | 31 | 39 | 9  | 30 | 94373.9539 | 0.0056  |
| 41 | 9  | 33 | 40 | 9  | 32 | 94471.3167 | 0.0005  |
| 42 | 35 | 8  | 41 | 35 | 7  | 94485.861  | -0.019  |
| 42 | 33 | 9  | 41 | 33 | 8  | 94515.3003 | 0.0076  |
| 42 | 32 | 11 | 41 | 32 | 10 | 94531.812  | -0.0468 |
| 42 | 32 | 10 | 41 | 32 | 9  | 94531.812  | -0.0468 |
| 42 | 31 | 11 | 41 | 31 | 10 | 94549.9343 | 0.0435  |
| 42 | 31 | 12 | 41 | 31 | 11 | 94549.9343 | 0.0435  |
| 41 | 10 | 32 | 40 | 10 | 31 | 94552.1339 | -0.0286 |
| 44 | 5  | 40 | 43 | 5  | 39 | 94565.3532 | 0.1486  |
| 44 | 4  | 40 | 43 | 4  | 39 | 94565.6875 | -0.096  |
| 42 | 30 | 13 | 41 | 30 | 12 | 94569.5613 | -0.0338 |
| 42 | 29 | 14 | 41 | 29 | 13 | 94591.2043 | -0.0105 |
| 42 | 29 | 13 | 41 | 29 | 12 | 94591.2043 | -0.0105 |
| 42 | 28 | 15 | 41 | 28 | 14 | 94615.0482 | 0.0103  |
| 42 | 28 | 14 | 41 | 28 | 13 | 94615.0482 | 0.0103  |

|    |    |    |    |    |    |            |         |
|----|----|----|----|----|----|------------|---------|
| 42 | 27 | 16 | 41 | 27 | 15 | 94641.4258 | 0.0172  |
| 42 | 27 | 15 | 41 | 27 | 14 | 94641.4258 | 0.0172  |
| 42 | 26 | 16 | 41 | 26 | 15 | 94670.7036 | -0.0362 |
| 42 | 26 | 17 | 41 | 26 | 16 | 94670.7036 | -0.0362 |
| 42 | 25 | 18 | 41 | 25 | 17 | 94703.5039 | -0.0277 |
| 42 | 25 | 17 | 41 | 25 | 16 | 94703.5039 | -0.0277 |
| 42 | 24 | 18 | 41 | 24 | 17 | 94740.3722 | -0.0224 |
| 42 | 24 | 19 | 41 | 24 | 18 | 94740.3722 | -0.0224 |
| 42 | 23 | 19 | 41 | 23 | 18 | 94782.1312 | 0.05    |
| 42 | 23 | 20 | 41 | 23 | 19 | 94782.1312 | 0.05    |
| 42 | 22 | 21 | 41 | 22 | 20 | 94829.5417 | 0.0135  |
| 42 | 22 | 20 | 41 | 22 | 19 | 94829.5417 | 0.0135  |
| 45 | 4  | 42 | 44 | 4  | 41 | 94872.8625 | 0.0235  |
| 45 | 3  | 42 | 44 | 3  | 41 | 94872.8625 | 0.0073  |
| 42 | 21 | 22 | 41 | 21 | 21 | 94883.9204 | 0.0048  |
| 42 | 21 | 21 | 41 | 21 | 20 | 94883.9204 | 0.0048  |
| 42 | 20 | 23 | 41 | 20 | 22 | 94946.769  | 0.0191  |
| 42 | 20 | 22 | 41 | 20 | 21 | 94946.769  | 0.0191  |
| 41 | 7  | 34 | 40 | 7  | 33 | 94989.7168 | -0.0049 |
| 42 | 19 | 24 | 41 | 19 | 23 | 95019.9773 | -0.0073 |
| 42 | 19 | 23 | 41 | 19 | 22 | 95019.9773 | -0.0073 |
| 40 | 8  | 32 | 39 | 8  | 31 | 95104.5073 | -0.0038 |
| 42 | 18 | 24 | 41 | 18 | 23 | 95106.2012 | 0.0023  |
| 42 | 18 | 25 | 41 | 18 | 24 | 95106.2012 | 0.0023  |

|    |    |    |    |    |    |            |         |
|----|----|----|----|----|----|------------|---------|
| 46 | 2  | 44 | 45 | 2  | 43 | 95204.3459 | -0.0133 |
| 46 | 3  | 44 | 45 | 3  | 43 | 95204.3459 | -0.013  |
| 42 | 17 | 25 | 41 | 17 | 24 | 95208.821  | -0.0533 |
| 42 | 17 | 26 | 41 | 17 | 25 | 95208.821  | -0.0533 |
| 42 | 16 | 26 | 41 | 16 | 25 | 95332.8263 | -0.0123 |
| 42 | 16 | 27 | 41 | 16 | 26 | 95332.8263 | -0.0117 |
| 41 | 10 | 31 | 40 | 10 | 30 | 95370.9677 | -0.0285 |
| 42 | 15 | 27 | 41 | 15 | 26 | 95485.0002 | -0.026  |
| 42 | 15 | 28 | 41 | 15 | 27 | 95485.0002 | -0.0151 |
| 42 | 8  | 35 | 41 | 8  | 34 | 95671.1373 | -0.0122 |
| 42 | 14 | 28 | 41 | 14 | 27 | 95675.8372 | -0.0903 |
| 42 | 14 | 29 | 41 | 14 | 28 | 95675.8372 | 0.0873  |
| 48 | 1  | 48 | 47 | 1  | 47 | 95895.6536 | -0.0037 |
| 48 | 0  | 48 | 47 | 0  | 47 | 95895.6536 | -0.0037 |
| 42 | 13 | 29 | 41 | 13 | 28 | 95923.2086 | 0.0052  |
| 43 | 7  | 37 | 42 | 7  | 36 | 96052.1042 | -0.0088 |
| 43 | 6  | 37 | 42 | 6  | 36 | 96183.6322 | 0.0028  |
| 42 | 12 | 31 | 41 | 12 | 30 | 96240.5763 | 0.0397  |
| 42 | 12 | 30 | 41 | 12 | 29 | 96266.089  | 0.0092  |
| 44 | 6  | 39 | 43 | 6  | 38 | 96272.9369 | -0.0018 |
| 44 | 5  | 39 | 43 | 5  | 38 | 96281.4118 | -0.0147 |
| 45 | 5  | 41 | 44 | 5  | 40 | 96541.2532 | 0.0415  |
| 45 | 4  | 41 | 44 | 4  | 40 | 96541.2532 | -0.3074 |
| 42 | 11 | 32 | 41 | 11 | 31 | 96628.5557 | 0.011   |

|    |    |    |    |    |    |            |         |
|----|----|----|----|----|----|------------|---------|
| 42 | 9  | 34 | 41 | 9  | 33 | 96701.5395 | -0.0026 |
| 43 | 36 | 7  | 42 | 36 | 6  | 96731.2767 | -0.0447 |
| 43 | 36 | 8  | 42 | 36 | 7  | 96731.2767 | -0.0447 |
| 43 | 35 | 8  | 42 | 35 | 7  | 96745.3443 | 0.0045  |
| 43 | 35 | 9  | 42 | 35 | 8  | 96745.3443 | 0.0045  |
| 42 | 7  | 35 | 41 | 7  | 34 | 96756.3262 | 0.0177  |
| 43 | 34 | 10 | 42 | 34 | 9  | 96760.4249 | -0.0189 |
| 43 | 34 | 9  | 42 | 34 | 8  | 96760.4249 | -0.0189 |
| 43 | 33 | 11 | 42 | 33 | 10 | 96776.7606 | -0.0122 |
| 43 | 33 | 10 | 42 | 33 | 9  | 96776.7606 | -0.0122 |
| 43 | 32 | 12 | 42 | 32 | 11 | 96794.4837 | -0.0054 |
| 43 | 32 | 11 | 42 | 32 | 10 | 96794.4837 | -0.0054 |
| 43 | 30 | 13 | 42 | 30 | 12 | 96834.8786 | 0.0061  |
| 43 | 30 | 14 | 42 | 30 | 13 | 96834.8786 | 0.0061  |
| 42 | 11 | 31 | 41 | 11 | 30 | 96837.0779 | -0.0409 |
| 46 | 4  | 43 | 45 | 4  | 42 | 96851.5277 | 0.0115  |
| 46 | 3  | 43 | 45 | 3  | 42 | 96851.5277 | 0.002   |
| 43 | 29 | 15 | 42 | 29 | 14 | 96858.0198 | -0.0031 |
| 43 | 29 | 14 | 42 | 29 | 13 | 96858.0198 | -0.0031 |
| 43 | 28 | 15 | 42 | 28 | 14 | 96883.5435 | 0.001   |
| 43 | 28 | 16 | 42 | 28 | 15 | 96883.5435 | 0.001   |
| 43 | 27 | 16 | 42 | 27 | 15 | 96911.8308 | 0.0291  |
| 43 | 27 | 17 | 42 | 27 | 16 | 96911.8308 | 0.0291  |
| 42 | 10 | 33 | 41 | 10 | 32 | 96922.3143 | -0.0319 |

|    |    |    |    |    |    |            |         |
|----|----|----|----|----|----|------------|---------|
| 43 | 26 | 17 | 42 | 26 | 16 | 96943.2827 | 0.0379  |
| 43 | 26 | 18 | 42 | 26 | 17 | 96943.2827 | 0.0379  |
| 43 | 25 | 18 | 42 | 25 | 17 | 96978.4085 | -0.0022 |
| 43 | 25 | 19 | 42 | 25 | 18 | 96978.4085 | -0.0022 |
| 43 | 24 | 20 | 42 | 24 | 19 | 97017.9902 | 0.0328  |
| 43 | 24 | 19 | 42 | 24 | 18 | 97017.9902 | 0.0328  |
| 43 | 23 | 20 | 42 | 23 | 19 | 97062.7243 | 0.0281  |
| 43 | 23 | 21 | 42 | 23 | 20 | 97062.7243 | 0.0281  |
| 43 | 22 | 21 | 42 | 22 | 20 | 97113.6349 | -0.0038 |
| 43 | 22 | 22 | 42 | 22 | 21 | 97113.6349 | -0.0038 |
| 43 | 21 | 22 | 42 | 21 | 21 | 97172.0717 | 0.0112  |
| 43 | 21 | 23 | 42 | 21 | 22 | 97172.0717 | 0.0112  |
| 47 | 3  | 45 | 46 | 3  | 44 | 97184.0576 | 0.0032  |
| 47 | 2  | 45 | 46 | 2  | 44 | 97184.0576 | 0.0031  |
| 43 | 20 | 24 | 42 | 20 | 23 | 97239.6024 | 0.0095  |
| 43 | 20 | 23 | 42 | 20 | 22 | 97239.6024 | 0.0095  |
| 41 | 8  | 33 | 40 | 8  | 32 | 97309.9227 | 0.0139  |
| 43 | 19 | 25 | 42 | 19 | 24 | 97318.3754 | 0.0199  |
| 43 | 19 | 24 | 42 | 19 | 23 | 97318.3754 | 0.0199  |
| 43 | 18 | 25 | 42 | 18 | 24 | 97411.1269 | -0.0277 |
| 43 | 17 | 26 | 42 | 17 | 25 | 97521.7866 | -0.0054 |
| 43 | 17 | 27 | 42 | 17 | 26 | 97521.7866 | -0.0053 |
| 48 | 1  | 47 | 47 | 1  | 46 | 97527.5188 | 0.0054  |
| 48 | 2  | 47 | 47 | 2  | 46 | 97527.5188 | 0.0054  |

|    |    |    |    |    |    |            |         |
|----|----|----|----|----|----|------------|---------|
| 43 | 16 | 28 | 42 | 16 | 27 | 97655.5647 | -0.0003 |
| 43 | 16 | 27 | 42 | 16 | 26 | 97655.5647 | -0.0014 |
| 43 | 8  | 36 | 42 | 8  | 35 | 97711.7223 | 0.0014  |
| 43 | 15 | 29 | 42 | 15 | 28 | 97820.1547 | 0.0312  |
| 43 | 15 | 28 | 42 | 15 | 27 | 97820.1547 | 0.0095  |
| 44 | 7  | 38 | 43 | 7  | 37 | 98024.4118 | 0.0056  |
| 43 | 14 | 29 | 42 | 14 | 28 | 98027.3417 | 0.044   |
| 43 | 14 | 30 | 42 | 14 | 29 | 98027.3417 | 0.377   |
| 42 | 10 | 32 | 41 | 10 | 31 | 98058.6587 | -0.0085 |
| 44 | 6  | 38 | 43 | 6  | 37 | 98112.5119 | 0.0055  |
| 45 | 6  | 40 | 44 | 6  | 39 | 98244.2061 | -0.0177 |
| 43 | 13 | 31 | 42 | 13 | 30 | 98293.4308 | -0.0082 |
| 43 | 13 | 30 | 42 | 13 | 29 | 98297.6194 | -0.0172 |
| 46 | 4  | 42 | 45 | 4  | 41 | 98517.6399 | -0.0931 |
| 43 | 7  | 36 | 42 | 7  | 35 | 98534.4276 | 0.0362  |
| 43 | 12 | 31 | 42 | 12 | 30 | 98681.1969 | -0.0072 |
| 43 | 12 | 31 | 42 | 12 | 30 | 98681.1969 | -0.0072 |
| 47 | 3  | 44 | 46 | 3  | 43 | 98830.2581 | -0.0142 |
| 47 | 4  | 44 | 46 | 4  | 43 | 98830.2581 | -0.0088 |
| 47 | 4  | 44 | 46 | 4  | 43 | 98830.2581 | -0.0088 |
| 47 | 3  | 44 | 46 | 3  | 43 | 98830.2581 | -0.0142 |
| 43 | 9  | 35 | 42 | 9  | 34 | 98895.9417 | -0.0056 |
| 44 | 41 | 3  | 43 | 41 | 2  | 98929.2639 | -0.0149 |
| 44 | 39 | 5  | 43 | 39 | 4  | 98951.4404 | -0.0298 |



|    |    |    |    |    |    |            |         |
|----|----|----|----|----|----|------------|---------|
| 44 | 39 | 6  | 43 | 39 | 5  | 98951.4404 | -0.0298 |
| 44 | 38 | 6  | 43 | 38 | 5  | 98963.6    | -0.0365 |
| 44 | 38 | 7  | 43 | 38 | 6  | 98963.6    | -0.0365 |
| 44 | 37 | 8  | 43 | 37 | 7  | 98976.6147 | -0.0131 |
| 44 | 37 | 7  | 43 | 37 | 6  | 98976.6147 | -0.0131 |
| 44 | 36 | 9  | 43 | 36 | 8  | 98990.5732 | 0.0309  |
| 44 | 36 | 8  | 43 | 36 | 7  | 98990.5732 | 0.0309  |
| 44 | 35 | 10 | 43 | 35 | 9  | 99005.4895 | -0.0032 |
| 44 | 35 | 9  | 43 | 35 | 8  | 99005.4895 | -0.0032 |
| 44 | 34 | 10 | 43 | 34 | 9  | 99021.6021 | -0.0066 |
| 44 | 34 | 11 | 43 | 34 | 10 | 99021.6021 | -0.0066 |
| 43 | 11 | 33 | 42 | 11 | 32 | 99038.9952 | 0.0802  |
| 44 | 33 | 12 | 43 | 33 | 11 | 99038.9952 | -0.0449 |
| 44 | 33 | 11 | 43 | 33 | 10 | 99038.9952 | -0.0449 |
| 44 | 32 | 12 | 43 | 32 | 11 | 99057.9569 | -0.0038 |
| 44 | 32 | 13 | 43 | 32 | 12 | 99057.9569 | -0.0038 |
| 44 | 31 | 13 | 43 | 31 | 12 | 99078.5935 | 0.0199  |
| 44 | 31 | 14 | 43 | 31 | 13 | 99078.5935 | 0.0199  |
| 44 | 30 | 15 | 43 | 30 | 14 | 99101.1168 | 0       |
| 44 | 30 | 14 | 43 | 30 | 13 | 99101.1168 | 0       |
| 44 | 29 | 15 | 43 | 29 | 14 | 99125.8902 | 0.0193  |
| 44 | 29 | 16 | 43 | 29 | 15 | 99125.8902 | 0.0193  |
| 44 | 28 | 17 | 43 | 28 | 16 | 99153.1878 | 0.0191  |
| 44 | 28 | 16 | 43 | 28 | 15 | 99153.1878 | 0.0191  |

|    |    |    |    |    |    |            |         |
|----|----|----|----|----|----|------------|---------|
| 48 | 3  | 46 | 47 | 3  | 45 | 99163.7434 | 0.0086  |
| 48 | 2  | 46 | 47 | 2  | 45 | 99163.7434 | 0.0086  |
| 44 | 27 | 18 | 43 | 27 | 17 | 99183.4187 | 0.011   |
| 44 | 27 | 17 | 43 | 27 | 16 | 99183.4187 | 0.011   |
| 44 | 26 | 18 | 43 | 26 | 17 | 99216.9917 | -0.0744 |
| 44 | 26 | 19 | 43 | 26 | 18 | 99216.9917 | -0.0744 |
| 44 | 25 | 19 | 43 | 25 | 18 | 99254.7076 | -0.0155 |
| 44 | 25 | 20 | 43 | 25 | 19 | 99254.7076 | -0.0155 |
| 43 | 10 | 34 | 42 | 10 | 33 | 99273.1995 | -0.0111 |
| 44 | 24 | 20 | 43 | 24 | 19 | 99297.1112 | 0.0244  |
| 44 | 24 | 21 | 43 | 24 | 20 | 99297.1112 | 0.0244  |
| 44 | 23 | 21 | 43 | 23 | 20 | 99345.0869 | 0.0552  |
| 44 | 23 | 22 | 43 | 23 | 21 | 99345.0869 | 0.0552  |
| 43 | 11 | 32 | 42 | 11 | 31 | 99356.4018 | 0.0314  |
| 42 | 8  | 34 | 41 | 8  | 33 | 99387.8758 | 0.0035  |
| 44 | 22 | 23 | 43 | 22 | 22 | 99399.6599 | 0.0117  |
| 44 | 22 | 22 | 43 | 22 | 21 | 99399.6599 | 0.0117  |
| 44 | 21 | 24 | 43 | 21 | 23 | 99462.3039 | -0.0104 |
| 44 | 21 | 23 | 43 | 21 | 22 | 99462.3039 | -0.0104 |
| 49 | 2  | 48 | 48 | 2  | 47 | 99507.5001 | 0.028   |
| 49 | 1  | 48 | 48 | 1  | 47 | 99507.5001 | 0.028   |
| 44 | 20 | 24 | 43 | 20 | 23 | 99534.7873 | -0.0072 |
| 44 | 20 | 25 | 43 | 20 | 24 | 99534.7873 | -0.0072 |
| 44 | 19 | 25 | 43 | 19 | 24 | 99619.3936 | 0.0066  |

|    |    |    |    |    |    |            |         |
|----|----|----|----|----|----|------------|---------|
| 44 | 19 | 26 | 43 | 19 | 25 | 99619.3936 | 0.0066  |
| 44 | 18 | 26 | 43 | 18 | 25 | 99719.1565 | 0.0128  |
| 44 | 18 | 27 | 43 | 18 | 26 | 99719.1565 | 0.0128  |
| 44 | 8  | 37 | 43 | 8  | 36 | 99731.0014 | -0.0874 |
| 42 | 9  | 33 | 41 | 9  | 32 | 99735.8728 | 0.0223  |
| 44 | 17 | 28 | 43 | 17 | 27 | 99838.2399 | 0.0251  |
| 44 | 17 | 27 | 43 | 17 | 26 | 99838.2399 | 0.025   |
| 50 | 1  | 50 | 49 | 1  | 49 | 99855.6735 | 0.0013  |
| 50 | 0  | 50 | 49 | 0  | 49 | 99855.6735 | 0.0013  |
| 44 | 16 | 29 | 43 | 16 | 28 | 99982.4107 | -0.0046 |
| 44 | 16 | 28 | 43 | 16 | 27 | 99982.4107 | -0.007  |
| 45 | 6  | 39 | 44 | 6  | 38 | 100052.174 | -0.0193 |
| 44 | 15 | 29 | 43 | 15 | 28 | 100160.251 | 0.0089  |
| 44 | 15 | 30 | 43 | 15 | 29 | 100160.251 | 0.0512  |
| 46 | 6  | 41 | 45 | 6  | 40 | 100216.009 | 0.0162  |
| 46 | 5  | 41 | 45 | 5  | 40 | 100219.328 | 0.0078  |
| 44 | 7  | 37 | 43 | 7  | 36 | 100337.238 | 0.0189  |
| 47 | 4  | 43 | 46 | 4  | 42 | 100494.164 | -0.0704 |
| 47 | 5  | 43 | 46 | 5  | 42 | 100494.164 | 0.0546  |
| 44 | 13 | 32 | 43 | 13 | 31 | 100673.694 | 0.0099  |
| 44 | 13 | 31 | 43 | 13 | 30 | 100680.969 | 0.0164  |
| 43 | 10 | 33 | 42 | 10 | 32 | 100795.387 | -0.0002 |
| 48 | 4  | 45 | 47 | 4  | 44 | 100809.09  | 0.0119  |
| 48 | 3  | 45 | 47 | 3  | 44 | 100809.09  | 0.0088  |

|    |    |    |    |    |    |            |         |
|----|----|----|----|----|----|------------|---------|
| 44 | 12 | 33 | 43 | 12 | 32 | 101045.114 | 0.0099  |
| 44 | 9  | 36 | 43 | 9  | 35 | 101054.282 | -0.0096 |
| 44 | 12 | 32 | 43 | 12 | 31 | 101113.33  | 0.0075  |
| 49 | 3  | 47 | 48 | 3  | 46 | 101143.397 | 0.0009  |
| 49 | 2  | 47 | 48 | 2  | 46 | 101143.397 | 0.0009  |
| 45 | 35 | 11 | 44 | 35 | 10 | 101266.365 | 0.0099  |
| 45 | 35 | 10 | 44 | 35 | 9  | 101266.365 | 0.0099  |
| 45 | 34 | 12 | 44 | 34 | 11 | 101283.518 | -0.0113 |
| 45 | 34 | 11 | 44 | 34 | 10 | 101283.518 | -0.0113 |
| 45 | 33 | 12 | 44 | 33 | 11 | 101302.073 | -0.0402 |
| 45 | 33 | 13 | 44 | 33 | 12 | 101302.073 | -0.0402 |
| 45 | 32 | 14 | 44 | 32 | 13 | 101322.283 | -0.0104 |
| 45 | 32 | 13 | 44 | 32 | 12 | 101322.283 | -0.0104 |
| 45 | 30 | 16 | 44 | 30 | 15 | 101368.367 | 0.0152  |
| 45 | 30 | 15 | 44 | 30 | 14 | 101368.367 | 0.0152  |
| 45 | 29 | 16 | 44 | 29 | 15 | 101394.735 | -0.0494 |
| 45 | 29 | 17 | 44 | 29 | 16 | 101394.735 | -0.0494 |
| 45 | 28 | 18 | 44 | 28 | 17 | 101423.951 | 0.0068  |
| 45 | 28 | 17 | 44 | 28 | 16 | 101423.951 | 0.0068  |
| 45 | 27 | 19 | 44 | 27 | 18 | 101456.261 | 0.0039  |
| 45 | 27 | 18 | 44 | 27 | 17 | 101456.261 | 0.0039  |
| 45 | 26 | 20 | 44 | 26 | 19 | 101492.243 | 0.0063  |
| 45 | 26 | 19 | 44 | 26 | 18 | 101492.243 | 0.0063  |
| 45 | 25 | 21 | 44 | 25 | 20 | 101532.49  | -0.0155 |

|    |    |    |    |    |    |            |         |
|----|----|----|----|----|----|------------|---------|
| 45 | 25 | 20 | 44 | 25 | 19 | 101532.49  | -0.0155 |
| 45 | 24 | 22 | 44 | 24 | 21 | 101577.835 | 0.0113  |
| 45 | 24 | 21 | 44 | 24 | 20 | 101577.835 | 0.0113  |
| 45 | 23 | 22 | 44 | 23 | 21 | 101629.172 | 0.0383  |
| 45 | 23 | 23 | 44 | 23 | 22 | 101629.172 | 0.0383  |
| 45 | 22 | 24 | 44 | 22 | 23 | 101687.627 | 0.0177  |
| 45 | 22 | 23 | 44 | 22 | 22 | 101687.627 | 0.0177  |
| 45 | 8  | 38 | 44 | 8  | 37 | 101733.414 | 0.0403  |
| 45 | 21 | 24 | 44 | 21 | 23 | 101754.728 | -0.0089 |
| 45 | 21 | 25 | 44 | 21 | 24 | 101754.728 | -0.0089 |
| 45 | 20 | 26 | 44 | 20 | 25 | 101832.434 | 0.0091  |
| 45 | 20 | 25 | 44 | 20 | 24 | 101832.434 | 0.0091  |
| 45 | 19 | 26 | 44 | 19 | 25 | 101923.152 | -0.0109 |
| 45 | 19 | 27 | 44 | 19 | 26 | 101923.152 | -0.0109 |
| 46 | 7  | 40 | 45 | 7  | 39 | 101961.681 | -0.0294 |
| 45 | 17 | 29 | 44 | 17 | 28 | 102158.266 | -0.0066 |
| 45 | 17 | 28 | 44 | 17 | 27 | 102158.266 | -0.0069 |
| 47 | 6  | 42 | 46 | 6  | 41 | 102188.301 | 0.0112  |
| 47 | 5  | 42 | 46 | 5  | 41 | 102190.346 | -0.0085 |
| 43 | 9  | 34 | 42 | 9  | 33 | 102292.525 | -0.0044 |
| 45 | 16 | 29 | 44 | 16 | 28 | 102313.556 | -0.0089 |
| 45 | 16 | 30 | 44 | 16 | 29 | 102313.556 | -0.004  |
| 48 | 4  | 44 | 47 | 4  | 43 | 102470.987 | -0.0242 |
| 48 | 5  | 44 | 47 | 5  | 43 | 102470.987 | 0.0502  |

|    |    |    |    |    |    |            |         |
|----|----|----|----|----|----|------------|---------|
| 45 | 15 | 30 | 44 | 15 | 29 | 102505.507 | -0.0523 |
| 45 | 15 | 31 | 44 | 15 | 30 | 102505.507 | 0.0287  |
| 45 | 14 | 32 | 44 | 14 | 31 | 102748.233 | 0.045   |
| 45 | 14 | 31 | 44 | 14 | 30 | 102749.293 | -0.0031 |
| 49 | 3  | 46 | 48 | 3  | 45 | 102787.943 | 0.004   |
| 49 | 4  | 46 | 48 | 4  | 45 | 102787.943 | 0.0058  |
| 45 | 13 | 33 | 44 | 13 | 32 | 103061.81  | -0.0117 |
| 50 | 3  | 48 | 49 | 3  | 47 | 103123.034 | -0.0006 |
| 50 | 2  | 48 | 49 | 2  | 47 | 103123.034 | -0.0006 |
| 45 | 9  | 37 | 44 | 9  | 36 | 103177.608 | -0.0672 |
| 44 | 8  | 36 | 43 | 8  | 35 | 103205.053 | -0.0235 |
| 46 | 40 | 6  | 45 | 40 | 5  | 103453.888 | -0.0263 |
| 45 | 12 | 34 | 44 | 12 | 33 | 103457.785 | -0.0184 |
| 46 | 37 | 10 | 45 | 37 | 9  | 103495.191 | -0.0582 |
| 46 | 36 | 11 | 45 | 36 | 10 | 103510.943 | -0.0588 |
| 46 | 36 | 10 | 45 | 36 | 9  | 103510.943 | -0.0588 |
| 46 | 35 | 12 | 45 | 35 | 11 | 103527.879 | -0.0645 |
| 46 | 35 | 11 | 45 | 35 | 10 | 103527.879 | -0.0645 |
| 46 | 34 | 13 | 45 | 34 | 12 | 103546.216 | -0.0068 |
| 46 | 34 | 12 | 45 | 34 | 11 | 103546.216 | -0.0068 |
| 44 | 10 | 34 | 43 | 10 | 33 | 103562.456 | -0.0146 |
| 45 | 12 | 33 | 44 | 12 | 32 | 103566     | -0.1636 |
| 46 | 33 | 14 | 45 | 33 | 13 | 103566     | -0.0118 |
| 46 | 32 | 15 | 45 | 32 | 14 | 103587.493 | -0.0161 |

|    |    |    |    |    |    |            |         |
|----|----|----|----|----|----|------------|---------|
| 46 | 32 | 14 | 45 | 32 | 13 | 103587.493 | -0.0161 |
| 46 | 31 | 15 | 45 | 31 | 14 | 103610.953 | 0.0061  |
| 46 | 31 | 16 | 45 | 31 | 15 | 103610.953 | 0.0061  |
| 46 | 30 | 16 | 45 | 30 | 15 | 103636.615 | 0.0156  |
| 46 | 30 | 17 | 45 | 30 | 16 | 103636.615 | 0.0156  |
| 46 | 29 | 17 | 45 | 29 | 16 | 103664.797 | 0.0081  |
| 46 | 29 | 18 | 45 | 29 | 17 | 103664.797 | 0.0081  |
| 46 | 28 | 18 | 45 | 28 | 17 | 103695.892 | -0.0052 |
| 46 | 28 | 19 | 45 | 28 | 18 | 103695.892 | -0.0052 |
| 46 | 27 | 20 | 45 | 27 | 19 | 103730.415 | 0.0339  |
| 46 | 27 | 19 | 45 | 27 | 18 | 103730.415 | 0.0339  |
| 46 | 26 | 21 | 45 | 26 | 20 | 103768.82  | 0.0293  |
| 46 | 26 | 20 | 45 | 26 | 19 | 103768.82  | 0.0293  |
| 46 | 25 | 21 | 45 | 25 | 20 | 103811.777 | -0.0183 |
| 46 | 25 | 22 | 45 | 25 | 21 | 103811.777 | -0.0183 |
| 52 | 0  | 52 | 51 | 0  | 51 | 103815.476 | -0.0112 |
| 52 | 1  | 52 | 51 | 1  | 51 | 103815.476 | -0.0112 |
| 45 | 11 | 35 | 44 | 11 | 34 | 103850.093 | -0.0124 |
| 45 | 10 | 36 | 44 | 10 | 35 | 103896.856 | 0.0624  |
| 46 | 23 | 24 | 45 | 23 | 23 | 103915.046 | -0.0035 |
| 46 | 23 | 23 | 45 | 23 | 22 | 103915.046 | -0.0035 |
| 47 | 7  | 41 | 46 | 7  | 40 | 103928.882 | -0.0288 |
| 47 | 6  | 41 | 46 | 6  | 40 | 103953.745 | -0.0247 |
| 46 | 22 | 25 | 45 | 22 | 24 | 103977.594 | 0.0184  |

|    |    |    |    |    |    |            |         |
|----|----|----|----|----|----|------------|---------|
| 46 | 22 | 24 | 45 | 22 | 23 | 103977.594 | 0.0184  |
| 46 | 7  | 39 | 45 | 7  | 38 | 104029.889 | -0.019  |
| 46 | 21 | 25 | 45 | 21 | 24 | 104049.4   | 0.0087  |
| 46 | 21 | 26 | 45 | 21 | 25 | 104049.4   | 0.0087  |
| 46 | 20 | 27 | 45 | 20 | 26 | 104132.568 | 0.0112  |
| 46 | 20 | 26 | 45 | 20 | 25 | 104132.568 | 0.0112  |
| 48 | 6  | 43 | 47 | 6  | 42 | 104161.135 | 0.0151  |
| 48 | 5  | 43 | 47 | 5  | 42 | 104162.407 | 0.0132  |
| 46 | 19 | 28 | 45 | 19 | 27 | 104229.767 | -0.0028 |
| 46 | 19 | 27 | 45 | 19 | 26 | 104229.767 | -0.0028 |
| 46 | 18 | 28 | 45 | 18 | 27 | 104344.637 | 0.0011  |
| 46 | 18 | 29 | 45 | 18 | 28 | 104344.637 | 0.0011  |
| 49 | 5  | 45 | 48 | 5  | 44 | 104448.003 | 0.0258  |
| 49 | 4  | 45 | 48 | 4  | 44 | 104448.003 | -0.0183 |
| 46 | 17 | 30 | 45 | 17 | 29 | 104482.103 | 0.002   |
| 46 | 17 | 29 | 45 | 17 | 28 | 104482.103 | 0.0015  |
| 45 | 11 | 34 | 44 | 11 | 33 | 104533.947 | 0.0097  |
| 46 | 16 | 31 | 45 | 16 | 30 | 104649.208 | 0.0279  |
| 46 | 16 | 30 | 45 | 16 | 29 | 104649.208 | 0.0181  |
| 44 | 9  | 35 | 43 | 9  | 34 | 104734.277 | -0.0319 |
| 50 | 4  | 47 | 49 | 4  | 46 | 104766.827 | -0.0073 |
| 50 | 3  | 47 | 49 | 3  | 46 | 104766.827 | -0.0083 |
| 46 | 15 | 31 | 45 | 15 | 30 | 104856.304 | -0.0629 |
| 46 | 15 | 32 | 45 | 15 | 31 | 104856.304 | 0.0894  |



|    |    |    |    |    |    |            |         |
|----|----|----|----|----|----|------------|---------|
| 45 | 8  | 37 | 44 | 8  | 36 | 104991.984 | 0.0272  |
| 51 | 3  | 49 | 50 | 3  | 48 | 105102.669 | 0.0221  |
| 51 | 2  | 49 | 50 | 2  | 48 | 105102.669 | 0.0221  |
| 46 | 14 | 33 | 45 | 14 | 32 | 105118.874 | 0.0207  |
| 46 | 9  | 38 | 45 | 9  | 37 | 105268.422 | 0.0261  |
| 52 | 1  | 51 | 51 | 1  | 50 | 105447.104 | 0.0242  |
| 52 | 2  | 51 | 51 | 2  | 50 | 105447.104 | 0.0242  |
| 46 | 13 | 33 | 45 | 13 | 32 | 105478.704 | 0.0216  |
| 47 | 8  | 40 | 46 | 8  | 39 | 105701.763 | 0.0074  |
| 47 | 38 | 10 | 46 | 38 | 9  | 105739.895 | -0.045  |
| 47 | 37 | 10 | 46 | 37 | 9  | 105755.5   | -0.0394 |
| 47 | 37 | 11 | 46 | 37 | 10 | 105755.5   | -0.0394 |
| 47 | 36 | 12 | 46 | 36 | 11 | 105772.255 | -0.0167 |
| 47 | 36 | 11 | 46 | 36 | 10 | 105772.255 | -0.0167 |
| 47 | 35 | 12 | 46 | 35 | 11 | 105790.241 | -0.0342 |
| 47 | 35 | 13 | 46 | 35 | 12 | 105790.241 | -0.0342 |
| 53 | 1  | 53 | 52 | 1  | 52 | 105795.29  | -0.0265 |
| 53 | 0  | 53 | 52 | 0  | 52 | 105795.29  | -0.0265 |
| 47 | 33 | 14 | 46 | 33 | 13 | 105830.792 | 0.0383  |
| 47 | 33 | 15 | 46 | 33 | 14 | 105830.792 | 0.0383  |
| 47 | 32 | 15 | 46 | 32 | 14 | 105853.614 | -0.0122 |
| 47 | 32 | 16 | 46 | 32 | 15 | 105853.614 | -0.0122 |
| 47 | 31 | 17 | 46 | 31 | 16 | 105878.614 | 0.0411  |
| 47 | 31 | 16 | 46 | 31 | 15 | 105878.614 | 0.0411  |

|    |    |    |    |    |    |            |         |
|----|----|----|----|----|----|------------|---------|
| 48 | 7  | 42 | 47 | 7  | 41 | 105896.07  | 0.0187  |
| 47 | 30 | 18 | 46 | 30 | 17 | 105905.872 | -0.0142 |
| 47 | 30 | 17 | 46 | 30 | 16 | 105905.872 | -0.0142 |
| 48 | 6  | 42 | 47 | 6  | 41 | 105912.099 | 0.0281  |
| 47 | 7  | 40 | 46 | 7  | 39 | 105914.933 | -0.0106 |
| 47 | 29 | 19 | 46 | 29 | 18 | 105935.927 | 0.0163  |
| 47 | 29 | 18 | 46 | 29 | 17 | 105935.927 | 0.0163  |
| 47 | 28 | 19 | 46 | 28 | 18 | 105969.079 | 0.0234  |
| 47 | 28 | 20 | 46 | 28 | 19 | 105969.079 | 0.0234  |
| 47 | 27 | 20 | 46 | 27 | 19 | 106005.834 | 0.0247  |
| 47 | 27 | 21 | 46 | 27 | 20 | 106005.834 | 0.0247  |
| 46 | 12 | 34 | 45 | 12 | 33 | 106044.588 | -0.0099 |
| 47 | 26 | 21 | 46 | 26 | 20 | 106046.77  | 0.008   |
| 47 | 26 | 22 | 46 | 26 | 21 | 106046.77  | 0.008   |
| 47 | 25 | 23 | 46 | 25 | 22 | 106092.633 | 0.0027  |
| 47 | 25 | 22 | 46 | 25 | 21 | 106092.633 | 0.0027  |
| 49 | 6  | 44 | 48 | 6  | 43 | 106134.489 | 0.0259  |
| 49 | 5  | 44 | 48 | 5  | 43 | 106135.201 | -0.0435 |
| 47 | 24 | 23 | 46 | 24 | 22 | 106144.313 | 0.024   |
| 47 | 24 | 24 | 46 | 24 | 23 | 106144.313 | 0.024   |
| 46 | 10 | 37 | 45 | 10 | 36 | 106161.069 | 0.0361  |
| 47 | 23 | 24 | 46 | 23 | 23 | 106202.851 | 0.0248  |
| 47 | 23 | 25 | 46 | 23 | 24 | 106202.851 | 0.0248  |
| 47 | 22 | 26 | 46 | 22 | 25 | 106269.631 | 0.0303  |

|    |    |    |    |    |    |            |         |
|----|----|----|----|----|----|------------|---------|
| 47 | 22 | 25 | 46 | 22 | 24 | 106269.631 | 0.0303  |
| 45 | 10 | 35 | 44 | 10 | 34 | 106329.728 | -0.0074 |
| 47 | 21 | 27 | 46 | 21 | 26 | 106346.384 | 0.0451  |
| 47 | 21 | 26 | 46 | 21 | 25 | 106346.384 | 0.0451  |
| 50 | 4  | 46 | 49 | 4  | 45 | 106425.225 | -0.0052 |
| 50 | 5  | 46 | 49 | 5  | 45 | 106425.225 | 0.0208  |
| 47 | 20 | 27 | 46 | 20 | 26 | 106435.277 | 0.0122  |
| 47 | 20 | 28 | 46 | 20 | 27 | 106435.277 | 0.0122  |
| 47 | 19 | 29 | 46 | 19 | 28 | 106539.304 | 0.0055  |
| 47 | 19 | 28 | 46 | 19 | 27 | 106539.304 | 0.0055  |
| 47 | 18 | 29 | 46 | 18 | 28 | 106662.372 | 0.0137  |
| 47 | 18 | 30 | 46 | 18 | 29 | 106662.372 | 0.0138  |
| 46 | 8  | 38 | 45 | 8  | 37 | 106740.83  | -0.0021 |
| 51 | 3  | 48 | 50 | 3  | 47 | 106745.765 | 0.0041  |
| 51 | 4  | 48 | 50 | 4  | 47 | 106745.765 | 0.0047  |
| 47 | 17 | 30 | 46 | 17 | 29 | 106809.812 | -0.0355 |
| 47 | 17 | 31 | 46 | 17 | 30 | 106809.812 | -0.0344 |
| 47 | 16 | 32 | 46 | 16 | 31 | 106989.468 | -0.0026 |
| 47 | 16 | 31 | 46 | 16 | 30 | 106989.468 | -0.0218 |
| 45 | 9  | 36 | 44 | 9  | 35 | 107047.444 | -0.0204 |
| 52 | 2  | 50 | 51 | 2  | 49 | 107082.226 | -0.0039 |
| 52 | 3  | 50 | 51 | 3  | 49 | 107082.226 | -0.0039 |
| 46 | 11 | 35 | 45 | 11 | 34 | 107205.535 | 0.0073  |
| 47 | 15 | 33 | 46 | 15 | 32 | 107212.789 | 0.1103  |

|    |    |    |    |    |    |            |         |
|----|----|----|----|----|----|------------|---------|
| 47 | 15 | 32 | 46 | 15 | 31 | 107212.789 | -0.1713 |
| 47 | 9  | 39 | 46 | 9  | 38 | 107329.699 | -0.0032 |
| 53 | 2  | 52 | 52 | 2  | 51 | 107426.874 | 0.0201  |
| 53 | 1  | 52 | 52 | 1  | 51 | 107426.874 | 0.0201  |
| 47 | 14 | 33 | 46 | 14 | 32 | 107500.098 | -0.0107 |
| 48 | 8  | 41 | 47 | 8  | 40 | 107674.162 | -0.0285 |
| 54 | 1  | 54 | 53 | 1  | 53 | 107775.086 | -0.0068 |
| 54 | 0  | 54 | 53 | 0  | 53 | 107775.086 | -0.0068 |
| 47 | 13 | 35 | 46 | 13 | 34 | 107862.295 | 0.0213  |
| 49 | 7  | 43 | 48 | 7  | 42 | 107863.513 | -0.001  |
| 49 | 6  | 43 | 48 | 6  | 42 | 107873.757 | -0.0024 |
| 47 | 13 | 34 | 46 | 13 | 33 | 107896.23  | 0.0049  |
| 48 | 39 | 9  | 47 | 39 | 8  | 107984.489 | -0.0058 |
| 48 | 37 | 12 | 47 | 37 | 11 | 108016.453 | -0.0488 |
| 48 | 36 | 12 | 47 | 36 | 11 | 108034.217 | -0.0385 |
| 48 | 34 | 15 | 47 | 34 | 14 | 108074.006 | 0.0047  |
| 48 | 34 | 14 | 47 | 34 | 13 | 108074.006 | 0.0047  |
| 48 | 33 | 16 | 47 | 33 | 15 | 108096.363 | 0.0037  |
| 48 | 33 | 15 | 47 | 33 | 14 | 108096.363 | 0.0037  |
| 50 | 6  | 45 | 49 | 6  | 44 | 108108.387 | 0.1045  |
| 50 | 5  | 45 | 49 | 5  | 44 | 108108.66  | -0.0994 |
| 48 | 31 | 17 | 47 | 31 | 16 | 108147.199 | 0.012   |
| 48 | 31 | 18 | 47 | 31 | 17 | 108147.199 | 0.012   |
| 48 | 30 | 18 | 47 | 30 | 17 | 108176.298 | 0.0639  |

|    |    |    |    |    |    |            |         |
|----|----|----|----|----|----|------------|---------|
| 48 | 30 | 19 | 47 | 30 | 18 | 108176.298 | 0.0639  |
| 48 | 29 | 20 | 47 | 29 | 19 | 108208.196 | 0.0212  |
| 48 | 29 | 19 | 47 | 29 | 18 | 108208.196 | 0.0212  |
| 48 | 28 | 20 | 47 | 28 | 19 | 108243.42  | -0.0277 |
| 48 | 28 | 21 | 47 | 28 | 20 | 108243.42  | -0.0277 |
| 48 | 27 | 21 | 47 | 27 | 20 | 108282.604 | 0.0304  |
| 48 | 27 | 22 | 47 | 27 | 21 | 108282.604 | 0.0304  |
| 47 | 12 | 36 | 46 | 12 | 35 | 108296.938 | -0.0128 |
| 48 | 26 | 23 | 47 | 26 | 22 | 108326.187 | 0.0019  |
| 48 | 26 | 22 | 47 | 26 | 21 | 108326.187 | 0.0019  |
| 48 | 25 | 23 | 47 | 25 | 22 | 108375.054 | 0.0054  |
| 48 | 25 | 24 | 47 | 25 | 23 | 108375.054 | 0.0054  |
| 47 | 10 | 38 | 46 | 10 | 37 | 108389.604 | -0.0168 |
| 51 | 4  | 47 | 50 | 4  | 46 | 108402.594 | -0.0155 |
| 51 | 5  | 47 | 50 | 5  | 46 | 108402.594 | -0.0002 |
| 48 | 24 | 24 | 47 | 24 | 23 | 108430.082 | -0.0207 |
| 48 | 24 | 25 | 47 | 24 | 24 | 108430.082 | -0.0207 |
| 47 | 8  | 39 | 46 | 8  | 38 | 108482.734 | -0.0103 |
| 48 | 23 | 26 | 47 | 23 | 25 | 108492.533 | 0.0205  |
| 48 | 23 | 25 | 47 | 23 | 24 | 108492.533 | 0.0205  |
| 47 | 12 | 35 | 46 | 12 | 34 | 108554.818 | 0.0232  |
| 48 | 22 | 27 | 47 | 22 | 26 | 108563.747 | 0.0054  |
| 48 | 22 | 26 | 47 | 22 | 25 | 108563.747 | 0.0054  |
| 47 | 11 | 37 | 46 | 11 | 36 | 108618.131 | 0.01    |

|    |    |    |    |    |    |            |         |
|----|----|----|----|----|----|------------|---------|
| 48 | 21 | 28 | 47 | 21 | 27 | 108645.643 | -0.0028 |
| 48 | 21 | 27 | 47 | 21 | 26 | 108645.643 | -0.0028 |
| 52 | 3  | 49 | 51 | 3  | 48 | 108724.679 | -0.0268 |
| 52 | 4  | 49 | 51 | 4  | 48 | 108724.679 | -0.0265 |
| 48 | 20 | 28 | 47 | 20 | 27 | 108740.649 | 0.023   |
| 48 | 20 | 29 | 47 | 20 | 28 | 108740.649 | 0.023   |
| 48 | 19 | 30 | 47 | 19 | 29 | 108851.861 | 0.0181  |
| 48 | 19 | 29 | 47 | 19 | 28 | 108851.861 | 0.0181  |
| 48 | 18 | 31 | 47 | 18 | 30 | 108983.545 | -0.008  |
| 48 | 18 | 30 | 47 | 18 | 29 | 108983.545 | -0.0081 |
| 46 | 10 | 36 | 45 | 10 | 35 | 109060.152 | -0.0205 |
| 53 | 3  | 51 | 52 | 3  | 50 | 109061.776 | -0.0038 |
| 53 | 2  | 51 | 52 | 2  | 50 | 109061.776 | -0.0038 |
| 48 | 17 | 31 | 47 | 17 | 30 | 109141.653 | -0.008  |
| 48 | 17 | 32 | 47 | 17 | 31 | 109141.653 | -0.0057 |
| 46 | 9  | 37 | 45 | 9  | 36 | 109225.603 | -0.0532 |
| 48 | 16 | 33 | 47 | 16 | 32 | 109334.659 | 0.0175  |
| 48 | 16 | 32 | 47 | 16 | 31 | 109334.659 | -0.0192 |
| 48 | 9  | 40 | 47 | 9  | 39 | 109365.46  | -0.0288 |
| 54 | 2  | 53 | 53 | 2  | 52 | 109406.609 | 0.0303  |

---

### S3.3 Linelist for CHT-1-CN-2 in vibrational ground state

Measured frequencies and residuals (in MHz) for the rotational transitions of CHT-1-CN-1 in 2-26 GHz using SPFIT/SPCAT suite of programs from Pickett.

| <i>J</i> | <i>K<sub>a</sub></i> | <i>K<sub>c</sub></i> | <i>F</i> | <i>J'</i> | <i>K'<sub>a</sub></i> | <i>K'<sub>c</sub></i> | <i>F'</i> | Observed<br>Freq. (MHz) | Residuals<br>(MHz) |
|----------|----------------------|----------------------|----------|-----------|-----------------------|-----------------------|-----------|-------------------------|--------------------|
| 5        | 3                    | 3                    | 6        | 5         | 2                     | 3                     | 6         | 2535.9323               | 0.0153             |
| 5        | 3                    | 3                    | 5        | 5         | 2                     | 3                     | 5         | 2536.4583               | 0.0125             |
| 4        | 3                    | 2                    | 3        | 4         | 2                     | 2                     | 3         | 2750.3573               | 0.0224             |
| 4        | 3                    | 2                    | 5        | 4         | 2                     | 2                     | 5         | 2750.4636               | 0.0204             |
| 4        | 3                    | 2                    | 4        | 4         | 2                     | 2                     | 4         | 2750.874                | 0.0095             |
| 3        | 3                    | 1                    | 3        | 3         | 2                     | 1                     | 4         | 2880.2676               | 0.0095             |
| 3        | 3                    | 1                    | 2        | 3         | 2                     | 1                     | 2         | 2880.2676               | 0.0049             |
| 3        | 3                    | 1                    | 4        | 3         | 2                     | 1                     | 4         | 2880.3624               | 0.0054             |
| 3        | 3                    | 1                    | 4        | 3         | 2                     | 1                     | 4         | 2880.3624               | 0.0054             |
| 3        | 3                    | 1                    | 3        | 3         | 2                     | 1                     | 3         | 2880.617                | -0.0088            |
| 3        | 3                    | 1                    | 3        | 3         | 2                     | 1                     | 3         | 2880.617                | -0.0088            |
| 1        | 1                    | 0                    | 1        | 0         | 0                     | 0                     | 1         | 3934.3653               | -0.0025            |
| 1        | 1                    | 0                    | 2        | 0         | 0                     | 0                     | 1         | 3935.0474               | -0.0038            |
| 2        | 1                    | 2                    | 1        | 1         | 1                     | 1                     | 1         | 6422.7084               | 0.0197             |
| 2        | 1                    | 2                    | 3        | 1         | 1                     | 1                     | 2         | 6423.7544               | 0.015              |
| 2        | 1                    | 2                    | 2        | 1         | 1                     | 1                     | 1         | 6423.7544               | -0.0732            |
| 2        | 1                    | 2                    | 1        | 1         | 1                     | 1                     | 0         | 6424.3086               | 0.0099             |

|   |   |   |   |   |   |   |   |            |         |
|---|---|---|---|---|---|---|---|------------|---------|
| 2 | 1 | 2 | 2 | 1 | 1 | 1 | 2 | 6424.4843  | 0.0127  |
| 2 | 0 | 2 | 1 | 1 | 0 | 1 | 1 | 6531.8899  | 0.0024  |
| 2 | 0 | 2 | 3 | 1 | 0 | 1 | 2 | 6532.0343  | 0       |
| 2 | 0 | 2 | 1 | 1 | 0 | 1 | 0 | 6532.196   | 0.2102  |
| 2 | 0 | 2 | 2 | 1 | 0 | 1 | 1 | 6532.196   | 0.0077  |
| 2 | 1 | 1 | 1 | 1 | 1 | 0 | 0 | 6681.498   | -0.0306 |
| 2 | 1 | 1 | 2 | 1 | 1 | 0 | 2 | 6681.498   | 0.0177  |
| 2 | 1 | 1 | 2 | 1 | 1 | 0 | 1 | 6682.164   | 0.0003  |
| 2 | 1 | 1 | 3 | 1 | 1 | 0 | 2 | 6682.164   | -0.0064 |
| 2 | 1 | 1 | 1 | 1 | 1 | 0 | 1 | 6683.2225  | -0.0147 |
| 2 | 1 | 1 | 2 | 1 | 0 | 1 | 1 | 7340.0097  | -0.0026 |
| 2 | 1 | 1 | 2 | 1 | 0 | 1 | 2 | 7340.0097  | -0.0419 |
| 2 | 1 | 1 | 3 | 1 | 0 | 1 | 2 | 7340.7255  | -0.0161 |
| 2 | 1 | 1 | 1 | 1 | 0 | 1 | 1 | 7341.0543  | -0.0314 |
| 2 | 1 | 1 | 1 | 1 | 0 | 1 | 0 | 7341.1474  | -0.0366 |
| 2 | 1 | 1 | 1 | 1 | 0 | 1 | 0 | 7341.1668  | -0.0173 |
| 2 | 2 | 0 | 1 | 1 | 1 | 0 | 0 | 8289.895   | 0.0152  |
| 2 | 2 | 0 | 2 | 1 | 1 | 0 | 2 | 8290.6048  | 0.0009  |
| 2 | 2 | 0 | 3 | 1 | 1 | 0 | 2 | 8290.8041  | 0.0069  |
| 2 | 2 | 0 | 2 | 1 | 1 | 0 | 1 | 8291.2876  | 0.0003  |
| 2 | 2 | 0 | 1 | 1 | 1 | 0 | 1 | 8291.5883  | -0.0001 |
| 2 | 2 | 1 | 2 | 1 | 1 | 1 | 1 | 8398.5642  | -0.0153 |
| 2 | 2 | 1 | 3 | 1 | 1 | 1 | 2 | 8399.2383  | -0.0274 |
| 5 | 1 | 4 | 5 | 4 | 0 | 4 | 4 | 18050.0279 | -0.0214 |



|   |   |   |   |   |   |   |   |            |         |
|---|---|---|---|---|---|---|---|------------|---------|
| 5 | 1 | 4 | 6 | 4 | 0 | 4 | 5 | 18051.0793 | -0.0369 |
| 5 | 1 | 4 | 4 | 4 | 0 | 4 | 3 | 18051.3617 | -0.0063 |
| 5 | 2 | 3 | 4 | 4 | 1 | 3 | 3 | 18114.9144 | 0.0424  |
| 5 | 2 | 3 | 6 | 4 | 1 | 3 | 5 | 18114.9144 | 0.0334  |
| 5 | 2 | 3 | 5 | 4 | 1 | 3 | 4 | 18114.9144 | 0.136   |
| 5 | 2 | 4 | 5 | 4 | 1 | 4 | 4 | 18794.6862 | -0.0205 |
| 6 | 1 | 6 | 7 | 5 | 1 | 5 | 6 | 19152.8237 | -0.0303 |
| 6 | 1 | 6 | 6 | 5 | 1 | 5 | 5 | 19152.8237 | -0.1048 |
| 6 | 1 | 6 | 5 | 5 | 1 | 5 | 4 | 19152.8237 | -0.0517 |
| 6 | 0 | 6 | 6 | 5 | 0 | 5 | 5 | 19202.0918 | -0.16   |
| 6 | 0 | 6 | 7 | 5 | 0 | 5 | 6 | 19202.0918 | -0.0152 |
| 6 | 0 | 6 | 5 | 5 | 0 | 5 | 4 | 19202.0918 | -0.02   |
| 5 | 3 | 2 | 6 | 4 | 2 | 2 | 5 | 19242.2858 | 0.0577  |
| 5 | 3 | 2 | 5 | 4 | 2 | 2 | 4 | 19242.5437 | 0.0392  |
| 5 | 3 | 3 | 4 | 4 | 2 | 3 | 5 | 19468.4489 | -0.035  |
| 5 | 3 | 3 | 6 | 4 | 2 | 3 | 5 | 19468.4489 | -0.0076 |
| 6 | 2 | 5 | 6 | 5 | 2 | 4 | 5 | 19566.1049 | -0.0966 |
| 6 | 2 | 5 | 5 | 5 | 2 | 4 | 4 | 19566.1049 | -0.0068 |
| 6 | 2 | 5 | 7 | 5 | 2 | 4 | 6 | 19566.1049 | -0.016  |
| 6 | 3 | 4 | 6 | 5 | 3 | 3 | 5 | 19723.756  | 0.0082  |
| 6 | 3 | 4 | 7 | 5 | 3 | 3 | 6 | 19723.756  | 0.0072  |
| 6 | 3 | 4 | 5 | 5 | 3 | 3 | 4 | 19723.756  | 0.0117  |
| 6 | 4 | 3 | 5 | 5 | 4 | 2 | 4 | 19727.7319 | 0.036   |
| 6 | 4 | 3 | 6 | 5 | 4 | 2 | 5 | 19727.7319 | 0.0642  |

|   |   |   |   |   |   |   |   |            |         |
|---|---|---|---|---|---|---|---|------------|---------|
| 6 | 4 | 3 | 7 | 5 | 4 | 2 | 6 | 19727.7319 | 0.0364  |
| 6 | 4 | 2 | 6 | 5 | 4 | 1 | 5 | 19734.0422 | 0.0342  |
| 6 | 4 | 2 | 7 | 5 | 4 | 1 | 6 | 19734.0422 | -0.0064 |
| 6 | 4 | 2 | 5 | 5 | 4 | 1 | 4 | 19734.0422 | -0.0087 |
| 6 | 1 | 5 | 6 | 5 | 1 | 4 | 5 | 19822.5106 | -0.0803 |
| 6 | 1 | 5 | 7 | 5 | 1 | 4 | 6 | 19822.5106 | 0.1037  |
| 6 | 1 | 5 | 5 | 5 | 1 | 4 | 4 | 19822.5106 | 0.1495  |
| 6 | 3 | 3 | 5 | 5 | 3 | 2 | 4 | 19829.1122 | 0.0175  |
| 6 | 3 | 3 | 6 | 5 | 3 | 2 | 5 | 19829.1122 | 0.1567  |
| 6 | 3 | 3 | 7 | 5 | 3 | 2 | 6 | 19829.1122 | 0.0297  |
| 6 | 2 | 4 | 5 | 5 | 2 | 3 | 4 | 20016.0724 | 0.0353  |
| 6 | 2 | 4 | 6 | 5 | 2 | 3 | 5 | 20016.0724 | 0.0717  |
| 6 | 2 | 4 | 7 | 5 | 2 | 3 | 6 | 20016.0724 | 0.0207  |
| 5 | 4 | 1 | 4 | 4 | 3 | 1 | 5 | 20540.6235 | -0.0031 |
| 5 | 4 | 1 | 6 | 4 | 3 | 1 | 5 | 20540.6235 | 0.0235  |
| 5 | 4 | 1 | 4 | 4 | 3 | 1 | 3 | 20540.6235 | 0.041   |
| 5 | 4 | 2 | 4 | 4 | 3 | 2 | 3 | 20553.7784 | 0.0108  |
| 5 | 4 | 2 | 5 | 4 | 3 | 2 | 4 | 20553.7784 | 0.01    |
| 5 | 4 | 2 | 6 | 4 | 3 | 2 | 5 | 20553.7784 | 0.0053  |
| 6 | 2 | 4 | 6 | 5 | 1 | 4 | 5 | 21540.1652 | 0.0154  |
| 6 | 2 | 4 | 7 | 5 | 1 | 4 | 6 | 21540.4797 | 0.0395  |
| 6 | 2 | 4 | 5 | 5 | 1 | 4 | 4 | 21540.4797 | 0.0053  |
| 5 | 5 | 0 | 5 | 4 | 4 | 0 | 4 | 21730.4295 | 0.0864  |
| 5 | 5 | 1 | 4 | 4 | 4 | 1 | 3 | 21730.4295 | -0.0744 |

|   |   |   |   |   |   |   |   |            |         |
|---|---|---|---|---|---|---|---|------------|---------|
| 5 | 5 | 1 | 6 | 4 | 4 | 1 | 5 | 21730.4295 | -0.08   |
| 5 | 5 | 0 | 4 | 4 | 4 | 0 | 3 | 21730.4295 | 0.0942  |
| 5 | 5 | 0 | 6 | 4 | 4 | 0 | 5 | 21730.4295 | 0.0884  |
| 5 | 5 | 1 | 5 | 4 | 4 | 1 | 4 | 21730.4295 | -0.0812 |
| 6 | 1 | 5 | 6 | 5 | 0 | 5 | 5 | 21804.8257 | -0.0237 |
| 6 | 1 | 5 | 5 | 5 | 0 | 5 | 4 | 21806.0348 | -0.1048 |
| 6 | 1 | 5 | 7 | 5 | 0 | 5 | 6 | 21806.0348 | 0.1066  |
| 6 | 3 | 3 | 7 | 5 | 2 | 3 | 6 | 22422.2774 | -0.0877 |
| 6 | 3 | 3 | 5 | 5 | 2 | 3 | 4 | 22422.2774 | -0.0188 |
| 6 | 3 | 3 | 7 | 5 | 2 | 3 | 6 | 22422.2784 | -0.0867 |
| 6 | 3 | 3 | 5 | 5 | 2 | 3 | 4 | 22422.2784 | -0.0178 |
| 6 | 3 | 3 | 6 | 5 | 2 | 3 | 5 | 22422.6536 | 0.0174  |
| 6 | 3 | 3 | 6 | 5 | 2 | 3 | 5 | 22422.6536 | 0.0174  |
| 6 | 3 | 4 | 6 | 5 | 2 | 4 | 5 | 22856.0284 | -0.0647 |
| 6 | 3 | 4 | 7 | 5 | 2 | 4 | 6 | 22856.3461 | -0.0076 |
| 7 | 4 | 3 | 8 | 6 | 4 | 2 | 7 | 23051.6518 | -0.0358 |
| 7 | 4 | 3 | 6 | 6 | 4 | 2 | 5 | 23051.6518 | -0.0398 |
| 7 | 4 | 3 | 7 | 6 | 4 | 2 | 6 | 23051.6518 | 0.021   |
| 7 | 3 | 4 | 8 | 6 | 3 | 3 | 7 | 23213.499  | -0.03   |
| 7 | 3 | 4 | 6 | 6 | 3 | 3 | 5 | 23213.499  | -0.0408 |
| 7 | 3 | 4 | 7 | 6 | 3 | 3 | 6 | 23213.499  | 0.1121  |
| 7 | 2 | 5 | 6 | 6 | 2 | 4 | 5 | 23355.2002 | 0.0479  |
| 7 | 2 | 5 | 7 | 6 | 2 | 4 | 6 | 23355.2002 | 0.0125  |
| 7 | 2 | 5 | 8 | 6 | 2 | 4 | 7 | 23355.2002 | 0.028   |

|   |   |   |   |   |   |   |   |            |         |
|---|---|---|---|---|---|---|---|------------|---------|
| 6 | 4 | 3 | 5 | 5 | 3 | 3 | 4 | 23847.0088 | -0.0389 |
| 6 | 4 | 3 | 6 | 5 | 3 | 3 | 5 | 23847.0088 | -0.0224 |
| 6 | 4 | 3 | 7 | 5 | 3 | 3 | 6 | 23847.0088 | -0.0406 |
| 6 | 5 | 1 | 6 | 5 | 4 | 1 | 5 | 25011.9503 | -0.0185 |
| 6 | 5 | 1 | 5 | 5 | 4 | 1 | 4 | 25011.9503 | -0.0012 |
| 6 | 5 | 1 | 7 | 5 | 4 | 1 | 6 | 25011.9503 | -0.0076 |
| 6 | 5 | 2 | 5 | 5 | 4 | 2 | 4 | 25013.427  | 0.0029  |
| 6 | 5 | 2 | 7 | 5 | 4 | 2 | 6 | 25013.427  | -0.0026 |
| 6 | 5 | 2 | 6 | 5 | 4 | 2 | 5 | 25013.427  | -0.0088 |

---

## **S4.0 The experimental rotational constants for the heavy-atom isotopologues**

Experimental rotational constants obtained for the observed isotopologues of CHT-1-CN-1. Parameters are obtained by using the SPFIT program for the 2-26 GHz region.

| Rotational parameters | $^{13}\text{C1}$ | $^{13}\text{C2}$ | $^{13}\text{C3}$ | $^{13}\text{C4}$ | $^{13}\text{C8}$ | $^{15}\text{N7}$ |
|-----------------------|------------------|------------------|------------------|------------------|------------------|------------------|
| $A^a$ /MHz            | 3536.684(45)     | 3497.122(23)     | 3480.336(25)     | 3523.275(27)     | 3536.827(64)     | 3537.177(34)     |
| B (MHz)               | 1249.65504(70)   | 1250.77571(70)   | 1247.06586(48)   | 1237.20758(55)   | 1236.6123(12)    | 1217.87199(73)   |
| C (MHz)               | 989.65546(53)    | 987.70952(45)    | 983.63065(36)    | 981.12660(47)    | 981.4223(12)     | 969.55357(64)    |
| $\Delta_J^b$ /kHz     | [0.055512]       | [0.055512]       | [0.055512]       | [0.055512]       | [0.055512]       | [0.055512]       |
| $\Delta_{JK}$ /kHz    | [0.20096]        | [0.20096]        | [0.20096]        | [0.20096]        | [0.20096]        | [0.20096]        |
| $\Delta_K$ /kHz       | [0.83]           | [0.83]           | [0.83]           | [0.83]           | [0.83]           | [0.83]           |
| $\delta_J$ /kHz       | [-0.0067]        | [-0.0067]        | [-0.0067]        | [-0.0067]        | [-0.0067]        | [-0.0067]        |
| $\delta_K$ /kHz       | [-0.27771]       | [-0.27771]       | [-0.27771]       | [-0.27771]       | [-0.27771]       | [-0.27771]       |
| $\chi_{aa}^c$ /MHz    | -4.245(14)       | -4.242(14)       | -4.241(10)       | -4.241(13)       | -4.234(22)       | -                |
| $\chi_{bb-cc}$ /MHz   | [0.00772]        | [0.00772]        | [0.00772]        | [0.00772]        | [0.00772]        | -                |

<sup>a</sup> A, B, and C are the rotational constants

<sup>b</sup>  $\Delta_J$ ,  $\Delta_{JK}$ ,  $\Delta_K$ ,  $\delta_J$ , and  $\delta_K$  are the quartic centrifugal distortion constants.

<sup>c</sup>  $\chi_{aa}$ ,  $\chi_{bb}$ , and  $\chi_{cc}$  represent the diagonal elements of the  $^{14}\text{N}$  nuclear quadrupole coupling tensor.

**S5.0 List of rotational transitions for singly-substituted  
heavy-atom isotopologues of CHT-1-CN-1**

**S5.1 Measured frequencies and residuals (in MHz) for the rotational transitions of  $^{13}\text{C}1$  CHT-1-CN-1 in the low-frequency region (2-26 GHz) fit using SPFIT/SPCAT suite of programs from Pickett.**

| $J$ | $K_a$ | $K_c$ | $F$ | $J'$ | $K'_a$ | $K'_c$ | $F'$ | Observed Freq. (MHz) | Residuals (MHz) |
|-----|-------|-------|-----|------|--------|--------|------|----------------------|-----------------|
| 2   | 1     | 2     | 2   | 1    | 1      | 1      | 1    | 4217.569             | 0.0094          |
| 2   | 1     | 2     | 2   | 1    | 1      | 1      | 2    | 4218.2176            | 0.0101          |
| 2   | 1     | 2     | 1   | 1    | 1      | 1      | 1    | 4218.6048            | 0.0028          |
| 2   | 1     | 2     | 3   | 1    | 1      | 1      | 2    | 4218.8818            | 0.0047          |
| 2   | 1     | 2     | 1   | 1    | 1      | 1      | 0    | 4220.2262            | 0.0041          |
| 2   | 0     | 2     | 2   | 1    | 0      | 1      | 2    | 4456.4201            | -0.0012         |
| 2   | 0     | 2     | 1   | 1    | 0      | 1      | 0    | 4456.6241            | 0.0018          |
| 2   | 0     | 2     | 2   | 1    | 0      | 1      | 1    | 4457.7011            | 0.0067          |
| 2   | 0     | 2     | 3   | 1    | 0      | 1      | 2    | 4457.7789            | 0.0008          |
| 3   | 1     | 3     | 3   | 2    | 1      | 2      | 3    | 6314.4095            | 0.0088          |
| 3   | 1     | 3     | 3   | 2    | 1      | 2      | 2    | 6315.0769            | 0.0065          |
| 3   | 1     | 3     | 4   | 2    | 1      | 2      | 3    | 6315.4516            | 0.0048          |
| 3   | 1     | 3     | 2   | 2    | 1      | 2      | 1    | 6315.4516            | 0.0112          |
| 3   | 1     | 3     | 2   | 2    | 1      | 2      | 2    | 6316.4871            | 0.0043          |
| 3   | 0     | 3     | 3   | 2    | 0      | 2      | 3    | 6633.7413            | -0.0007         |

|   |   |   |   |   |   |   |   |            |         |
|---|---|---|---|---|---|---|---|------------|---------|
| 3 | 0 | 3 | 2 | 2 | 0 | 2 | 1 | 6634.8759  | 0.0027  |
| 3 | 0 | 3 | 3 | 2 | 0 | 2 | 2 | 6635.1298  | 0.0308  |
| 3 | 0 | 3 | 4 | 2 | 0 | 2 | 3 | 6635.1298  | -0.0087 |
| 3 | 2 | 2 | 2 | 2 | 2 | 1 | 2 | 6716.8704  | 0.0102  |
| 3 | 2 | 2 | 3 | 2 | 2 | 1 | 2 | 6716.8704  | 0.0105  |
| 3 | 2 | 2 | 4 | 2 | 2 | 1 | 3 | 6718.2374  | 0.0135  |
| 3 | 2 | 1 | 3 | 2 | 2 | 0 | 2 | 6799.6775  | -0.0088 |
| 3 | 2 | 1 | 4 | 2 | 2 | 0 | 3 | 6801.0652  | 0.0038  |
| 3 | 2 | 1 | 2 | 2 | 2 | 0 | 1 | 6801.8184  | -0.0037 |
| 3 | 1 | 2 | 3 | 2 | 1 | 1 | 3 | 7093.3044  | -0.0085 |
| 3 | 1 | 2 | 3 | 2 | 1 | 1 | 2 | 7093.9992  | -0.0083 |
| 3 | 1 | 2 | 2 | 2 | 1 | 1 | 1 | 7094.3753  | 0.0021  |
| 3 | 1 | 2 | 4 | 2 | 1 | 1 | 3 | 7094.3753  | -0.009  |
| 4 | 1 | 4 | 4 | 3 | 1 | 3 | 3 | 8398.2591  | 0.0018  |
| 4 | 1 | 4 | 5 | 3 | 1 | 3 | 4 | 8398.4208  | -0.0019 |
| 4 | 1 | 4 | 3 | 3 | 1 | 3 | 2 | 8398.4208  | 0.0528  |
| 4 | 0 | 4 | 3 | 3 | 0 | 3 | 2 | 8755.5259  | 0.0037  |
| 4 | 0 | 4 | 4 | 3 | 0 | 3 | 3 | 8755.6445  | 0.0158  |
| 4 | 0 | 4 | 5 | 3 | 0 | 3 | 4 | 8755.6445  | -0.0028 |
| 4 | 1 | 3 | 4 | 3 | 1 | 2 | 3 | 9431.9215  | -0.0109 |
| 4 | 1 | 3 | 3 | 3 | 1 | 2 | 2 | 9432.0215  | -0.0185 |
| 4 | 1 | 3 | 5 | 3 | 1 | 2 | 4 | 9432.0954  | -0.0018 |
| 8 | 1 | 7 | 8 | 7 | 1 | 6 | 7 | 18408.8893 | 0.0061  |
| 8 | 1 | 7 | 9 | 7 | 1 | 6 | 8 | 18408.8893 | -0.0082 |



|    |   |    |    |    |   |    |    |            |         |
|----|---|----|----|----|---|----|----|------------|---------|
| 8  | 1 | 7  | 7  | 7  | 1 | 6  | 6  | 18408.8893 | 0.0156  |
| 9  | 1 | 9  | 9  | 8  | 1 | 8  | 8  | 18577.3425 | 0.0299  |
| 9  | 1 | 9  | 10 | 8  | 1 | 8  | 9  | 18577.3425 | 0.0127  |
| 9  | 1 | 9  | 8  | 8  | 1 | 8  | 7  | 18577.3425 | 0.0308  |
| 9  | 0 | 9  | 8  | 8  | 0 | 8  | 7  | 18694.1156 | 0.0459  |
| 9  | 0 | 9  | 9  | 8  | 0 | 8  | 8  | 18694.1156 | 0.0323  |
| 9  | 0 | 9  | 10 | 8  | 0 | 8  | 9  | 18694.1156 | 0.0262  |
| 8  | 2 | 6  | 8  | 7  | 2 | 5  | 7  | 18823.3409 | 0.055   |
| 8  | 2 | 6  | 7  | 7  | 2 | 5  | 6  | 18823.3409 | -0.0106 |
| 8  | 2 | 6  | 9  | 7  | 2 | 5  | 8  | 18823.3409 | 0.055   |
| 10 | 1 | 10 | 9  | 9  | 1 | 9  | 8  | 20576.0341 | -0.0315 |
| 10 | 1 | 10 | 11 | 9  | 1 | 9  | 10 | 20576.0341 | -0.0463 |
| 10 | 1 | 10 | 10 | 9  | 1 | 9  | 9  | 20576.0341 | -0.0333 |
| 10 | 0 | 10 | 11 | 9  | 0 | 9  | 10 | 20652.1322 | -0.0312 |
| 10 | 0 | 10 | 10 | 9  | 0 | 9  | 9  | 20652.1322 | -0.0245 |
| 10 | 0 | 10 | 9  | 9  | 0 | 9  | 8  | 20652.1322 | -0.0155 |
| 11 | 1 | 11 | 11 | 10 | 1 | 10 | 10 | 22568.0764 | -0.0094 |
| 11 | 1 | 11 | 12 | 10 | 1 | 10 | 11 | 22568.0764 | -0.0197 |
| 11 | 1 | 11 | 10 | 10 | 1 | 10 | 9  | 22568.0764 | -0.0073 |

---

**S5.2 Measured frequencies and residuals (in MHz) for the rotational transitions of  $^{13}\text{C}_2$  CHT-1-CN-1 in the low-frequency region (2-26 GHz) fit using SPFIT/SPCAT suite of programs from Pickett.**

| $J$ | $K_a$ | $K_c$ | $F$ | $J'$ | $K'_a$ | $K'_c$ | $F'$ | Observed Freq. (MHz) | Residuals (MHz) |
|-----|-------|-------|-----|------|--------|--------|------|----------------------|-----------------|
| 2   | 1     | 2     | 2   | 1    | 1      | 1      | 2    | 4213.4936            | 0.0029          |
| 2   | 1     | 2     | 1   | 1    | 1      | 1      | 1    | 4213.8868            | 0.0019          |
| 2   | 1     | 2     | 3   | 1    | 1      | 1      | 2    | 4214.1633            | 0.0034          |
| 2   | 0     | 2     | 2   | 1    | 0      | 1      | 2    | 4453.926             | 0.001           |
| 2   | 0     | 2     | 1   | 1    | 0      | 1      | 0    | 4454.1273            | 0.0019          |
| 2   | 0     | 2     | 2   | 1    | 0      | 1      | 1    | 4455.2056            | 0.0081          |
| 2   | 0     | 2     | 3   | 1    | 0      | 1      | 2    | 4455.2841            | 0.0032          |
| 2   | 0     | 2     | 1   | 1    | 0      | 1      | 1    | 4457.3099            | 0.0027          |
| 2   | 1     | 1     | 2   | 1    | 1      | 0      | 1    | 4738.9744            | 0.0016          |
| 2   | 1     | 1     | 3   | 1    | 1      | 0      | 2    | 4740.2914            | 0.0001          |
| 3   | 1     | 3     | 3   | 2    | 1      | 2      | 3    | 6306.8342            | 0.0047          |
| 3   | 1     | 3     | 3   | 2    | 1      | 2      | 2    | 6307.503             | 0.0043          |
| 3   | 1     | 3     | 2   | 2    | 1      | 2      | 1    | 6307.8779            | 0.0094          |
| 3   | 1     | 3     | 4   | 2    | 1      | 2      | 3    | 6307.8779            | 0.0031          |
| 3   | 1     | 3     | 2   | 2    | 1      | 2      | 2    | 6308.9144            | 0.004           |
| 3   | 0     | 3     | 3   | 2    | 0      | 2      | 3    | 6627.9741            | 0.0053          |
| 3   | 0     | 3     | 2   | 2    | 0      | 2      | 1    | 6629.1027            | 0.0044          |
| 3   | 0     | 3     | 3   | 2    | 0      | 2      | 2    | 6629.357             | 0.0324          |

|   |   |   |    |   |   |   |   |            |         |
|---|---|---|----|---|---|---|---|------------|---------|
| 3 | 0 | 3 | 4  | 2 | 0 | 2 | 3 | 6629.357   | -0.0065 |
| 3 | 0 | 3 | 2  | 2 | 0 | 2 | 2 | 6631.2104  | 0.0024  |
| 3 | 2 | 2 | 3  | 2 | 2 | 1 | 2 | 6714.3888  | 0.0042  |
| 3 | 2 | 2 | 4  | 2 | 2 | 1 | 3 | 6715.7507  | 0.0027  |
| 3 | 2 | 2 | 2  | 2 | 2 | 1 | 1 | 6716.5073  | 0.0015  |
| 3 | 2 | 1 | 3  | 2 | 2 | 0 | 2 | 6800.5043  | -0.0054 |
| 3 | 2 | 1 | 4  | 2 | 2 | 0 | 3 | 6801.8848  | 0.0001  |
| 3 | 2 | 1 | 2  | 2 | 2 | 0 | 1 | 6802.6429  | -0.0021 |
| 3 | 1 | 2 | 3  | 2 | 1 | 1 | 3 | 7094.8664  | -0.0008 |
| 3 | 1 | 2 | 3  | 2 | 1 | 1 | 2 | 7095.5592  | -0.0021 |
| 3 | 1 | 2 | 4  | 2 | 1 | 1 | 3 | 7095.9329  | -0.005  |
| 3 | 1 | 2 | 2  | 2 | 1 | 1 | 1 | 7095.9329  | 0.0062  |
| 4 | 1 | 4 | 4  | 3 | 1 | 3 | 3 | 8387.3316  | -0.0021 |
| 4 | 1 | 4 | 5  | 3 | 1 | 3 | 4 | 8387.4965  | -0.0025 |
| 8 | 1 | 7 | 9  | 7 | 1 | 6 | 8 | 18389.6765 | 0.0149  |
| 8 | 1 | 7 | 7  | 7 | 1 | 6 | 6 | 18389.6765 | 0.0387  |
| 8 | 1 | 7 | 8  | 7 | 1 | 6 | 7 | 18389.6765 | 0.0284  |
| 9 | 1 | 9 | 9  | 8 | 1 | 8 | 8 | 18544.0466 | 0.0298  |
| 9 | 1 | 9 | 8  | 8 | 1 | 8 | 7 | 18544.0466 | 0.0307  |
| 9 | 1 | 9 | 10 | 8 | 1 | 8 | 9 | 18544.0466 | 0.0127  |
| 9 | 0 | 9 | 9  | 8 | 0 | 8 | 8 | 18654.6374 | 0.0377  |
| 9 | 0 | 9 | 8  | 8 | 0 | 8 | 7 | 18654.6374 | 0.0509  |
| 9 | 0 | 9 | 10 | 8 | 0 | 8 | 9 | 18654.6374 | 0.0313  |
| 8 | 2 | 6 | 8  | 7 | 2 | 5 | 7 | 18834.6203 | 0.0854  |

|    |   |    |    |    |   |    |    |            |         |
|----|---|----|----|----|---|----|----|------------|---------|
| 8  | 2 | 6  | 9  | 7  | 2 | 5  | 8  | 18834.6203 | 0.0077  |
| 8  | 2 | 6  | 7  | 7  | 2 | 5  | 6  | 18834.6203 | 0.0205  |
| 9  | 2 | 8  | 9  | 8  | 2 | 7  | 8  | 19768.4814 | 0.0005  |
| 9  | 2 | 8  | 10 | 8  | 2 | 7  | 9  | 19768.4814 | -0.0511 |
| 9  | 2 | 8  | 8  | 8  | 2 | 7  | 7  | 19768.4814 | -0.0393 |
| 9  | 1 | 8  | 9  | 8  | 1 | 7  | 8  | 20475.0612 | -0.0226 |
| 9  | 1 | 8  | 8  | 8  | 1 | 7  | 7  | 20475.0612 | -0.0082 |
| 9  | 1 | 8  | 10 | 8  | 1 | 7  | 9  | 20475.0612 | -0.0276 |
| 10 | 1 | 10 | 11 | 9  | 1 | 9  | 10 | 20538.052  | -0.0345 |
| 10 | 1 | 10 | 10 | 9  | 1 | 9  | 9  | 20538.052  | -0.0215 |
| 10 | 1 | 10 | 9  | 9  | 1 | 9  | 8  | 20538.052  | -0.0197 |
| 10 | 0 | 10 | 10 | 9  | 0 | 9  | 9  | 20609.3114 | -0.0153 |
| 10 | 0 | 10 | 9  | 9  | 0 | 9  | 8  | 20609.3114 | -0.0066 |
| 10 | 0 | 10 | 11 | 9  | 0 | 9  | 10 | 20609.3114 | -0.0222 |
| 10 | 2 | 9  | 9  | 9  | 2 | 8  | 8  | 21864.7435 | 0.0229  |
| 10 | 2 | 9  | 11 | 9  | 2 | 8  | 10 | 21864.7435 | 0.012   |
| 10 | 2 | 9  | 10 | 9  | 2 | 8  | 9  | 21864.7435 | 0.0489  |
| 10 | 1 | 9  | 9  | 9  | 1 | 8  | 8  | 22492.0307 | 0.0095  |
| 10 | 1 | 9  | 11 | 9  | 1 | 8  | 10 | 22492.0307 | -0.0064 |
| 10 | 1 | 9  | 10 | 9  | 1 | 8  | 9  | 22492.0307 | -0.0061 |
| 11 | 1 | 11 | 10 | 10 | 1 | 10 | 9  | 22525.5209 | -0.0131 |
| 11 | 1 | 11 | 12 | 10 | 1 | 10 | 11 | 22525.5209 | -0.0254 |
| 11 | 1 | 11 | 11 | 10 | 1 | 10 | 10 | 22525.5209 | -0.0151 |
| 10 | 2 | 8  | 11 | 9  | 2 | 7  | 10 | 23562.6355 | -0.0598 |

|    |   |    |    |    |   |    |    |            |         |
|----|---|----|----|----|---|----|----|------------|---------|
| 10 | 2 | 8  | 10 | 9  | 2 | 7  | 9  | 23562.6355 | -0.0267 |
| 10 | 2 | 8  | 9  | 9  | 2 | 7  | 8  | 23562.6355 | -0.0477 |
| 11 | 1 | 10 | 12 | 10 | 1 | 9  | 11 | 24455.3063 | 0.0095  |
| 11 | 1 | 10 | 11 | 10 | 1 | 9  | 10 | 24455.3063 | 0.0082  |
| 12 | 0 | 12 | 11 | 11 | 0 | 11 | 10 | 24535.4801 | 0       |
| 12 | 0 | 12 | 12 | 11 | 0 | 11 | 11 | 24535.4801 | -0.004  |
| 12 | 0 | 12 | 13 | 11 | 0 | 11 | 12 | 24535.4801 | -0.0105 |

---

**S5.3 Measured frequencies and residuals (in MHz) for the rotational transitions of  $^{13}\text{C}_3\text{ CHT-1-CN-1}$  in the low-frequency region (2-26 GHz) fit using SPFIT/SPCAT suite of programs from Pickett.**

| $J$ | $K_a$ | $K_c$ | $F$ | $J'$ | $K'_a$ | $K'_c$ | $F'$ | Observed Freq. (MHz) | Residuals (MHz) |
|-----|-------|-------|-----|------|--------|--------|------|----------------------|-----------------|
| 2   | 1     | 2     | 2   | 1    | 1      | 1      | 1    | 4196.9008            | 0.00395         |
| 2   | 1     | 2     | 2   | 1    | 1      | 1      | 2    | 4197.5505            | 0.00616         |
| 2   | 1     | 2     | 1   | 1    | 1      | 1      | 1    | 4197.9411            | 0.00274         |
| 2   | 1     | 2     | 3   | 1    | 1      | 1      | 2    | 4198.2196            | 0.00636         |
| 2   | 1     | 2     | 1   | 1    | 1      | 1      | 0    | 4199.5631            | 0.00595         |
| 2   | 0     | 2     | 2   | 1    | 0      | 1      | 2    | 4438.1664            | -0.00209        |
| 2   | 0     | 2     | 2   | 1    | 0      | 1      | 1    | 4439.4441            | 0.0035          |
| 2   | 0     | 2     | 3   | 1    | 0      | 1      | 2    | 4439.5268            | 0.00298         |
| 2   | 0     | 2     | 1   | 1    | 0      | 1      | 1    | 4441.5539            | 0.00459         |
| 2   | 1     | 1     | 2   | 1    | 1      | 0      | 1    | 4723.7662            | 0.00148         |
| 2   | 1     | 1     | 2   | 1    | 1      | 0      | 2    | 4724.3964            | 0.00752         |
| 2   | 1     | 1     | 1   | 1    | 1      | 0      | 1    | 4724.8483            | 0.00352         |
| 2   | 1     | 1     | 3   | 1    | 1      | 0      | 2    | 4725.0857            | 0.00302         |
| 2   | 1     | 1     | 1   | 1    | 1      | 0      | 0    | 4726.4002            | -0.00526        |
| 3   | 1     | 3     | 3   | 2    | 1      | 2      | 3    | 6282.8169            | 0.01137         |
| 3   | 1     | 3     | 3   | 2    | 1      | 2      | 2    | 6283.4875            | 0.01299         |
| 3   | 1     | 3     | 2   | 2    | 1      | 2      | 1    | 6283.8599            | 0.0159          |
| 3   | 1     | 3     | 4   | 2    | 1      | 2      | 3    | 6283.8599            | 0.00954         |

|   |   |   |   |   |   |   |   |           |          |
|---|---|---|---|---|---|---|---|-----------|----------|
| 3 | 1 | 3 | 2 | 2 | 1 | 2 | 2 | 6284.8929 | 0.00736  |
| 3 | 0 | 3 | 3 | 2 | 0 | 2 | 3 | 6603.9084 | 0.00193  |
| 3 | 0 | 3 | 2 | 2 | 0 | 2 | 1 | 6605.0382 | 0.00285  |
| 3 | 0 | 3 | 3 | 2 | 0 | 2 | 2 | 6605.2917 | 0.02993  |
| 3 | 0 | 3 | 4 | 2 | 0 | 2 | 3 | 6605.2917 | -0.00888 |
| 3 | 0 | 3 | 2 | 2 | 0 | 2 | 2 | 6607.1417 | -0.00246 |
| 3 | 2 | 2 | 2 | 2 | 2 | 1 | 2 | 6691.0222 | 0.00307  |
| 3 | 2 | 2 | 3 | 2 | 2 | 1 | 2 | 6691.0222 | 0.00338  |
| 3 | 2 | 2 | 3 | 2 | 2 | 1 | 3 | 6692.3853 | 0.00352  |
| 3 | 2 | 2 | 4 | 2 | 2 | 1 | 3 | 6692.3853 | 0.00367  |
| 3 | 2 | 2 | 2 | 2 | 2 | 1 | 1 | 6693.1453 | 0.00609  |
| 3 | 2 | 1 | 3 | 2 | 2 | 0 | 2 | 6777.8376 | -0.00288 |
| 3 | 2 | 1 | 4 | 2 | 2 | 0 | 3 | 6779.2161 | 0.00101  |
| 3 | 2 | 1 | 2 | 2 | 2 | 0 | 1 | 6779.9742 | -0.00104 |
| 3 | 1 | 2 | 3 | 2 | 1 | 1 | 3 | 7071.9252 | -0.00807 |
| 3 | 1 | 2 | 3 | 2 | 1 | 1 | 2 | 7072.6177 | -0.00937 |
| 3 | 1 | 2 | 2 | 2 | 1 | 1 | 1 | 7072.9956 | 0.00327  |
| 3 | 1 | 2 | 4 | 2 | 1 | 1 | 3 | 7072.9956 | -0.00794 |
| 3 | 1 | 2 | 2 | 2 | 1 | 1 | 2 | 7074.0677 | -0.0046  |
| 4 | 1 | 4 | 4 | 3 | 1 | 3 | 3 | 8355.1343 | 0.00526  |
| 4 | 1 | 4 | 3 | 3 | 1 | 3 | 2 | 8355.2914 | 0.05201  |
| 4 | 1 | 4 | 5 | 3 | 1 | 3 | 4 | 8355.2914 | -0.00272 |
| 4 | 0 | 4 | 3 | 3 | 0 | 3 | 2 | 8711.7213 | -0.00343 |
| 4 | 0 | 4 | 4 | 3 | 0 | 3 | 3 | 8711.8487 | 0.01677  |

|    |   |    |    |   |   |   |    |            |          |
|----|---|----|----|---|---|---|----|------------|----------|
| 4  | 0 | 4  | 5  | 3 | 0 | 3 | 4  | 8711.8487  | -0.00107 |
| 4  | 2 | 2  | 4  | 3 | 2 | 1 | 3  | 9116.1303  | 0.00309  |
| 4  | 2 | 2  | 5  | 3 | 2 | 1 | 4  | 9116.7214  | 0.00354  |
| 4  | 2 | 2  | 3  | 3 | 2 | 1 | 2  | 9116.8582  | -0.00963 |
| 8  | 1 | 7  | 8  | 7 | 1 | 6 | 7  | 18323.4241 | 0.00461  |
| 8  | 1 | 7  | 7  | 7 | 1 | 6 | 6  | 18323.4241 | 0.01511  |
| 8  | 1 | 7  | 9  | 7 | 1 | 6 | 8  | 18323.4241 | -0.0087  |
| 9  | 1 | 9  | 8  | 8 | 1 | 8 | 7  | 18469.9323 | 0.04328  |
| 9  | 1 | 9  | 10 | 8 | 1 | 8 | 9  | 18469.9323 | 0.02522  |
| 9  | 1 | 9  | 9  | 8 | 1 | 8 | 8  | 18469.9323 | 0.04236  |
| 9  | 0 | 9  | 9  | 8 | 0 | 8 | 8  | 18578.8501 | 0.01779  |
| 9  | 0 | 9  | 10 | 8 | 0 | 8 | 9  | 18578.8501 | 0.01135  |
| 9  | 0 | 9  | 8  | 8 | 0 | 8 | 7  | 18578.8501 | 0.03094  |
| 8  | 2 | 6  | 9  | 7 | 2 | 5 | 8  | 18775.2582 | -0.00954 |
| 8  | 2 | 6  | 7  | 7 | 2 | 5 | 6  | 18775.2582 | 0.00324  |
| 8  | 2 | 6  | 8  | 7 | 2 | 5 | 7  | 18775.2582 | 0.06798  |
| 9  | 2 | 8  | 8  | 8 | 2 | 7 | 7  | 19695.4902 | -0.00404 |
| 9  | 2 | 8  | 10 | 8 | 2 | 7 | 9  | 19695.4902 | -0.01581 |
| 9  | 2 | 8  | 9  | 8 | 2 | 7 | 8  | 19695.4902 | 0.03577  |
| 9  | 1 | 8  | 8  | 8 | 1 | 7 | 7  | 20398.8166 | 0.02071  |
| 9  | 1 | 8  | 9  | 8 | 1 | 7 | 8  | 20398.8166 | 0.0061   |
| 9  | 1 | 8  | 10 | 8 | 1 | 7 | 9  | 20398.8166 | 0.00128  |
| 10 | 1 | 10 | 9  | 9 | 1 | 9 | 8  | 20455.5426 | -0.0223  |
| 10 | 1 | 10 | 11 | 9 | 1 | 9 | 10 | 20455.5426 | -0.03711 |



|    |   |    |    |    |   |    |    |            |          |
|----|---|----|----|----|---|----|----|------------|----------|
| 10 | 1 | 10 | 10 | 9  | 1 | 9  | 9  | 20455.5426 | -0.0241  |
| 10 | 0 | 10 | 11 | 9  | 0 | 9  | 10 | 20525.5652 | -0.01181 |
| 10 | 0 | 10 | 10 | 9  | 0 | 9  | 9  | 20525.5652 | -0.00492 |
| 10 | 0 | 10 | 9  | 9  | 0 | 9  | 8  | 20525.5652 | 0.00376  |
| 9  | 2 | 7  | 8  | 8  | 2 | 6  | 7  | 21155.2287 | -0.02998 |
| 9  | 2 | 7  | 9  | 8  | 2 | 6  | 8  | 21155.2287 | 0.00804  |
| 9  | 2 | 7  | 10 | 8  | 2 | 6  | 9  | 21155.2287 | -0.04283 |
| 10 | 2 | 9  | 11 | 9  | 2 | 8  | 10 | 21782.9034 | -0.03778 |
| 10 | 2 | 9  | 10 | 9  | 2 | 8  | 9  | 21782.9034 | -0.00093 |
| 10 | 2 | 9  | 9  | 9  | 2 | 8  | 8  | 21782.9034 | -0.02693 |
| 11 | 1 | 11 | 12 | 10 | 1 | 10 | 11 | 22434.6724 | -0.03246 |
| 11 | 1 | 11 | 11 | 10 | 1 | 10 | 10 | 22434.6724 | -0.02219 |
| 12 | 0 | 12 | 13 | 11 | 0 | 11 | 12 | 24435.738  | -0.00826 |
| 12 | 0 | 12 | 12 | 11 | 0 | 11 | 11 | 24435.738  | -0.00175 |
| 12 | 0 | 12 | 11 | 11 | 0 | 11 | 10 | 24435.738  | 0.00234  |

---

**S5.4 Measured frequencies and residuals (in MHz) for the rotational transitions of  $^{13}\text{C}_4$  CHT-1-CN-1 in the low-frequency region (2-26 GHz) fit using SPFIT/SPCAT suite of programs from Pickett.**

| $J$ | $K_a$ | $K_c$ | $F$ | $J'$ | $K'_a$ | $K'_c$ | $F'$ | Observed Freq. (MHz) | Residuals (MHz) |
|-----|-------|-------|-----|------|--------|--------|------|----------------------|-----------------|
| 2   | 1     | 2     | 2   | 1    | 1      | 1      | 1    | 4179.5271            | 0.00073         |
| 2   | 1     | 2     | 2   | 1    | 1      | 1      | 2    | 4180.179             | 0.00509         |
| 2   | 1     | 2     | 1   | 1    | 1      | 1      | 1    | 4180.5767            | 0.00871         |
| 2   | 1     | 2     | 3   | 1    | 1      | 1      | 2    | 4180.8628            | 0.01996         |
| 2   | 0     | 2     | 2   | 1    | 0      | 1      | 2    | 4415.0795            | 0.00965         |
| 2   | 0     | 2     | 1   | 1    | 0      | 1      | 0    | 4415.2697            | -0.00141        |
| 2   | 0     | 2     | 2   | 1    | 0      | 1      | 1    | 4416.3427            | 0.0007          |
| 2   | 0     | 2     | 3   | 1    | 0      | 1      | 2    | 4416.4245            | -0.00142        |
| 2   | 0     | 2     | 1   | 1    | 0      | 1      | 1    | 4418.4536            | 0.00167         |
| 2   | 1     | 1     | 2   | 1    | 1      | 0      | 1    | 4691.6841            | -0.00168        |
| 2   | 1     | 1     | 2   | 1    | 1      | 0      | 2    | 4692.3105            | 0.00056         |
| 2   | 1     | 1     | 1   | 1    | 1      | 0      | 1    | 4692.7631            | -0.00276        |
| 2   | 1     | 1     | 3   | 1    | 1      | 0      | 2    | 4693.007             | 0.00317         |
| 2   | 1     | 1     | 1   | 1    | 1      | 0      | 0    | 4694.3268            | 0.00012         |
| 3   | 1     | 3     | 3   | 2    | 1      | 2      | 3    | 6257.7072            | 0.00152         |
| 3   | 1     | 3     | 3   | 2    | 1      | 2      | 2    | 6258.3772            | 0.00256         |
| 3   | 1     | 3     | 2   | 2    | 1      | 2      | 1    | 6258.7514            | 0.00693         |
| 3   | 1     | 3     | 4   | 2    | 1      | 2      | 3    | 6258.7514            | 0.00063         |

|   |   |   |   |   |   |   |   |           |          |
|---|---|---|---|---|---|---|---|-----------|----------|
| 3 | 1 | 3 | 2 | 2 | 1 | 2 | 2 | 6259.7854 | -0.00063 |
| 3 | 0 | 3 | 3 | 2 | 0 | 2 | 3 | 6573.1676 | 0.00083  |
| 3 | 0 | 3 | 2 | 2 | 0 | 2 | 1 | 6574.2974 | -0.00004 |
| 3 | 0 | 3 | 4 | 2 | 0 | 2 | 3 | 6574.5536 | -0.00893 |
| 3 | 0 | 3 | 3 | 2 | 0 | 2 | 2 | 6574.5536 | 0.03082  |
| 3 | 0 | 3 | 2 | 2 | 0 | 2 | 2 | 6576.4101 | 0.00264  |
| 3 | 2 | 2 | 2 | 2 | 2 | 1 | 2 | 6653.9365 | 0.00435  |
| 3 | 2 | 2 | 2 | 2 | 2 | 1 | 3 | 6655.3004 | 0.00519  |
| 3 | 2 | 2 | 2 | 2 | 2 | 1 | 1 | 6656.0544 | 0.00206  |
| 3 | 2 | 1 | 3 | 2 | 2 | 0 | 2 | 6734.3995 | -0.00602 |
| 3 | 2 | 1 | 2 | 2 | 2 | 0 | 3 | 6735.7766 | -0.00941 |
| 3 | 2 | 1 | 2 | 2 | 2 | 0 | 1 | 6736.5303 | -0.00888 |
| 3 | 1 | 2 | 3 | 2 | 1 | 1 | 3 | 7024.9008 | -0.00586 |
| 3 | 1 | 2 | 3 | 2 | 1 | 1 | 2 | 7025.5984 | -0.00212 |
| 3 | 1 | 2 | 2 | 2 | 1 | 1 | 1 | 7025.9727 | 0.00662  |
| 3 | 1 | 2 | 4 | 2 | 1 | 1 | 3 | 7025.9727 | -0.00451 |
| 3 | 1 | 2 | 2 | 2 | 1 | 1 | 2 | 7027.0438 | -0.00235 |
| 4 | 1 | 4 | 4 | 3 | 1 | 3 | 3 | 8323.2668 | 0.00038  |
| 4 | 1 | 4 | 5 | 3 | 1 | 3 | 4 | 8323.4278 | -0.00397 |
| 4 | 1 | 4 | 3 | 3 | 1 | 3 | 2 | 8323.4278 | 0.05072  |
| 4 | 0 | 4 | 3 | 3 | 0 | 3 | 2 | 8677.208  | 0.00078  |
| 4 | 0 | 4 | 4 | 3 | 0 | 3 | 3 | 8677.3356 | 0.02239  |
| 4 | 0 | 4 | 5 | 3 | 0 | 3 | 4 | 8677.3356 | 0.00354  |
| 4 | 2 | 3 | 4 | 3 | 2 | 2 | 4 | 8857.0686 | 0.01111  |

|   |   |   |    |   |   |   |   |            |          |
|---|---|---|----|---|---|---|---|------------|----------|
| 4 | 2 | 3 | 5  | 3 | 2 | 2 | 4 | 8857.6433  | 0.00931  |
| 4 | 2 | 3 | 3  | 3 | 2 | 2 | 2 | 8857.7972  | 0.01509  |
| 4 | 2 | 2 | 4  | 3 | 2 | 1 | 3 | 9053.0149  | -0.00995 |
| 4 | 2 | 2 | 5  | 3 | 2 | 1 | 4 | 9053.6005  | -0.01422 |
| 4 | 1 | 3 | 3  | 3 | 1 | 2 | 2 | 9341.6878  | 0.04729  |
| 4 | 1 | 3 | 5  | 3 | 1 | 2 | 4 | 9341.6878  | -0.00987 |
| 8 | 1 | 7 | 7  | 7 | 1 | 6 | 6 | 18242.3917 | 0.03442  |
| 8 | 1 | 7 | 9  | 7 | 1 | 6 | 8 | 18242.3917 | 0.01068  |
| 8 | 1 | 7 | 8  | 7 | 1 | 6 | 7 | 18242.3917 | 0.02525  |
| 9 | 1 | 9 | 8  | 8 | 1 | 8 | 7 | 18415.813  | 0.01364  |
| 9 | 1 | 9 | 10 | 8 | 1 | 8 | 9 | 18415.813  | -0.00443 |
| 9 | 1 | 9 | 9  | 8 | 1 | 8 | 8 | 18415.813  | 0.01279  |
| 9 | 0 | 9 | 9  | 8 | 0 | 8 | 8 | 18534.6185 | 0.01688  |
| 9 | 0 | 9 | 8  | 8 | 0 | 8 | 7 | 18534.6185 | 0.03057  |
| 9 | 0 | 9 | 10 | 8 | 0 | 8 | 9 | 18534.6185 | 0.01088  |
| 8 | 2 | 6 | 8  | 7 | 2 | 5 | 7 | 18638.2304 | 0.08833  |
| 8 | 2 | 6 | 9  | 7 | 2 | 5 | 8 | 18638.2304 | 0.00981  |
| 8 | 2 | 6 | 7  | 7 | 2 | 5 | 6 | 18638.2304 | 0.02242  |
| 9 | 2 | 8 | 9  | 8 | 2 | 7 | 8 | 19611.2328 | 0.02285  |
| 9 | 2 | 8 | 8  | 8 | 2 | 7 | 7 | 19611.2328 | -0.01739 |
| 9 | 2 | 8 | 10 | 8 | 2 | 7 | 9 | 19611.2328 | -0.02914 |
| 9 | 1 | 8 | 10 | 8 | 1 | 7 | 9 | 20323.8134 | 0.00774  |
| 9 | 1 | 8 | 8  | 8 | 1 | 7 | 7 | 20323.8134 | 0.02712  |
| 9 | 1 | 8 | 9  | 8 | 1 | 7 | 8 | 20323.8134 | 0.01372  |

|    |   |    |    |    |   |    |    |            |          |
|----|---|----|----|----|---|----|----|------------|----------|
| 10 | 1 | 10 | 9  | 9  | 1 | 9  | 8  | 20397.7269 | 0.01247  |
| 10 | 1 | 10 | 10 | 9  | 1 | 9  | 9  | 20397.7269 | 0.0107   |
| 10 | 1 | 10 | 11 | 9  | 1 | 9  | 10 | 20397.7269 | -0.00234 |
| 10 | 0 | 10 | 10 | 9  | 0 | 9  | 9  | 20475.5201 | -0.0397  |
| 10 | 0 | 10 | 9  | 9  | 0 | 9  | 8  | 20475.5201 | -0.03055 |
| 10 | 0 | 10 | 11 | 9  | 0 | 9  | 10 | 20475.5201 | -0.0462  |
| 9  | 2 | 7  | 9  | 8  | 2 | 6  | 8  | 21009.8335 | 0.01903  |
| 9  | 2 | 7  | 8  | 8  | 2 | 6  | 7  | 21009.8335 | -0.02037 |
| 9  | 2 | 7  | 10 | 8  | 2 | 6  | 9  | 21009.8335 | -0.03307 |
| 10 | 2 | 9  | 10 | 9  | 2 | 8  | 9  | 21695.651  | 0.00927  |
| 10 | 2 | 9  | 9  | 9  | 2 | 8  | 8  | 21695.651  | -0.01713 |
| 10 | 2 | 9  | 11 | 9  | 2 | 8  | 10 | 21695.651  | -0.02797 |
| 10 | 1 | 9  | 9  | 9  | 1 | 8  | 8  | 22338.5653 | -0.00275 |
| 10 | 1 | 9  | 11 | 9  | 1 | 8  | 10 | 22338.5653 | -0.01869 |
| 10 | 1 | 9  | 10 | 9  | 1 | 8  | 9  | 22338.5653 | -0.01774 |
| 11 | 1 | 11 | 10 | 10 | 1 | 10 | 9  | 22372.8477 | -0.04136 |
| 11 | 1 | 11 | 12 | 10 | 1 | 10 | 11 | 22372.8477 | -0.0537  |
| 11 | 1 | 11 | 11 | 10 | 1 | 10 | 10 | 22372.8477 | -0.04343 |
| 11 | 0 | 11 | 11 | 10 | 0 | 10 | 10 | 22422.2784 | 0.05102  |
| 11 | 0 | 11 | 10 | 10 | 0 | 10 | 9  | 22422.2784 | 0.05724  |
| 11 | 0 | 11 | 12 | 10 | 0 | 10 | 11 | 22422.2784 | 0.04448  |
| 10 | 2 | 8  | 10 | 9  | 2 | 7  | 9  | 23336.3892 | -0.01208 |
| 10 | 2 | 8  | 9  | 9  | 2 | 7  | 8  | 23336.3892 | -0.03437 |
| 10 | 2 | 8  | 11 | 9  | 2 | 7  | 10 | 23336.3892 | -0.04629 |

|    |   |    |    |    |   |   |    |            |          |
|----|---|----|----|----|---|---|----|------------|----------|
| 11 | 2 | 10 | 11 | 10 | 2 | 9 | 10 | 23756.9559 | 0.00843  |
| 11 | 2 | 10 | 10 | 10 | 2 | 9 | 9  | 23756.9559 | -0.00915 |
| 11 | 2 | 10 | 12 | 10 | 2 | 9 | 11 | 23756.9559 | 0.00843  |

---

**S5.5 Measured frequencies and residuals (in MHz) for the rotational transitions of  $^{13}\text{C8 CHT-1-CN-1}$  in the low-frequency region (2-26 GHz) fit using SPFIT/SPCAT suite of programs from Pickett.**

| $J$ | $K_a$ | $K_c$ | $F$ | $J'$ | $K'_a$ | $K'_c$ | $F'$ | Observed Freq. (MHz) | Residuals (MHz) |
|-----|-------|-------|-----|------|--------|--------|------|----------------------|-----------------|
| 2   | 1     | 2     | 2   | 1    | 1      | 1      | 1    | 4179.8228            | 0.00261         |
| 2   | 1     | 2     | 1   | 1    | 1      | 1      | 1    | 4180.8635            | 0.00342         |
| 2   | 1     | 2     | 3   | 1    | 1      | 1      | 2    | 4181.1348            | 0.00019         |
| 2   | 1     | 2     | 1   | 1    | 1      | 1      | 0    | 4182.4697            | -0.00682        |
| 2   | 0     | 2     | 2   | 1    | 0      | 1      | 2    | 4414.7223            | -0.00501        |
| 2   | 0     | 2     | 1   | 1    | 0      | 1      | 0    | 4414.9244            | -0.004          |
| 2   | 0     | 2     | 2   | 1    | 0      | 1      | 1    | 4415.9999            | 0.00243         |
| 2   | 0     | 2     | 3   | 1    | 0      | 1      | 2    | 4416.0793            | -0.00209        |
| 2   | 1     | 1     | 2   | 1    | 1      | 0      | 1    | 4690.2022            | 0.00457         |
| 2   | 1     | 1     | 3   | 1    | 1      | 0      | 2    | 4691.5117            | -0.00188        |
| 2   | 1     | 1     | 1   | 1    | 1      | 0      | 0    | 4692.8176            | -0.01679        |
| 3   | 1     | 3     | 3   | 2    | 1      | 2      | 2    | 6258.9624            | -0.00009        |
| 3   | 1     | 3     | 4   | 2    | 1      | 2      | 3    | 6259.3363            | -0.00171        |
| 3   | 1     | 3     | 2   | 2    | 1      | 2      | 1    | 6259.3363            | 0.00456         |
| 3   | 0     | 3     | 3   | 2    | 0      | 2      | 3    | 6573.2574            | -0.00535        |
| 3   | 0     | 3     | 2   | 2    | 0      | 2      | 1    | 6574.3861            | -0.00593        |
| 3   | 0     | 3     | 3   | 2    | 0      | 2      | 2    | 6574.6385            | 0.02175         |
| 3   | 0     | 3     | 4   | 2    | 0      | 2      | 3    | 6574.6385            | -0.01811        |

|   |   |   |   |   |   |   |   |            |          |
|---|---|---|---|---|---|---|---|------------|----------|
| 3 | 0 | 3 | 2 | 2 | 0 | 2 | 2 | 6576.4951  | -0.00373 |
| 3 | 2 | 2 | 3 | 2 | 2 | 1 | 2 | 6653.0379  | 0.00276  |
| 3 | 2 | 2 | 4 | 2 | 2 | 1 | 3 | 6654.3982  | 0.00225  |
| 3 | 2 | 2 | 2 | 2 | 2 | 1 | 1 | 6655.1681  | 0.01572  |
| 3 | 2 | 1 | 3 | 2 | 2 | 0 | 2 | 6732.5111  | -0.0056  |
| 3 | 2 | 1 | 4 | 2 | 2 | 0 | 3 | 6733.8912  | 0.00309  |
| 3 | 2 | 1 | 2 | 2 | 2 | 0 | 1 | 6734.6387  | -0.00812 |
| 3 | 1 | 2 | 3 | 2 | 1 | 1 | 3 | 7022.824   | -0.0204  |
| 3 | 1 | 2 | 3 | 2 | 1 | 1 | 2 | 7023.5243  | -0.01295 |
| 3 | 1 | 2 | 4 | 2 | 1 | 1 | 3 | 7023.9032  | -0.01018 |
| 3 | 1 | 2 | 2 | 2 | 1 | 1 | 1 | 7023.9032  | 0.00092  |
| 3 | 1 | 2 | 2 | 2 | 1 | 1 | 2 | 7024.978   | -0.00273 |
| 4 | 1 | 4 | 4 | 3 | 1 | 3 | 3 | 8324.2869  | -0.01249 |
| 4 | 1 | 4 | 3 | 3 | 1 | 3 | 2 | 8324.4616  | 0.05159  |
| 4 | 1 | 4 | 5 | 3 | 1 | 3 | 4 | 8324.4616  | -0.003   |
| 4 | 0 | 4 | 3 | 3 | 0 | 3 | 2 | 8678.3301  | -0.01016 |
| 4 | 0 | 4 | 4 | 3 | 0 | 3 | 3 | 8678.4584  | 0.01241  |
| 4 | 0 | 4 | 5 | 3 | 0 | 3 | 4 | 8678.4584  | -0.0066  |
| 4 | 2 | 3 | 4 | 3 | 2 | 2 | 3 | 8856.0642  | 0.00528  |
| 4 | 2 | 3 | 5 | 3 | 2 | 2 | 4 | 8856.6385  | 0.00387  |
| 4 | 2 | 3 | 3 | 3 | 2 | 2 | 2 | 8856.7871  | 0.00452  |
| 4 | 1 | 3 | 4 | 3 | 1 | 2 | 3 | 9339.1263  | -0.00557 |
| 4 | 1 | 3 | 5 | 3 | 1 | 2 | 4 | 9339.28    | -0.01643 |
| 8 | 1 | 7 | 7 | 7 | 1 | 6 | 6 | 18243.8831 | 0.01738  |



|    |   |    |    |    |   |   |    |            |          |
|----|---|----|----|----|---|---|----|------------|----------|
| 8  | 1 | 7  | 8  | 7  | 1 | 6 | 7  | 18243.8831 | 0.00846  |
| 8  | 1 | 7  | 9  | 7  | 1 | 6 | 8  | 18243.8831 | -0.0063  |
| 9  | 1 | 9  | 8  | 8  | 1 | 8 | 7  | 18420.7843 | 0.00219  |
| 9  | 1 | 9  | 10 | 8  | 1 | 8 | 9  | 18420.7843 | -0.01585 |
| 9  | 1 | 9  | 9  | 8  | 1 | 8 | 8  | 18420.7843 | 0.00136  |
| 9  | 0 | 9  | 10 | 8  | 0 | 8 | 9  | 18541.697  | 0.00513  |
| 9  | 0 | 9  | 9  | 8  | 0 | 8 | 8  | 18541.697  | 0.01104  |
| 9  | 0 | 9  | 8  | 8  | 0 | 8 | 7  | 18541.697  | 0.02481  |
| 8  | 2 | 6  | 8  | 7  | 2 | 5 | 7  | 18630.3016 | 0.08738  |
| 8  | 2 | 6  | 9  | 7  | 2 | 5 | 8  | 18630.3016 | 0.00881  |
| 8  | 2 | 6  | 7  | 7  | 2 | 5 | 6  | 18630.3016 | 0.02138  |
| 9  | 1 | 8  | 9  | 8  | 1 | 7 | 8  | 20328.0887 | 0.01344  |
| 9  | 1 | 8  | 10 | 8  | 1 | 7 | 9  | 20328.0887 | 0.00726  |
| 9  | 1 | 8  | 8  | 8  | 1 | 7 | 7  | 20328.0887 | 0.02659  |
| 9  | 2 | 7  | 10 | 8  | 2 | 6 | 9  | 21002.514  | -0.03375 |
| 9  | 2 | 7  | 9  | 8  | 2 | 6 | 8  | 21002.514  | 0.01848  |
| 9  | 2 | 7  | 8  | 8  | 2 | 6 | 7  | 21002.514  | -0.0211  |
| 11 | 2 | 10 | 12 | 10 | 2 | 9 | 11 | 23760.9107 | -0.0305  |
| 11 | 2 | 10 | 11 | 10 | 2 | 9 | 10 | 23760.9107 | -0.0032  |
| 11 | 2 | 10 | 10 | 10 | 2 | 9 | 9  | 23760.9107 | -0.0208  |
| 9  | 2 | 8  | 10 | 8  | 2 | 7 | 9  | 19611.2328 | -0.02914 |
| 9  | 1 | 8  | 10 | 8  | 1 | 7 | 9  | 20323.8134 | 0.00774  |
| 9  | 1 | 8  | 8  | 8  | 1 | 7 | 7  | 20323.8134 | 0.02712  |
| 9  | 1 | 8  | 9  | 8  | 1 | 7 | 8  | 20323.8134 | 0.01372  |

|    |   |    |    |    |   |    |    |            |          |
|----|---|----|----|----|---|----|----|------------|----------|
| 10 | 1 | 10 | 9  | 9  | 1 | 9  | 8  | 20397.7269 | 0.01247  |
| 10 | 1 | 10 | 10 | 9  | 1 | 9  | 9  | 20397.7269 | 0.0107   |
| 10 | 1 | 10 | 11 | 9  | 1 | 9  | 10 | 20397.7269 | -0.00234 |
| 10 | 0 | 10 | 10 | 9  | 0 | 9  | 9  | 20475.5201 | -0.0397  |
| 10 | 0 | 10 | 9  | 9  | 0 | 9  | 8  | 20475.5201 | -0.03055 |
| 10 | 0 | 10 | 11 | 9  | 0 | 9  | 10 | 20475.5201 | -0.0462  |
| 9  | 2 | 7  | 9  | 8  | 2 | 6  | 8  | 21009.8335 | 0.01903  |
| 9  | 2 | 7  | 8  | 8  | 2 | 6  | 7  | 21009.8335 | -0.02037 |
| 9  | 2 | 7  | 10 | 8  | 2 | 6  | 9  | 21009.8335 | -0.03307 |
| 10 | 2 | 9  | 10 | 9  | 2 | 8  | 9  | 21695.651  | 0.00927  |
| 10 | 2 | 9  | 9  | 9  | 2 | 8  | 8  | 21695.651  | -0.01713 |
| 10 | 2 | 9  | 11 | 9  | 2 | 8  | 10 | 21695.651  | -0.02797 |
| 10 | 1 | 9  | 9  | 9  | 1 | 8  | 8  | 22338.5653 | -0.00275 |
| 10 | 1 | 9  | 11 | 9  | 1 | 8  | 10 | 22338.5653 | -0.01869 |
| 10 | 1 | 9  | 10 | 9  | 1 | 8  | 9  | 22338.5653 | -0.01774 |
| 11 | 1 | 11 | 10 | 10 | 1 | 10 | 9  | 22372.8477 | -0.04136 |
| 11 | 1 | 11 | 12 | 10 | 1 | 10 | 11 | 22372.8477 | -0.0537  |
| 11 | 1 | 11 | 11 | 10 | 1 | 10 | 10 | 22372.8477 | -0.04343 |
| 11 | 0 | 11 | 11 | 10 | 0 | 10 | 10 | 22422.2784 | 0.05102  |
| 11 | 0 | 11 | 10 | 10 | 0 | 10 | 9  | 22422.2784 | 0.05724  |
| 11 | 0 | 11 | 12 | 10 | 0 | 10 | 11 | 22422.2784 | 0.04448  |
| 10 | 2 | 8  | 10 | 9  | 2 | 7  | 9  | 23336.3892 | -0.01208 |
| 10 | 2 | 8  | 9  | 9  | 2 | 7  | 8  | 23336.3892 | -0.03437 |
| 10 | 2 | 8  | 11 | 9  | 2 | 7  | 10 | 23336.3892 | -0.04629 |

|    |   |    |    |    |   |   |    |            |          |
|----|---|----|----|----|---|---|----|------------|----------|
| 11 | 2 | 10 | 11 | 10 | 2 | 9 | 10 | 23756.9559 | 0.00843  |
| 11 | 2 | 10 | 10 | 10 | 2 | 9 | 9  | 23756.9559 | -0.00915 |
| 11 | 2 | 10 | 12 | 10 | 2 | 9 | 11 | 23756.9559 | 0.00843  |

---

**S5.6 Measured frequencies and residuals (in MHz) for the rotational transitions of  $^{15}\text{N}_7$  CHT-1-CN-1 in the low-frequency region (2-26 GHz) fit using SPFIT/SPCAT suite of programs from Pickett.**

| $J$ | $K_a$ | $K_c$ | $J'$ | $K'_a$ | $K'_c$ | Observed Freq. (MHz) | Residuals (MHz) |
|-----|-------|-------|------|--------|--------|----------------------|-----------------|
| 2   | 0     | 2     | 1    | 0      | 1      | 4355.9586            | -0.0009         |
| 2   | 1     | 1     | 1    | 1      | 0      | 4623.1644            | -0.0012         |
| 3   | 1     | 3     | 2    | 1      | 2      | 6178.4109            | 0.0047          |
| 3   | 0     | 3     | 2    | 0      | 2      | 6487.4315            | 0.0035          |
| 3   | 2     | 2     | 2    | 2      | 1      | 6562.2766            | 0.0108          |
| 3   | 2     | 1     | 2    | 2      | 0      | 6637.1122            | 0.0036          |
| 3   | 1     | 2     | 2    | 1      | 1      | 6922.4565            | 0.001           |
| 4   | 0     | 4     | 3    | 0      | 3      | 8567.032             | -0.0004         |
| 8   | 1     | 7     | 7    | 1      | 6      | 18005.2693           | 0.0079          |
| 9   | 0     | 9     | 8    | 0      | 8      | 18321.967            | 0.0218          |
| 8   | 2     | 6     | 7    | 2      | 5      | 18352.4103           | -0.0015         |
| 9   | 1     | 8     | 8    | 1      | 7      | 20071.631            | -0.0129         |
| 10  | 1     | 10    | 9    | 1      | 9      | 20154.7048           | -0.0196         |

**S6.0 The experimental and theoretical rotational constants for  
the observed six low-lying vibrationally excited states of  
CHT-1-CN-1.**

The experimental and theoretical rotational constants for the observed six low-lying vibrationally excited states of CHT-1-CN-1. The rotational constants  $A_{theory}$ ,  $B_{theory}$ , and  $C_{theory}$  were corrected by 23.37 MHz, -4.14 MHz, and -3.85 MHz, respectively, to account for the differences in the experimental and theoretical rotational constants of the vibronic ground state.  $E_{fi}$  and  $E_a$  are the harmonic and anharmonic energies of the vibrational states.

| <b>Vibrationally excited states of CHT-1-CN-1</b> |                |                |               |                       |               |                 |  |  |  |
|---------------------------------------------------|----------------|----------------|---------------|-----------------------|---------------|-----------------|--|--|--|
| <b>Rotational parameters</b>                      | $\nu_{42}$     | $\nu_{41}$     | $2\nu_{42}$   | $\nu_{42} + \nu_{41}$ | $\nu_{40}$    | $\nu_{38}$      |  |  |  |
| $E_{fi} / \text{cm}^{-1}$                         | 110.2          | 149.4          | 220.4         | 259.9                 | 271.3         | 320.4           |  |  |  |
| $E_a / \text{cm}^{-1}$                            | 110.4          | 145.8          | 219.9         | 255.4                 | 269.8         | 318.3           |  |  |  |
| <b>Boltzmann population (%)</b>                   | 18.25          | 15.41          | 10.77         | 9.08                  | 8.47          | 6.84            |  |  |  |
| $A_{theory}^a / \text{MHz}$                       | 3513.36        | 3565.02        | 3488.57       | 3540.26               | 3543.4        | 3537.92         |  |  |  |
| $B_{theory} / \text{MHz}$                         | 1251.37        | 1253.11        | 1251.34       | 1253.08               | 1251.25       | 1251.97         |  |  |  |
| $C_{theory} / \text{MHz}$                         | 990.65         | 991.04         | 990.68        | 991.07                | 990.14        | 990.26          |  |  |  |
| $A / \text{MHz}$                                  | 3511.3491(46)  | 3565.8196(44)  | 3490.087(64)  | 3540.123(25)          | 3542.25(51)   | 3475.10(99)     |  |  |  |
| $B / \text{MHz}$                                  | 1251.32759(32) | 1253.25308(43) | 1250.9389(69) | 1251.7762(26)         | 1251.322(120) | 1250.171(105)   |  |  |  |
| $C / \text{MHz}$                                  | 990.57016(28)  | 991.31445(24)  | 990.50584(42) | 990.21198(40)         | 990.13710(38) | 990.416978(122) |  |  |  |
| $\Delta_J^b / \text{kHz}$                         | 0.055728(49)   | 0.056761(74)   | 0.056988(89)  | 0.055413(90)          | 0.054706(69)  | 0.057163(58)    |  |  |  |
| $\Delta_K / \text{kHz}$                           | 0.15257(23)    | 0.2491(11)     | 0.123(16)     | 0.384(18)             | 0.384(18)     | [ 0.20088039]   |  |  |  |
| $\Delta_K / \text{kHz}$                           | [ 0.83]        | [ 0.83]        | [ 0.83]       | [ 0.83]               | [ 0.83]       | [ 0.766306647]  |  |  |  |
| $\delta_J / \text{kHz}$                           | -0.006529(36)  | -0.007072(45)  | [-0.006736]   | [-0.006736]           | [-0.006736]   | [ 0.006736]     |  |  |  |
| $\delta_K / \text{kHz}$                           | -0.2151(13)    | -0.3439(14)    | -0.2002(84)   | -0.3828(94)           | -0.3828(94)   | [ 0.277093198]  |  |  |  |
| $\sigma^c / \text{kHz}$                           | 92             | 120            | 112           | 100                   | 150           | 76              |  |  |  |
| <b>No. of lines</b>                               | 714            | 361            | 123           | 107                   | 63            | 96              |  |  |  |
| $J/K_a^d$                                         | 54/31          | 54/13          | 54/6          | 54/6                  | 47/4          | 44/3            |  |  |  |

<sup>a</sup> A, B, and C are the rotational constants.

<sup>b</sup>  $\Delta_J$ ,  $\Delta_K$ ,  $\Delta_K$ ,  $\delta_J$ , and  $\delta_J$  are the quartic centrifugal distortion constants.

<sup>c</sup> Microwave root-mean-square deviation of the fit.

<sup>d</sup> Maximum values of  $J$  and  $K_a$  assigned in the fit.

**S7.0 The list of assigned transitions for the observed six low-lying vibrationally excited states of CHT-1-CN-1.**

**S7.1 Measured frequencies and residuals (in MHz) for the rotational transitions of the vibrationally excited state  $\nu_{42}$  of CHT-1-CN-1 in the frequency range of 75-110 GHz using SPFIT/SPCAT suite of programs from Pickett.**

| $J$ | $K_a$ | $K_c$ | $J'$ | $K'_a$ | $K'_c$ | Observed Freq. (MHz) | Residuals (MHz) |
|-----|-------|-------|------|--------|--------|----------------------|-----------------|
| 33  | 12    | 22    | 32   | 12     | 21     | 75005.8023           | 0.0647          |
| 33  | 12    | 21    | 32   | 12     | 20     | 75005.8023           | -0.0624         |
| 33  | 5     | 28    | 32   | 5      | 27     | 75047.4958           | -0.0816         |
| 35  | 4     | 32    | 34   | 4      | 31     | 75059.2475           | -0.004          |
| 35  | 3     | 32    | 34   | 3      | 31     | 75062.0183           | 0.033           |
| 33  | 11    | 23    | 32   | 11     | 22     | 75193.829            | -0.0175         |
| 33  | 11    | 22    | 32   | 11     | 21     | 75195.769            | -0.0789         |
| 36  | 2     | 34    | 35   | 2      | 33     | 75382.499            | -0.0462         |
| 36  | 3     | 34    | 35   | 3      | 33     | 75382.499            | 0.0257          |
| 33  | 10    | 24    | 32   | 10     | 23     | 75446.41             | 0.0128          |
| 37  | 1     | 36    | 36   | 1      | 35     | 75729.082            | 0.0495          |
| 32  | 7     | 25    | 31   | 7      | 24     | 75842.059            | -0.1133         |
| 33  | 8     | 26    | 32   | 8      | 25     | 75922.9843           | -0.145          |

|    |    |    |    |    |    |            |         |
|----|----|----|----|----|----|------------|---------|
| 33 | 9  | 24 | 32 | 9  | 23 | 75966.088  | -0.039  |
| 38 | 0  | 38 | 37 | 0  | 37 | 76085.064  | 0.0594  |
| 34 | 6  | 29 | 33 | 6  | 28 | 76416.9096 | -0.0117 |
| 34 | 29 | 5  | 33 | 29 | 4  | 76493.4739 | -0.0291 |
| 34 | 29 | 6  | 33 | 29 | 5  | 76493.4739 | -0.0291 |
| 34 | 27 | 8  | 33 | 27 | 7  | 76520.4971 | -0.0345 |
| 34 | 27 | 7  | 33 | 27 | 6  | 76520.4971 | -0.0345 |
| 34 | 26 | 9  | 33 | 26 | 8  | 76536.3423 | 0.0485  |
| 34 | 26 | 8  | 33 | 26 | 7  | 76536.3423 | 0.0485  |
| 34 | 23 | 11 | 33 | 23 | 10 | 76595.9868 | 0.0491  |
| 34 | 23 | 12 | 33 | 23 | 11 | 76595.9868 | 0.0491  |
| 34 | 22 | 12 | 33 | 22 | 11 | 76621.2582 | -0.0087 |
| 34 | 22 | 13 | 33 | 22 | 12 | 76621.2582 | -0.0087 |
| 34 | 20 | 15 | 33 | 20 | 14 | 76683.609  | -0.0056 |
| 34 | 20 | 14 | 33 | 20 | 13 | 76683.609  | -0.0056 |
| 34 | 19 | 16 | 33 | 19 | 15 | 76722.431  | 0.0437  |
| 34 | 19 | 15 | 33 | 19 | 14 | 76722.431  | 0.0437  |
| 35 | 5  | 31 | 34 | 5  | 30 | 76748.6586 | -0.012  |
| 34 | 18 | 16 | 33 | 18 | 15 | 76767.8475 | 0.0113  |
| 35 | 4  | 31 | 34 | 4  | 30 | 76786.9383 | -0.0223 |
| 34 | 17 | 17 | 33 | 17 | 16 | 76821.7436 | 0.0863  |
| 34 | 16 | 18 | 33 | 16 | 17 | 76886.2269 | 0.0876  |
| 34 | 5  | 29 | 33 | 5  | 28 | 76892.1396 | -0.0826 |
| 34 | 15 | 20 | 33 | 15 | 19 | 76964.448  | 0.0014  |



|    |    |    |    |    |    |            |         |
|----|----|----|----|----|----|------------|---------|
| 34 | 15 | 19 | 33 | 15 | 18 | 76964.448  | 0.0014  |
| 36 | 4  | 33 | 35 | 4  | 32 | 77036.2437 | 0.0362  |
| 36 | 3  | 33 | 35 | 3  | 32 | 77037.873  | 0.0142  |
| 34 | 14 | 20 | 33 | 14 | 19 | 77061.048  | -0.0372 |
| 34 | 14 | 21 | 33 | 14 | 20 | 77061.048  | -0.0365 |
| 33 | 8  | 25 | 32 | 8  | 24 | 77096.5286 | -0.0165 |
| 34 | 13 | 22 | 33 | 13 | 21 | 77182.6628 | -0.049  |
| 34 | 13 | 21 | 33 | 13 | 20 | 77182.6628 | -0.0629 |
| 37 | 2  | 35 | 36 | 2  | 34 | 77361.92   | -0.0059 |
| 34 | 11 | 24 | 33 | 11 | 23 | 77547.6235 | -0.0277 |
| 34 | 7  | 28 | 33 | 7  | 27 | 77696.728  | -0.0522 |
| 38 | 1  | 37 | 37 | 1  | 36 | 77709.277  | 0.0249  |
| 34 | 10 | 25 | 33 | 10 | 24 | 77824.276  | -0.0211 |
| 34 | 10 | 24 | 33 | 10 | 23 | 77865.7816 | -0.0431 |
| 39 | 0  | 39 | 38 | 0  | 38 | 78065.429  | 0.0583  |
| 34 | 9  | 26 | 33 | 9  | 25 | 78135.686  | 0.0057  |
| 34 | 8  | 27 | 33 | 8  | 26 | 78237.0973 | -0.0224 |
| 33 | 7  | 26 | 32 | 7  | 25 | 78377.6756 | -0.0225 |
| 35 | 6  | 30 | 34 | 6  | 29 | 78424.5286 | -0.0269 |
| 36 | 5  | 32 | 35 | 5  | 31 | 78723.6229 | -0.0219 |
| 36 | 4  | 32 | 35 | 4  | 31 | 78748.0731 | -0.0143 |
| 35 | 5  | 30 | 34 | 5  | 29 | 78760.7796 | -0.0144 |
| 35 | 27 | 8  | 34 | 27 | 7  | 78782.4612 | 0.0028  |
| 35 | 26 | 9  | 34 | 26 | 8  | 78799.6194 | 0.0026  |

|    |    |    |    |    |    |            |         |
|----|----|----|----|----|----|------------|---------|
| 35 | 25 | 10 | 34 | 25 | 9  | 78818.7565 | -0.023  |
| 35 | 23 | 12 | 34 | 23 | 11 | 78864.6127 | 0.0169  |
| 35 | 23 | 13 | 34 | 23 | 12 | 78864.6127 | 0.0169  |
| 35 | 22 | 13 | 34 | 22 | 12 | 78892.2809 | 0.0708  |
| 35 | 22 | 14 | 34 | 22 | 13 | 78892.2809 | 0.0708  |
| 35 | 21 | 14 | 34 | 21 | 13 | 78923.8424 | 0.0379  |
| 35 | 21 | 15 | 34 | 21 | 14 | 78923.8424 | 0.0379  |
| 35 | 19 | 16 | 34 | 19 | 15 | 79002.5532 | 0.0103  |
| 35 | 19 | 17 | 34 | 19 | 16 | 79002.5532 | 0.0103  |
| 37 | 4  | 34 | 36 | 4  | 33 | 79013.377  | -0.0011 |
| 37 | 3  | 34 | 36 | 3  | 33 | 79014.38   | 0.0105  |
| 35 | 18 | 18 | 34 | 18 | 17 | 79052.1442 | -0.0319 |
| 35 | 18 | 17 | 34 | 18 | 16 | 79052.1442 | -0.0319 |
| 35 | 17 | 19 | 34 | 17 | 18 | 79111.0139 | 0.0257  |
| 35 | 17 | 18 | 34 | 17 | 17 | 79111.0139 | 0.0257  |
| 35 | 16 | 19 | 34 | 16 | 18 | 79181.5162 | 0.0115  |
| 35 | 16 | 20 | 34 | 16 | 19 | 79181.5162 | 0.0115  |
| 35 | 15 | 20 | 34 | 15 | 19 | 79267.234  | 0.0047  |
| 35 | 15 | 21 | 34 | 15 | 20 | 79267.234  | 0.0047  |
| 38 | 2  | 36 | 37 | 2  | 35 | 79341.421  | 0.0429  |
| 35 | 14 | 21 | 34 | 14 | 20 | 79373.1538 | -0.0223 |
| 35 | 14 | 22 | 34 | 14 | 21 | 79373.1538 | -0.0209 |
| 34 | 6  | 28 | 33 | 6  | 27 | 79486.7795 | -0.0542 |
| 35 | 13 | 23 | 34 | 13 | 22 | 79506.818  | 0.0208  |

|    |    |    |    |    |    |            |         |
|----|----|----|----|----|----|------------|---------|
| 35 | 13 | 22 | 34 | 13 | 21 | 79506.818  | -0.0082 |
| 39 | 1  | 38 | 38 | 1  | 37 | 79689.494  | 0.0435  |
| 39 | 2  | 38 | 38 | 2  | 37 | 79689.494  | 0.0438  |
| 35 | 7  | 29 | 34 | 7  | 28 | 79820.2081 | -0.0094 |
| 35 | 11 | 25 | 34 | 11 | 24 | 79909.189  | 0.0222  |
| 35 | 11 | 24 | 34 | 11 | 23 | 79915.898  | 0.0355  |
| 40 | 0  | 40 | 39 | 0  | 39 | 80045.77   | 0.0716  |
| 35 | 10 | 26 | 34 | 10 | 25 | 80209.503  | -0.015  |
| 35 | 10 | 25 | 34 | 10 | 24 | 80278.78   | 0.0697  |
| 36 | 6  | 31 | 35 | 6  | 30 | 80419.811  | -0.0078 |
| 35 | 9  | 27 | 34 | 9  | 26 | 80516.802  | -0.0309 |
| 35 | 8  | 28 | 34 | 8  | 27 | 80524.71   | -0.018  |
| 36 | 5  | 31 | 35 | 5  | 30 | 80652.575  | 0.0323  |
| 37 | 5  | 33 | 36 | 5  | 32 | 80697.8167 | -0.0328 |
| 37 | 4  | 33 | 36 | 4  | 32 | 80713.304  | -0.0006 |
| 34 | 7  | 27 | 33 | 7  | 26 | 80815.4213 | -0.0877 |
| 38 | 3  | 35 | 37 | 3  | 34 | 80991.3087 | -0.0567 |
| 35 | 9  | 26 | 34 | 9  | 25 | 81017.1372 | -0.0277 |
| 36 | 28 | 8  | 35 | 28 | 7  | 81028.6496 | 0.0422  |
| 36 | 27 | 10 | 35 | 27 | 9  | 81045.4331 | 0.06    |
| 36 | 27 | 9  | 35 | 27 | 8  | 81045.4331 | 0.06    |
| 36 | 26 | 10 | 35 | 26 | 9  | 81064.0312 | 0.0212  |
| 36 | 26 | 11 | 35 | 26 | 10 | 81064.0312 | 0.0212  |
| 36 | 25 | 11 | 35 | 25 | 10 | 81084.7881 | -0.0435 |

|    |    |    |    |    |    |            |         |
|----|----|----|----|----|----|------------|---------|
| 36 | 25 | 12 | 35 | 25 | 11 | 81084.7881 | -0.0435 |
| 36 | 24 | 12 | 35 | 24 | 11 | 81108.2852 | 0.0658  |
| 36 | 24 | 13 | 35 | 24 | 12 | 81108.2852 | 0.0658  |
| 36 | 23 | 13 | 35 | 23 | 12 | 81134.6364 | -0.0052 |
| 36 | 23 | 14 | 35 | 23 | 13 | 81134.6364 | -0.0052 |
| 36 | 22 | 14 | 35 | 22 | 13 | 81164.7038 | 0.025   |
| 36 | 22 | 15 | 35 | 22 | 14 | 81164.7038 | 0.025   |
| 36 | 21 | 15 | 35 | 21 | 14 | 81199.1128 | 0.0548  |
| 36 | 21 | 16 | 35 | 21 | 15 | 81199.1128 | 0.0548  |
| 36 | 20 | 17 | 35 | 20 | 16 | 81238.753  | 0.0521  |
| 36 | 20 | 16 | 35 | 20 | 15 | 81238.753  | 0.0521  |
| 36 | 19 | 17 | 35 | 19 | 16 | 81284.8122 | 0.0209  |
| 36 | 19 | 18 | 35 | 19 | 17 | 81284.8122 | 0.0209  |
| 39 | 2  | 37 | 38 | 2  | 36 | 81320.917  | 0.0321  |
| 35 | 6  | 29 | 34 | 6  | 28 | 81330.6319 | -0.077  |
| 36 | 18 | 18 | 35 | 18 | 17 | 81338.9223 | 0.0484  |
| 36 | 17 | 20 | 35 | 17 | 19 | 81402.992  | -0.0077 |
| 36 | 17 | 19 | 35 | 17 | 18 | 81402.992  | -0.0077 |
| 36 | 16 | 20 | 35 | 16 | 19 | 81479.9024 | -0.0498 |
| 36 | 15 | 21 | 35 | 15 | 20 | 81573.6371 | 0.0302  |
| 36 | 15 | 22 | 35 | 15 | 21 | 81573.6371 | 0.0303  |
| 40 | 1  | 39 | 39 | 1  | 38 | 81669.647  | 0.0224  |
| 40 | 2  | 39 | 39 | 2  | 38 | 81669.647  | 0.0226  |
| 36 | 14 | 22 | 35 | 14 | 21 | 81689.5368 | -0.0041 |

|    |    |    |    |    |    |            |         |
|----|----|----|----|----|----|------------|---------|
| 36 | 14 | 23 | 35 | 14 | 22 | 81689.5368 | -0.0011 |
| 36 | 13 | 24 | 35 | 13 | 23 | 81836.117  | 0.024   |
| 36 | 13 | 23 | 35 | 13 | 22 | 81836.117  | -0.0353 |
| 36 | 7  | 30 | 35 | 7  | 29 | 81912.531  | -0.01   |
| 41 | 0  | 41 | 40 | 0  | 40 | 82026.052  | 0.0654  |
| 36 | 11 | 25 | 35 | 11 | 24 | 82290.495  | 0.014   |
| 37 | 6  | 32 | 36 | 6  | 31 | 82405.959  | -0.0161 |
| 37 | 5  | 32 | 36 | 5  | 31 | 82564.156  | 0.0103  |
| 36 | 10 | 27 | 35 | 10 | 26 | 82600.958  | -0.0205 |
| 38 | 5  | 34 | 37 | 5  | 33 | 82671.77   | -0.0213 |
| 38 | 4  | 34 | 37 | 4  | 33 | 82681.467  | -0.0132 |
| 36 | 10 | 26 | 35 | 10 | 25 | 82713.501  | -0.0636 |
| 36 | 8  | 29 | 35 | 8  | 28 | 82781.925  | -0.0127 |
| 36 | 6  | 30 | 35 | 6  | 29 | 83134.176  | -0.0286 |
| 35 | 7  | 28 | 34 | 7  | 27 | 83141.499  | -0.0484 |
| 37 | 31 | 7  | 36 | 31 | 6  | 83246.2887 | 0.0313  |
| 37 | 29 | 8  | 36 | 29 | 7  | 83274.7245 | -0.0027 |
| 40 | 2  | 38 | 39 | 2  | 37 | 83300.463  | 0.0303  |
| 37 | 27 | 11 | 36 | 27 | 10 | 83309.333  | 0.0283  |
| 37 | 27 | 10 | 36 | 27 | 9  | 83309.333  | 0.0283  |
| 37 | 24 | 13 | 36 | 24 | 12 | 83377.4702 | 0.0215  |
| 37 | 24 | 14 | 36 | 24 | 13 | 83377.4702 | 0.0215  |
| 37 | 23 | 14 | 36 | 23 | 13 | 83406.129  | 0.0115  |
| 37 | 23 | 15 | 36 | 23 | 14 | 83406.129  | 0.0115  |

|    |    |    |    |    |    |            |         |
|----|----|----|----|----|----|------------|---------|
| 37 | 22 | 15 | 36 | 22 | 14 | 83438.7647 | 0.0447  |
| 37 | 22 | 16 | 36 | 22 | 15 | 83438.7647 | 0.0447  |
| 37 | 21 | 17 | 36 | 21 | 16 | 83476.0567 | 0.0072  |
| 37 | 21 | 16 | 36 | 21 | 15 | 83476.0567 | 0.0072  |
| 37 | 20 | 17 | 36 | 20 | 16 | 83519.1514 | 0.0395  |
| 37 | 20 | 18 | 36 | 20 | 17 | 83519.1514 | 0.0395  |
| 37 | 19 | 18 | 36 | 19 | 17 | 83569.2213 | 0.0197  |
| 37 | 19 | 19 | 36 | 19 | 18 | 83569.2213 | 0.0197  |
| 36 | 9  | 27 | 35 | 9  | 26 | 83618.3697 | 0.0214  |
| 37 | 18 | 20 | 36 | 18 | 19 | 83628.0205 | 0.011   |
| 37 | 18 | 19 | 36 | 18 | 18 | 83628.0205 | 0.011   |
| 41 | 1  | 40 | 40 | 1  | 39 | 83649.8001 | 0.0284  |
| 41 | 2  | 40 | 40 | 2  | 39 | 83649.8001 | 0.0285  |
| 37 | 17 | 20 | 36 | 17 | 19 | 83697.841  | 0.054   |
| 37 | 16 | 21 | 36 | 16 | 20 | 83781.6075 | 0.0097  |
| 37 | 16 | 22 | 36 | 16 | 21 | 83781.6075 | 0.0098  |
| 37 | 15 | 22 | 36 | 15 | 21 | 83883.732  | 0.0061  |
| 42 | 1  | 42 | 41 | 1  | 41 | 84006.324  | 0.0899  |
| 42 | 0  | 42 | 41 | 0  | 41 | 84006.324  | 0.0899  |
| 37 | 14 | 23 | 36 | 14 | 22 | 84010.371  | -0.0033 |
| 37 | 13 | 24 | 36 | 13 | 23 | 84170.948  | -0.0374 |
| 37 | 12 | 26 | 36 | 12 | 25 | 84379.7823 | 0.086   |
| 37 | 12 | 25 | 36 | 12 | 24 | 84381.413  | -0.0332 |
| 38 | 6  | 33 | 37 | 6  | 32 | 84385.73   | -0.0089 |

|    |    |    |    |    |    |            |         |
|----|----|----|----|----|----|------------|---------|
| 38 | 5  | 33 | 37 | 5  | 32 | 84491.573  | -0.0223 |
| 39 | 5  | 35 | 38 | 5  | 34 | 84645.771  | -0.0148 |
| 39 | 4  | 35 | 38 | 4  | 34 | 84651.7677 | -0.0449 |
| 37 | 11 | 27 | 36 | 11 | 26 | 84656.259  | 0.0218  |
| 37 | 6  | 31 | 36 | 6  | 30 | 84926.667  | -0.0175 |
| 40 | 4  | 37 | 39 | 4  | 36 | 84946.273  | 0.0724  |
| 37 | 10 | 28 | 36 | 10 | 27 | 84996.935  | -0.0269 |
| 37 | 8  | 30 | 36 | 8  | 29 | 85005.847  | 0.0125  |
| 37 | 10 | 27 | 36 | 10 | 26 | 85175.886  | 0.055   |
| 36 | 8  | 28 | 35 | 8  | 27 | 85182.047  | -0.0339 |
| 37 | 9  | 29 | 36 | 9  | 28 | 85249.822  | 0.0553  |
| 41 | 2  | 39 | 40 | 2  | 38 | 85280.032  | 0.0217  |
| 41 | 3  | 39 | 40 | 3  | 38 | 85280.032  | 0.0261  |
| 36 | 7  | 29 | 35 | 7  | 28 | 85347.9759 | -0.0731 |
| 38 | 30 | 8  | 37 | 30 | 7  | 85520.7974 | -0.008  |
| 38 | 30 | 9  | 37 | 30 | 8  | 85520.7974 | -0.008  |
| 38 | 29 | 10 | 37 | 29 | 9  | 85536.8768 | -0.0225 |
| 38 | 29 | 9  | 37 | 29 | 8  | 85536.8768 | -0.0225 |
| 38 | 28 | 10 | 37 | 28 | 9  | 85554.5699 | -0.07   |
| 38 | 28 | 11 | 37 | 28 | 10 | 85554.5699 | -0.07   |
| 38 | 27 | 11 | 37 | 27 | 10 | 85574.2571 | -0.0255 |
| 38 | 27 | 12 | 37 | 27 | 11 | 85574.2571 | -0.0255 |
| 38 | 26 | 13 | 37 | 26 | 12 | 85596.1024 | -0.0311 |
| 38 | 26 | 12 | 37 | 26 | 11 | 85596.1024 | -0.0311 |

|    |    |    |    |    |    |            |         |
|----|----|----|----|----|----|------------|---------|
| 38 | 25 | 14 | 37 | 25 | 13 | 85620.5922 | 0.0291  |
| 38 | 25 | 13 | 37 | 25 | 12 | 85620.5922 | 0.0291  |
| 42 | 2  | 41 | 41 | 2  | 40 | 85629.926  | 0.0368  |
| 42 | 1  | 41 | 41 | 1  | 40 | 85629.926  | 0.0367  |
| 38 | 24 | 15 | 37 | 24 | 14 | 85647.97   | -0.0524 |
| 38 | 24 | 14 | 37 | 24 | 13 | 85647.97   | -0.0524 |
| 38 | 23 | 16 | 37 | 23 | 15 | 85679.1017 | 0.0359  |
| 38 | 23 | 15 | 37 | 23 | 14 | 85679.1017 | 0.0359  |
| 38 | 22 | 17 | 37 | 22 | 16 | 85714.3732 | -0.0082 |
| 38 | 22 | 16 | 37 | 22 | 15 | 85714.3732 | -0.0082 |
| 38 | 21 | 18 | 37 | 21 | 17 | 85754.8118 | -0.0207 |
| 38 | 21 | 17 | 37 | 21 | 16 | 85754.8118 | -0.0207 |
| 38 | 20 | 19 | 37 | 20 | 18 | 85801.5091 | -0.0066 |
| 38 | 20 | 18 | 37 | 20 | 17 | 85801.5091 | -0.0066 |
| 38 | 19 | 19 | 37 | 19 | 18 | 85855.8507 | 0.0071  |
| 38 | 19 | 20 | 37 | 19 | 19 | 85855.8507 | 0.0071  |
| 43 | 1  | 43 | 42 | 1  | 42 | 85986.514  | 0.0742  |
| 38 | 16 | 22 | 37 | 16 | 21 | 86086.5948 | 0.0321  |
| 38 | 16 | 23 | 37 | 16 | 22 | 86086.5948 | 0.0322  |
| 38 | 15 | 23 | 37 | 15 | 22 | 86197.724  | -0.017  |
| 38 | 14 | 24 | 37 | 14 | 23 | 86335.867  | -0.0174 |
| 39 | 6  | 34 | 38 | 6  | 33 | 86361.21   | -0.0467 |
| 39 | 5  | 34 | 38 | 5  | 33 | 86431.1288 | -0.0392 |
| 38 | 13 | 25 | 37 | 13 | 24 | 86511.5136 | -0.1235 |



|    |    |    |    |    |    |            |         |
|----|----|----|----|----|----|------------|---------|
| 38 | 13 | 26 | 37 | 13 | 25 | 86511.5136 | 0.1067  |
| 40 | 5  | 36 | 39 | 5  | 35 | 86620.001  | -0.0146 |
| 40 | 4  | 36 | 39 | 4  | 35 | 86623.741  | 0.0032  |
| 38 | 12 | 27 | 37 | 12 | 26 | 86740.342  | -0.0569 |
| 38 | 12 | 26 | 37 | 12 | 25 | 86743.586  | 0.0025  |
| 41 | 3  | 38 | 40 | 3  | 37 | 86924.253  | -0.0651 |
| 41 | 4  | 38 | 40 | 4  | 37 | 86924.253  | 0.0572  |
| 38 | 11 | 28 | 37 | 11 | 27 | 87041.9    | 0.0404  |
| 38 | 11 | 27 | 37 | 11 | 26 | 87076.44   | 0.0038  |
| 38 | 8  | 31 | 37 | 8  | 30 | 87194.822  | 0.0135  |
| 42 | 2  | 40 | 41 | 2  | 39 | 87259.5931 | -0.0149 |
| 42 | 3  | 40 | 41 | 3  | 39 | 87259.5931 | -0.0124 |
| 38 | 10 | 29 | 37 | 10 | 28 | 87394.997  | -0.0066 |
| 37 | 7  | 30 | 36 | 7  | 29 | 87433.684  | -0.0803 |
| 43 | 1  | 42 | 42 | 1  | 41 | 87610.008  | 0.0329  |
| 38 | 10 | 28 | 37 | 10 | 27 | 87672.2861 | -0.0069 |
| 39 | 31 | 9  | 38 | 31 | 8  | 87766.77   | -0.0609 |
| 39 | 31 | 8  | 38 | 31 | 7  | 87766.77   | -0.0609 |
| 39 | 29 | 11 | 38 | 29 | 10 | 87800.035  | 0.04    |
| 39 | 29 | 10 | 38 | 29 | 9  | 87800.035  | 0.04    |
| 37 | 8  | 29 | 36 | 8  | 28 | 87805.937  | 0.0059  |
| 39 | 28 | 11 | 38 | 28 | 10 | 87819.1475 | 0.0119  |
| 39 | 28 | 12 | 38 | 28 | 11 | 87819.1475 | 0.0119  |
| 39 | 27 | 12 | 38 | 27 | 11 | 87840.3578 | 0.0219  |

|    |    |    |    |    |    |            |         |
|----|----|----|----|----|----|------------|---------|
| 39 | 27 | 13 | 38 | 27 | 12 | 87840.3578 | 0.0219  |
| 39 | 25 | 14 | 38 | 25 | 13 | 87890.3063 | -0.0061 |
| 39 | 25 | 15 | 38 | 25 | 14 | 87890.3063 | -0.0061 |
| 39 | 24 | 15 | 38 | 24 | 14 | 87920.0673 | 0.0882  |
| 39 | 24 | 16 | 38 | 24 | 15 | 87920.0673 | 0.0882  |
| 39 | 23 | 17 | 38 | 23 | 16 | 87953.5279 | -0.0016 |
| 39 | 23 | 16 | 38 | 23 | 15 | 87953.5279 | -0.0016 |
| 44 | 1  | 44 | 43 | 1  | 43 | 87966.675  | 0.0725  |
| 39 | 22 | 17 | 38 | 22 | 16 | 87991.7298 | 0.0191  |
| 39 | 22 | 18 | 38 | 22 | 17 | 87991.7298 | 0.0191  |
| 39 | 21 | 18 | 38 | 21 | 17 | 88035.4555 | -0.0057 |
| 39 | 21 | 19 | 38 | 21 | 18 | 88035.4555 | -0.0057 |
| 39 | 7  | 33 | 38 | 7  | 32 | 88036.4807 | 0.0287  |
| 39 | 20 | 19 | 38 | 20 | 18 | 88086.0072 | 0.033   |
| 39 | 20 | 20 | 38 | 20 | 19 | 88086.0072 | 0.033   |
| 39 | 19 | 20 | 38 | 19 | 19 | 88144.7813 | -0.0078 |
| 39 | 19 | 21 | 38 | 19 | 20 | 88144.7813 | -0.0078 |
| 39 | 18 | 21 | 38 | 18 | 20 | 88213.9176 | -0.0081 |
| 39 | 18 | 22 | 38 | 18 | 21 | 88213.9176 | -0.0081 |
| 39 | 17 | 22 | 38 | 17 | 21 | 88296.1235 | 0.0374  |
| 39 | 17 | 23 | 38 | 17 | 22 | 88296.1235 | 0.0374  |
| 40 | 6  | 35 | 39 | 6  | 34 | 88334.1551 | 0.0063  |
| 39 | 16 | 23 | 38 | 16 | 22 | 88394.9776 | 0.0044  |
| 39 | 16 | 24 | 38 | 16 | 23 | 88394.9776 | 0.0045  |

|    |    |    |    |    |    |            |         |
|----|----|----|----|----|----|------------|---------|
| 39 | 15 | 25 | 38 | 15 | 24 | 88515.818  | 0.0041  |
| 39 | 15 | 24 | 38 | 15 | 23 | 88515.818  | 0.0027  |
| 39 | 6  | 33 | 38 | 6  | 32 | 88556.448  | -0.0359 |
| 41 | 5  | 37 | 40 | 5  | 36 | 88594.5369 | -0.0385 |
| 41 | 4  | 37 | 40 | 4  | 36 | 88596.8327 | -0.0265 |
| 39 | 14 | 26 | 38 | 14 | 25 | 88666.2876 | 0.0197  |
| 39 | 14 | 25 | 38 | 14 | 24 | 88666.2876 | -0.0078 |
| 39 | 13 | 26 | 38 | 13 | 25 | 88858.4361 | -0.0217 |
| 39 | 13 | 26 | 38 | 13 | 25 | 88858.4361 | -0.0217 |
| 42 | 3  | 39 | 41 | 3  | 38 | 88902.388  | -0.0341 |
| 42 | 4  | 39 | 41 | 4  | 38 | 88902.388  | 0.0376  |
| 38 | 9  | 29 | 37 | 9  | 28 | 88978.8275 | -0.0549 |
| 39 | 12 | 28 | 38 | 12 | 27 | 89108.705  | 0.0317  |
| 39 | 12 | 27 | 38 | 12 | 26 | 89114.345  | -0.0036 |
| 43 | 2  | 41 | 42 | 2  | 40 | 89239.219  | 0.0012  |
| 39 | 8  | 32 | 38 | 8  | 31 | 89348.646  | 0.0064  |
| 38 | 7  | 31 | 37 | 7  | 30 | 89405.9409 | -0.038  |
| 39 | 11 | 29 | 38 | 11 | 28 | 89435.1411 | -0.0136 |
| 39 | 11 | 28 | 38 | 11 | 27 | 89492.346  | -0.0554 |
| 44 | 1  | 43 | 43 | 1  | 42 | 89590.05   | 0.0231  |
| 39 | 10 | 30 | 38 | 10 | 29 | 89791.812  | -0.015  |
| 39 | 9  | 31 | 38 | 9  | 30 | 89908.7939 | 0.0176  |
| 45 | 0  | 45 | 44 | 0  | 44 | 89946.7829 | 0.0616  |
| 40 | 31 | 9  | 39 | 31 | 8  | 90028.32   | -0.0204 |

|    |    |    |    |    |    |            |         |
|----|----|----|----|----|----|------------|---------|
| 40 | 31 | 10 | 39 | 31 | 9  | 90028.32   | -0.0204 |
| 40 | 7  | 34 | 39 | 7  | 33 | 90039.9431 | 0.0114  |
| 40 | 30 | 10 | 39 | 30 | 9  | 90045.3619 | 0.0101  |
| 40 | 29 | 11 | 39 | 29 | 10 | 90064.0091 | -0.0302 |
| 40 | 28 | 12 | 39 | 28 | 11 | 90084.5811 | -0.0727 |
| 40 | 27 | 14 | 39 | 27 | 13 | 90107.451  | -0.0433 |
| 40 | 27 | 13 | 39 | 27 | 12 | 90107.451  | -0.0433 |
| 40 | 26 | 14 | 39 | 26 | 13 | 90132.89   | -0.0298 |
| 40 | 25 | 16 | 39 | 25 | 15 | 90161.379  | 0.0144  |
| 40 | 25 | 15 | 39 | 25 | 14 | 90161.379  | 0.0144  |
| 40 | 24 | 17 | 39 | 24 | 16 | 90193.3594 | 0.0011  |
| 40 | 24 | 16 | 39 | 24 | 15 | 90193.3594 | 0.0011  |
| 39 | 10 | 29 | 38 | 10 | 28 | 90210.7394 | -0.0358 |
| 40 | 23 | 18 | 39 | 23 | 17 | 90229.5599 | 0.0076  |
| 40 | 23 | 17 | 39 | 23 | 16 | 90229.5599 | 0.0076  |
| 40 | 22 | 19 | 39 | 22 | 18 | 90270.7697 | 0.0126  |
| 40 | 22 | 18 | 39 | 22 | 17 | 90270.7697 | 0.0126  |
| 41 | 6  | 36 | 40 | 6  | 35 | 90305.5441 | -0.0413 |
| 40 | 21 | 20 | 39 | 21 | 19 | 90318.0558 | 0.0649  |
| 40 | 21 | 19 | 39 | 21 | 18 | 90318.0558 | 0.0649  |
| 41 | 5  | 36 | 40 | 5  | 35 | 90335.0406 | -0.0337 |
| 40 | 20 | 21 | 39 | 20 | 20 | 90372.5775 | 0.0271  |
| 40 | 20 | 20 | 39 | 20 | 19 | 90372.5775 | 0.0271  |
| 40 | 6  | 34 | 39 | 6  | 33 | 90409.8236 | 0       |

|    |    |    |    |    |    |            |         |
|----|----|----|----|----|----|------------|---------|
| 40 | 19 | 22 | 39 | 19 | 21 | 90436.1092 | -0.0026 |
| 40 | 19 | 21 | 39 | 19 | 20 | 90436.1092 | -0.0026 |
| 40 | 18 | 23 | 39 | 18 | 22 | 90510.888  | 0.0102  |
| 40 | 18 | 22 | 39 | 18 | 21 | 90510.888  | 0.0102  |
| 42 | 5  | 38 | 41 | 5  | 37 | 90569.533  | 0.0298  |
| 42 | 4  | 38 | 41 | 4  | 37 | 90570.899  | 0.0029  |
| 40 | 16 | 24 | 39 | 16 | 23 | 90706.974  | 0.0125  |
| 40 | 16 | 25 | 39 | 16 | 24 | 90706.974  | 0.0126  |
| 59 | 2  | 57 | 59 | 2  | 58 | 90712.4852 | 0.1315  |
| 40 | 15 | 25 | 39 | 15 | 24 | 90838.1478 | 0.0258  |
| 40 | 15 | 26 | 39 | 15 | 25 | 90838.1478 | 0.0288  |
| 43 | 3  | 40 | 42 | 3  | 39 | 90880.642  | -0.0433 |
| 43 | 4  | 40 | 42 | 4  | 39 | 90880.642  | -0.0015 |
| 40 | 14 | 27 | 39 | 14 | 26 | 91001.839  | 0.0435  |
| 40 | 14 | 26 | 39 | 14 | 25 | 91001.839  | -0.0111 |
| 44 | 2  | 42 | 43 | 2  | 41 | 91218.815  | -0.0174 |
| 44 | 3  | 42 | 43 | 3  | 41 | 91218.815  | -0.0167 |
| 39 | 7  | 32 | 38 | 7  | 31 | 91282.495  | -0.0827 |
| 40 | 8  | 33 | 39 | 8  | 32 | 91468.3965 | -0.0631 |
| 40 | 12 | 29 | 39 | 12 | 28 | 91484.7486 | -0.0599 |
| 40 | 12 | 28 | 39 | 12 | 27 | 91494.7067 | -0.0124 |
| 45 | 1  | 44 | 44 | 1  | 43 | 91570.046  | 0.0033  |
| 39 | 9  | 30 | 38 | 9  | 29 | 91713.9269 | -0.0636 |
| 40 | 11 | 30 | 39 | 11 | 29 | 91835.337  | -0.0076 |

|    |    |    |    |    |    |            |         |
|----|----|----|----|----|----|------------|---------|
| 46 | 1  | 46 | 45 | 1  | 45 | 91926.865  | 0.0701  |
| 40 | 11 | 29 | 39 | 11 | 28 | 91928.148  | 0.0083  |
| 41 | 7  | 35 | 40 | 7  | 34 | 92030.952  | -0.0256 |
| 40 | 10 | 31 | 39 | 10 | 30 | 92183.3173 | -0.0402 |
| 42 | 6  | 37 | 41 | 6  | 36 | 92276.349  | -0.026  |
| 41 | 6  | 35 | 40 | 6  | 34 | 92288.7368 | 0.002   |
| 42 | 5  | 37 | 41 | 5  | 36 | 92295.1832 | -0.0701 |
| 41 | 29 | 12 | 40 | 29 | 11 | 92329.0074 | -0.0499 |
| 41 | 29 | 13 | 40 | 29 | 12 | 92329.0074 | -0.0499 |
| 41 | 28 | 13 | 40 | 28 | 12 | 92351.2252 | 0.0035  |
| 41 | 28 | 14 | 40 | 28 | 13 | 92351.2252 | 0.0035  |
| 41 | 27 | 14 | 40 | 27 | 13 | 92375.7637 | -0.0238 |
| 41 | 27 | 15 | 40 | 27 | 14 | 92375.7637 | -0.0238 |
| 41 | 25 | 17 | 40 | 25 | 16 | 92433.7431 | -0.0123 |
| 41 | 25 | 16 | 40 | 25 | 15 | 92433.7431 | -0.0123 |
| 41 | 24 | 18 | 40 | 24 | 17 | 92468.194  | -0.0051 |
| 41 | 24 | 17 | 40 | 24 | 16 | 92468.194  | -0.0051 |
| 41 | 23 | 18 | 40 | 23 | 17 | 92507.1937 | 0.0155  |
| 41 | 23 | 19 | 40 | 23 | 18 | 92507.1937 | 0.0155  |
| 43 | 5  | 39 | 42 | 5  | 38 | 92544.811  | 0.0082  |
| 43 | 4  | 39 | 42 | 4  | 38 | 92545.69   | 0.0425  |
| 41 | 22 | 19 | 40 | 22 | 18 | 92551.5609 | -0.0089 |
| 41 | 22 | 20 | 40 | 22 | 19 | 92551.5609 | -0.0089 |
| 41 | 21 | 21 | 40 | 21 | 20 | 92602.4837 | 0.0061  |

|    |    |    |    |    |    |            |         |
|----|----|----|----|----|----|------------|---------|
| 41 | 21 | 20 | 40 | 21 | 19 | 92602.4837 | 0.0061  |
| 41 | 20 | 22 | 40 | 20 | 21 | 92661.3271 | 0.0179  |
| 41 | 20 | 21 | 40 | 20 | 20 | 92661.3271 | 0.0179  |
| 41 | 19 | 23 | 40 | 19 | 22 | 92729.8554 | -0.0314 |
| 41 | 19 | 22 | 40 | 19 | 21 | 92729.8554 | -0.0314 |
| 39 | 8  | 31 | 38 | 8  | 30 | 92769.1688 | -0.0656 |
| 41 | 18 | 24 | 40 | 18 | 23 | 92810.635  | 0.0234  |
| 41 | 18 | 23 | 40 | 18 | 22 | 92810.635  | 0.0234  |
| 44 | 4  | 41 | 43 | 4  | 40 | 92859.0677 | 0.0125  |
| 44 | 3  | 41 | 43 | 3  | 40 | 92859.0677 | -0.0119 |
| 41 | 17 | 25 | 40 | 17 | 24 | 92906.742  | 0.0258  |
| 41 | 17 | 24 | 40 | 17 | 23 | 92906.742  | 0.0258  |
| 41 | 16 | 25 | 40 | 16 | 24 | 93022.7024 | 0.0355  |
| 41 | 16 | 26 | 40 | 16 | 25 | 93022.7024 | 0.0358  |
| 40 | 7  | 33 | 39 | 7  | 32 | 93091.236  | -0.0394 |
| 41 | 15 | 27 | 40 | 15 | 26 | 93164.852  | 0.0127  |
| 41 | 15 | 26 | 40 | 15 | 25 | 93164.852  | 0.0065  |
| 45 | 2  | 43 | 44 | 2  | 42 | 93198.4552 | 0.0095  |
| 45 | 3  | 43 | 44 | 3  | 42 | 93198.4552 | 0.0099  |
| 41 | 14 | 27 | 40 | 14 | 26 | 93342.781  | -0.0333 |
| 41 | 14 | 28 | 40 | 14 | 27 | 93342.783  | 0.0753  |
| 46 | 1  | 45 | 45 | 1  | 44 | 93550.034  | 0.0132  |
| 41 | 8  | 34 | 40 | 8  | 33 | 93556.5693 | -0.0287 |
| 41 | 12 | 30 | 40 | 12 | 29 | 93869.042  | 0.0394  |

|    |    |    |    |    |    |            |         |
|----|----|----|----|----|----|------------|---------|
| 41 | 12 | 29 | 40 | 12 | 28 | 93885.897  | -0.0728 |
| 47 | 1  | 47 | 46 | 1  | 46 | 93906.882  | 0.0596  |
| 42 | 7  | 36 | 41 | 7  | 35 | 94012.868  | -0.0352 |
| 42 | 6  | 36 | 41 | 6  | 35 | 94189.448  | -0.0083 |
| 41 | 11 | 31 | 40 | 11 | 30 | 94241.133  | 0.0242  |
| 43 | 6  | 38 | 42 | 6  | 37 | 94247.038  | -0.0117 |
| 43 | 5  | 38 | 42 | 5  | 37 | 94259.027  | -0.0076 |
| 41 | 11 | 30 | 40 | 11 | 29 | 94388.2757 | -0.0755 |
| 40 | 9  | 31 | 39 | 9  | 30 | 94450.1792 | -0.059  |
| 41 | 9  | 33 | 40 | 9  | 32 | 94455.045  | -0.0105 |
| 42 | 31 | 11 | 41 | 31 | 10 | 94553.8365 | -0.0769 |
| 42 | 28 | 15 | 41 | 28 | 14 | 94618.8298 | -0.0369 |
| 42 | 28 | 14 | 41 | 28 | 13 | 94618.8298 | -0.0369 |
| 42 | 27 | 15 | 41 | 27 | 14 | 94645.2347 | -0.0108 |
| 42 | 27 | 16 | 41 | 27 | 15 | 94645.2347 | -0.0108 |
| 42 | 26 | 16 | 41 | 26 | 15 | 94674.646  | 0.0178  |
| 42 | 26 | 17 | 41 | 26 | 16 | 94674.646  | 0.0178  |
| 42 | 25 | 18 | 41 | 25 | 17 | 94707.5342 | 0.0132  |
| 42 | 25 | 17 | 41 | 25 | 16 | 94707.5342 | 0.0132  |
| 42 | 23 | 19 | 41 | 23 | 18 | 94786.4595 | 0.0078  |
| 42 | 23 | 20 | 41 | 23 | 19 | 94786.4595 | 0.0078  |
| 42 | 22 | 20 | 41 | 22 | 19 | 94834.189  | -0.0102 |
| 42 | 22 | 21 | 41 | 22 | 20 | 94834.189  | -0.0102 |
| 45 | 3  | 42 | 44 | 3  | 41 | 94837.577  | -0.0049 |



|    |    |    |    |    |    |            |         |
|----|----|----|----|----|----|------------|---------|
| 41 | 7  | 34 | 40 | 7  | 33 | 94864.5063 | -0.0098 |
| 42 | 21 | 22 | 41 | 21 | 21 | 94888.9986 | 0.0197  |
| 42 | 21 | 21 | 41 | 21 | 20 | 94888.9986 | 0.0197  |
| 42 | 19 | 23 | 41 | 19 | 22 | 95026.268  | 0.076   |
| 42 | 19 | 24 | 41 | 19 | 23 | 95026.268  | 0.076   |
| 40 | 8  | 32 | 39 | 8  | 31 | 95074.4997 | -0.0671 |
| 42 | 18 | 25 | 41 | 18 | 24 | 95113.233  | 0.013   |
| 42 | 18 | 24 | 41 | 18 | 23 | 95113.233  | 0.013   |
| 46 | 2  | 44 | 45 | 2  | 43 | 95178.032  | -0.0202 |
| 42 | 17 | 26 | 41 | 17 | 25 | 95216.947  | 0.0138  |
| 42 | 17 | 25 | 41 | 17 | 24 | 95216.947  | 0.0137  |
| 42 | 16 | 26 | 41 | 16 | 25 | 95342.2462 | 0.0104  |
| 42 | 16 | 27 | 41 | 16 | 26 | 95342.2462 | 0.011   |
| 42 | 15 | 27 | 41 | 15 | 26 | 95496.1845 | 0.0012  |
| 42 | 15 | 28 | 41 | 15 | 27 | 95496.1845 | 0.0138  |
| 47 | 1  | 46 | 46 | 1  | 45 | 95529.957  | -0.0022 |
| 42 | 8  | 35 | 41 | 8  | 34 | 95616.306  | -0.021  |
| 42 | 14 | 29 | 41 | 14 | 28 | 95689.353  | 0.0752  |
| 48 | 1  | 48 | 47 | 1  | 47 | 95886.861  | 0.0585  |
| 42 | 13 | 30 | 41 | 13 | 29 | 95937.5887 | -0.0181 |
| 43 | 7  | 37 | 42 | 7  | 36 | 95988.454  | -0.0115 |
| 43 | 6  | 37 | 42 | 6  | 36 | 96107.635  | -0.0042 |
| 44 | 6  | 39 | 43 | 6  | 38 | 96217.951  | 0.0103  |
| 44 | 5  | 39 | 43 | 5  | 38 | 96225.51   | 0.0186  |

|    |    |    |    |    |    |            |         |
|----|----|----|----|----|----|------------|---------|
| 42 | 12 | 31 | 41 | 12 | 30 | 96261.3457 | 0.0438  |
| 42 | 12 | 30 | 41 | 12 | 29 | 96289.799  | 0.0073  |
| 42 | 7  | 35 | 41 | 7  | 34 | 96631.9835 | -0.0215 |
| 42 | 11 | 32 | 41 | 11 | 31 | 96650.4594 | -0.0001 |
| 42 | 9  | 34 | 41 | 9  | 33 | 96677.2074 | -0.0084 |
| 46 | 3  | 43 | 45 | 3  | 42 | 96816.1759 | 0.003   |
| 46 | 4  | 43 | 45 | 4  | 42 | 96816.1759 | 0.0111  |
| 43 | 30 | 14 | 42 | 30 | 13 | 96838.945  | -0.0766 |
| 43 | 30 | 13 | 42 | 30 | 12 | 96838.945  | -0.0766 |
| 43 | 29 | 15 | 42 | 29 | 14 | 96862.0984 | -0.0176 |
| 43 | 29 | 14 | 42 | 29 | 13 | 96862.0984 | -0.0176 |
| 42 | 11 | 31 | 41 | 11 | 30 | 96879.0232 | -0.0251 |
| 43 | 28 | 16 | 42 | 28 | 15 | 96887.6031 | -0.0136 |
| 43 | 28 | 15 | 42 | 28 | 14 | 96887.6031 | -0.0136 |
| 43 | 27 | 16 | 42 | 27 | 15 | 96915.854  | -0.0442 |
| 43 | 27 | 17 | 42 | 27 | 16 | 96915.854  | -0.0442 |
| 43 | 26 | 17 | 42 | 26 | 16 | 96947.4158 | 0.0056  |
| 43 | 26 | 18 | 42 | 26 | 17 | 96947.4158 | 0.0056  |
| 43 | 25 | 18 | 42 | 25 | 17 | 96982.6893 | -0.0084 |
| 43 | 25 | 19 | 42 | 25 | 18 | 96982.6893 | -0.0084 |
| 43 | 24 | 19 | 42 | 24 | 18 | 97022.4445 | 0.0178  |
| 43 | 24 | 20 | 42 | 24 | 19 | 97022.4445 | 0.0178  |
| 43 | 23 | 20 | 42 | 23 | 19 | 97067.4384 | 0.0202  |
| 43 | 23 | 21 | 42 | 23 | 20 | 97067.4384 | 0.0202  |

|    |    |    |    |    |    |            |         |
|----|----|----|----|----|----|------------|---------|
| 43 | 22 | 22 | 42 | 22 | 21 | 97118.7694 | 0.073   |
| 43 | 22 | 21 | 42 | 22 | 20 | 97118.7694 | 0.073   |
| 47 | 3  | 45 | 46 | 3  | 44 | 97157.6357 | -0.0109 |
| 47 | 2  | 45 | 46 | 2  | 44 | 97157.6357 | -0.011  |
| 43 | 21 | 23 | 42 | 21 | 22 | 97177.5803 | 0.0274  |
| 43 | 21 | 22 | 42 | 21 | 21 | 97177.5803 | 0.0274  |
| 43 | 20 | 23 | 42 | 20 | 22 | 97245.7064 | 0.0659  |
| 43 | 20 | 24 | 42 | 20 | 23 | 97245.7064 | 0.0659  |
| 43 | 19 | 24 | 42 | 19 | 23 | 97325.1408 | 0.0335  |
| 43 | 19 | 25 | 42 | 19 | 24 | 97325.1408 | 0.0335  |
| 43 | 18 | 26 | 42 | 18 | 25 | 97418.8583 | 0.0587  |
| 43 | 18 | 25 | 42 | 18 | 24 | 97418.8583 | 0.0587  |
| 48 | 2  | 47 | 47 | 2  | 46 | 97509.8507 | -0.0057 |
| 48 | 1  | 47 | 47 | 1  | 46 | 97509.8507 | -0.0057 |
| 43 | 8  | 36 | 42 | 8  | 35 | 97651.5451 | 0.0039  |
| 43 | 16 | 27 | 42 | 16 | 26 | 97665.8727 | 0.0493  |
| 43 | 16 | 28 | 42 | 16 | 27 | 97665.8727 | 0.0507  |
| 43 | 15 | 29 | 42 | 15 | 28 | 97832.3397 | 0.0167  |
| 43 | 15 | 28 | 42 | 15 | 27 | 97832.3397 | -0.0085 |
| 49 | 0  | 49 | 48 | 0  | 48 | 97866.774  | 0.0397  |
| 49 | 0  | 49 | 48 | 0  | 48 | 97866.7753 | 0.041   |
| 49 | 1  | 49 | 48 | 1  | 48 | 97866.7753 | 0.041   |
| 44 | 7  | 38 | 43 | 7  | 37 | 97959.7967 | -0.0527 |
| 43 | 14 | 30 | 42 | 14 | 29 | 98041.7171 | -0.0811 |

|    |    |    |    |    |    |            |         |
|----|----|----|----|----|----|------------|---------|
| 43 | 14 | 29 | 42 | 14 | 28 | 98042.2387 | 0.0591  |
| 45 | 6  | 40 | 44 | 6  | 39 | 98189.2136 | -0.0245 |
| 45 | 5  | 40 | 44 | 5  | 39 | 98193.975  | 0.0132  |
| 43 | 7  | 36 | 42 | 7  | 35 | 98414.9686 | 0.0127  |
| 46 | 5  | 42 | 45 | 5  | 41 | 98472.789  | 0.0644  |
| 46 | 4  | 42 | 45 | 4  | 41 | 98472.789  | -0.1185 |
| 43 | 12 | 32 | 42 | 12 | 31 | 98661.5116 | -0.0072 |
| 43 | 12 | 31 | 42 | 12 | 30 | 98708.4402 | -0.0069 |
| 47 | 3  | 44 | 46 | 3  | 43 | 98794.807  | -0.0295 |
| 43 | 9  | 35 | 42 | 9  | 34 | 98863.217  | 0.0344  |
| 43 | 11 | 33 | 42 | 11 | 32 | 99060.5879 | -0.0576 |
| 44 | 30 | 15 | 43 | 30 | 14 | 99105.4671 | -0.0317 |
| 44 | 30 | 14 | 43 | 30 | 13 | 99105.4671 | -0.0317 |
| 44 | 29 | 15 | 43 | 29 | 14 | 99130.1268 | -0.0808 |
| 44 | 29 | 16 | 43 | 29 | 15 | 99130.1268 | -0.0808 |
| 48 | 2  | 46 | 47 | 2  | 45 | 99137.22   | -0.005  |
| 44 | 28 | 16 | 43 | 28 | 15 | 99157.5273 | 0.028   |
| 44 | 28 | 17 | 43 | 28 | 16 | 99157.5273 | 0.028   |
| 44 | 27 | 18 | 43 | 27 | 17 | 99187.784  | 0.0078  |
| 44 | 27 | 17 | 43 | 27 | 16 | 99187.784  | 0.0078  |
| 44 | 26 | 19 | 43 | 26 | 18 | 99221.5094 | -0.0125 |
| 44 | 26 | 18 | 43 | 26 | 17 | 99221.5094 | -0.0125 |
| 44 | 25 | 20 | 43 | 25 | 19 | 99259.3566 | 0.0341  |
| 44 | 25 | 19 | 43 | 25 | 18 | 99259.3566 | 0.0341  |

|    |    |    |    |    |    |            |         |
|----|----|----|----|----|----|------------|---------|
| 43 | 10 | 34 | 42 | 10 | 33 | 99276.6763 | 0.0519  |
| 44 | 23 | 22 | 43 | 23 | 21 | 99350.1612 | 0.0375  |
| 44 | 23 | 21 | 43 | 23 | 20 | 99350.1612 | 0.0375  |
| 44 | 22 | 22 | 43 | 22 | 21 | 99405.1597 | 0.0462  |
| 44 | 22 | 23 | 43 | 22 | 22 | 99405.1597 | 0.0462  |
| 44 | 21 | 24 | 43 | 21 | 23 | 99468.2988 | 0.0391  |
| 44 | 21 | 23 | 43 | 21 | 22 | 99468.2988 | 0.0391  |
| 49 | 1  | 48 | 48 | 1  | 47 | 99489.753  | 0.0424  |
| 44 | 19 | 26 | 43 | 19 | 25 | 99626.7593 | 0.0442  |
| 44 | 19 | 25 | 43 | 19 | 24 | 99626.7593 | 0.0442  |
| 44 | 8  | 37 | 43 | 8  | 36 | 99666.428  | 0.0154  |
| 42 | 9  | 33 | 41 | 9  | 32 | 99782.3739 | -0.0489 |
| 50 | 0  | 50 | 49 | 0  | 49 | 99846.6558 | 0.0391  |
| 44 | 17 | 28 | 43 | 17 | 27 | 99847.8081 | 0.0363  |
| 45 | 7  | 39 | 44 | 7  | 38 | 99928.7    | -0.0096 |
| 45 | 6  | 39 | 44 | 6  | 38 | 99981.0709 | 0.008   |
| 46 | 6  | 41 | 45 | 6  | 40 | 100160.985 | -0.0517 |
| 46 | 5  | 41 | 45 | 5  | 40 | 100163.98  | 0.0072  |
| 44 | 15 | 29 | 43 | 15 | 28 | 100173.591 | 0.0204  |
| 44 | 15 | 30 | 43 | 15 | 29 | 100173.591 | 0.0695  |
| 44 | 7  | 37 | 43 | 7  | 36 | 100224.568 | 0.0374  |
| 44 | 7  | 37 | 43 | 7  | 36 | 100224.568 | 0.0374  |
| 44 | 14 | 31 | 43 | 14 | 30 | 100400.564 | -0.0166 |
| 47 | 4  | 43 | 46 | 4  | 42 | 100449.314 | -0.0681 |

|    |    |    |    |    |    |            |         |
|----|----|----|----|----|----|------------|---------|
| 44 | 13 | 32 | 43 | 13 | 31 | 100693.887 | 0.0305  |
| 44 | 13 | 31 | 43 | 13 | 30 | 100702.04  | -0.0234 |
| 48 | 4  | 45 | 47 | 4  | 44 | 100773.543 | -0.0127 |
| 48 | 3  | 45 | 47 | 3  | 44 | 100773.543 | -0.0154 |
| 43 | 10 | 33 | 42 | 10 | 32 | 100888.138 | -0.0587 |
| 44 | 9  | 36 | 43 | 9  | 35 | 101013.042 | 0.0095  |
| 49 | 3  | 47 | 48 | 3  | 46 | 101116.762 | -0.0207 |
| 49 | 2  | 47 | 48 | 2  | 46 | 101116.762 | -0.0208 |
| 44 | 12 | 32 | 43 | 12 | 31 | 101144.91  | -0.0552 |
| 45 | 31 | 14 | 44 | 31 | 13 | 101348.888 | -0.0965 |
| 45 | 30 | 15 | 44 | 30 | 14 | 101372.877 | -0.099  |
| 45 | 28 | 17 | 44 | 28 | 16 | 101428.52  | -0.0227 |
| 50 | 1  | 49 | 49 | 1  | 48 | 101469.504 | -0.0163 |
| 45 | 26 | 19 | 44 | 26 | 18 | 101497.004 | 0.0074  |
| 45 | 26 | 20 | 44 | 26 | 19 | 101497.004 | 0.0074  |
| 45 | 25 | 20 | 44 | 25 | 19 | 101537.454 | 0.0211  |
| 45 | 25 | 21 | 44 | 25 | 20 | 101537.454 | 0.0211  |
| 45 | 24 | 22 | 44 | 24 | 21 | 101583.025 | 0.0368  |
| 45 | 24 | 21 | 44 | 24 | 20 | 101583.025 | 0.0368  |
| 44 | 10 | 35 | 43 | 10 | 34 | 101596.405 | -0.0141 |
| 45 | 23 | 23 | 44 | 23 | 22 | 101634.64  | 0.0249  |
| 45 | 23 | 22 | 44 | 23 | 21 | 101634.64  | 0.0249  |
| 45 | 22 | 24 | 44 | 22 | 23 | 101693.587 | 0.0837  |
| 45 | 22 | 23 | 44 | 22 | 22 | 101693.587 | 0.0837  |

|    |    |    |    |    |    |            |         |
|----|----|----|----|----|----|------------|---------|
| 45 | 21 | 24 | 44 | 21 | 23 | 101761.188 | 0.0275  |
| 45 | 21 | 25 | 44 | 21 | 24 | 101761.188 | 0.0275  |
| 51 | 0  | 51 | 50 | 0  | 50 | 101826.487 | 0.0386  |
| 51 | 1  | 51 | 50 | 1  | 50 | 101826.487 | 0.0386  |
| 45 | 20 | 25 | 44 | 20 | 24 | 101839.617 | 0.0993  |
| 45 | 20 | 26 | 44 | 20 | 25 | 101839.617 | 0.0993  |
| 46 | 7  | 40 | 45 | 7  | 39 | 101896.237 | -0.0086 |
| 45 | 19 | 27 | 44 | 19 | 26 | 101931.132 | 0.0311  |
| 45 | 19 | 26 | 44 | 19 | 25 | 101931.132 | 0.0311  |
| 45 | 18 | 28 | 44 | 18 | 27 | 102039.317 | 0.0394  |
| 45 | 18 | 27 | 44 | 18 | 26 | 102039.317 | 0.0394  |
| 47 | 6  | 42 | 46 | 6  | 41 | 102133.387 | 0.0165  |
| 47 | 5  | 42 | 46 | 5  | 41 | 102135.164 | -0.021  |
| 45 | 17 | 29 | 44 | 17 | 28 | 102168.716 | 0.064   |
| 45 | 17 | 28 | 44 | 17 | 27 | 102168.716 | 0.0637  |
| 45 | 16 | 29 | 44 | 16 | 28 | 102325.717 | -0.0072 |
| 45 | 16 | 30 | 44 | 16 | 29 | 102325.717 | -0.0014 |
| 48 | 4  | 44 | 47 | 4  | 43 | 102426.052 | -0.0697 |
| 45 | 15 | 30 | 44 | 15 | 29 | 102520.048 | -0.0545 |
| 45 | 15 | 31 | 44 | 15 | 30 | 102520.048 | 0.0394  |
| 49 | 3  | 46 | 48 | 3  | 45 | 102752.266 | -0.0612 |
| 49 | 4  | 46 | 48 | 4  | 45 | 102752.266 | -0.0596 |
| 50 | 3  | 48 | 49 | 3  | 47 | 103096.29  | -0.0271 |
| 50 | 2  | 48 | 49 | 2  | 47 | 103096.29  | -0.0272 |

|    |    |    |    |    |    |            |         |
|----|----|----|----|----|----|------------|---------|
| 45 | 13 | 32 | 44 | 13 | 31 | 103097.779 | 0.003   |
| 45 | 9  | 37 | 44 | 9  | 36 | 103128.214 | 0.0313  |
| 51 | 1  | 50 | 50 | 1  | 49 | 103449.291 | 0.0064  |
| 51 | 2  | 50 | 50 | 2  | 49 | 103449.291 | 0.0064  |
| 46 | 30 | 16 | 45 | 30 | 15 | 103641.45  | -0.0268 |
| 46 | 29 | 17 | 45 | 29 | 16 | 103669.621 | -0.0235 |
| 46 | 28 | 19 | 45 | 28 | 18 | 103700.757 | -0.0175 |
| 46 | 28 | 18 | 45 | 28 | 17 | 103700.757 | -0.0175 |
| 46 | 26 | 20 | 45 | 26 | 19 | 103773.862 | -0.0078 |
| 46 | 26 | 21 | 45 | 26 | 20 | 103773.862 | -0.0078 |
| 52 | 0  | 52 | 51 | 0  | 51 | 103806.261 | 0.0323  |
| 52 | 1  | 52 | 51 | 1  | 51 | 103806.261 | 0.0323  |
| 46 | 25 | 21 | 45 | 25 | 20 | 103817.073 | 0.0074  |
| 46 | 25 | 22 | 45 | 25 | 21 | 103817.073 | 0.0074  |
| 47 | 7  | 41 | 46 | 7  | 40 | 103863.33  | 0.0426  |
| 46 | 24 | 23 | 45 | 24 | 22 | 103865.765 | 0.0168  |
| 46 | 24 | 22 | 45 | 24 | 21 | 103865.765 | 0.0168  |
| 46 | 7  | 39 | 45 | 7  | 38 | 103930.641 | -0.0351 |
| 46 | 22 | 24 | 45 | 22 | 23 | 103983.942 | 0.0213  |
| 46 | 22 | 25 | 45 | 22 | 24 | 103983.942 | 0.0213  |
| 46 | 21 | 26 | 45 | 21 | 25 | 104056.279 | -0.0379 |
| 46 | 21 | 25 | 45 | 21 | 24 | 104056.279 | -0.0379 |
| 48 | 6  | 43 | 47 | 6  | 42 | 104106.225 | -0.0105 |
| 48 | 5  | 43 | 47 | 5  | 42 | 104107.328 | -0.0228 |



|    |    |    |    |    |    |            |         |
|----|----|----|----|----|----|------------|---------|
| 46 | 20 | 26 | 45 | 20 | 25 | 104140.252 | 0.0363  |
| 46 | 20 | 27 | 45 | 20 | 26 | 104140.252 | 0.0363  |
| 46 | 19 | 28 | 45 | 19 | 27 | 104238.383 | 0.0299  |
| 46 | 19 | 27 | 45 | 19 | 26 | 104238.383 | 0.0299  |
| 46 | 18 | 28 | 45 | 18 | 27 | 104354.43  | 0.0392  |
| 46 | 18 | 29 | 45 | 18 | 28 | 104354.433 | 0.0427  |
| 46 | 18 | 28 | 45 | 18 | 27 | 104354.433 | 0.0426  |
| 49 | 4  | 45 | 48 | 4  | 44 | 104403.033 | -0.0528 |
| 49 | 5  | 45 | 48 | 5  | 44 | 104403.033 | -0.0148 |
| 46 | 17 | 30 | 45 | 17 | 29 | 104493.421 | 0.0655  |
| 46 | 17 | 29 | 45 | 17 | 28 | 104493.421 | 0.0648  |
| 45 | 11 | 34 | 44 | 11 | 33 | 104609.669 | -0.0323 |
| 46 | 16 | 30 | 45 | 16 | 29 | 104662.357 | -0.0449 |
| 46 | 16 | 31 | 45 | 16 | 30 | 104662.357 | -0.0334 |
| 44 | 9  | 35 | 43 | 9  | 34 | 104726.297 | -0.0487 |
| 50 | 3  | 47 | 49 | 3  | 46 | 104731.091 | -0.04   |
| 50 | 4  | 47 | 49 | 4  | 46 | 104731.091 | -0.0391 |
| 45 | 8  | 37 | 44 | 8  | 36 | 104848.46  | 0.0487  |
| 46 | 15 | 31 | 45 | 15 | 30 | 104872.13  | -0.0896 |
| 46 | 15 | 32 | 45 | 15 | 31 | 104872.13  | 0.0869  |
| 51 | 3  | 49 | 50 | 3  | 48 | 105075.809 | -0.0145 |
| 51 | 2  | 49 | 50 | 2  | 48 | 105075.809 | -0.0145 |
| 46 | 14 | 33 | 45 | 14 | 32 | 105138.32  | 0.0613  |
| 46 | 14 | 33 | 45 | 14 | 32 | 105138.32  | 0.0613  |

|    |    |    |    |    |    |            |         |
|----|----|----|----|----|----|------------|---------|
| 52 | 1  | 51 | 51 | 1  | 50 | 105428.98  | -0.0208 |
| 53 | 0  | 53 | 52 | 0  | 52 | 105785.987 | 0.0306  |
| 53 | 1  | 53 | 52 | 1  | 52 | 105785.987 | 0.0306  |
| 47 | 31 | 17 | 46 | 31 | 16 | 105883.691 | -0.0714 |
| 47 | 31 | 16 | 46 | 31 | 15 | 105883.691 | -0.0714 |
| 47 | 28 | 19 | 46 | 28 | 18 | 105974.211 | -0.0132 |
| 47 | 28 | 20 | 46 | 28 | 19 | 105974.211 | -0.0132 |
| 47 | 27 | 21 | 46 | 27 | 20 | 106011.036 | -0.0337 |
| 47 | 27 | 20 | 46 | 27 | 19 | 106011.036 | -0.0337 |
| 47 | 26 | 22 | 46 | 26 | 21 | 106052.161 | -0.013  |
| 47 | 26 | 21 | 46 | 26 | 20 | 106052.161 | -0.013  |
| 47 | 25 | 23 | 46 | 25 | 22 | 106098.272 | 0.0119  |
| 47 | 25 | 22 | 46 | 25 | 21 | 106098.272 | 0.0119  |
| 47 | 24 | 24 | 46 | 24 | 23 | 106150.227 | 0.0096  |
| 47 | 24 | 23 | 46 | 24 | 22 | 106150.227 | 0.0096  |
| 47 | 23 | 25 | 46 | 23 | 24 | 106209.118 | -0.0272 |
| 47 | 23 | 24 | 46 | 23 | 23 | 106209.118 | -0.0272 |
| 46 | 11 | 36 | 45 | 11 | 35 | 106256.971 | 0.0058  |
| 47 | 22 | 26 | 46 | 22 | 25 | 106276.467 | 0.0461  |
| 47 | 22 | 25 | 46 | 22 | 24 | 106276.467 | 0.0461  |
| 47 | 21 | 27 | 46 | 21 | 26 | 106353.858 | 0.0627  |
| 47 | 21 | 26 | 46 | 21 | 25 | 106353.858 | 0.0627  |
| 45 | 10 | 35 | 44 | 10 | 34 | 106419.855 | -0.0313 |
| 47 | 20 | 27 | 46 | 20 | 26 | 106443.572 | 0.0508  |

|    |    |    |    |    |    |            |         |
|----|----|----|----|----|----|------------|---------|
| 47 | 20 | 28 | 46 | 20 | 27 | 106443.572 | 0.0508  |
| 47 | 19 | 28 | 46 | 19 | 27 | 106548.607 | 0.0424  |
| 47 | 19 | 29 | 46 | 19 | 28 | 106548.607 | 0.0424  |
| 46 | 8  | 38 | 45 | 8  | 37 | 106592.97  | 0.0366  |
| 47 | 18 | 30 | 46 | 18 | 29 | 106672.929 | 0.0266  |
| 47 | 18 | 29 | 46 | 18 | 28 | 106672.929 | 0.0265  |
| 51 | 3  | 48 | 50 | 3  | 47 | 106709.854 | -0.1071 |
| 51 | 3  | 48 | 50 | 3  | 47 | 106709.873 | -0.0883 |
| 51 | 4  | 48 | 50 | 4  | 47 | 106709.873 | -0.0878 |
| 47 | 17 | 31 | 46 | 17 | 30 | 106822.051 | 0.0191  |
| 47 | 17 | 30 | 46 | 17 | 29 | 106822.051 | 0.0178  |
| 47 | 16 | 32 | 46 | 16 | 31 | 107003.863 | 0.0565  |
| 47 | 16 | 31 | 46 | 16 | 30 | 107003.863 | 0.034   |
| 45 | 9  | 36 | 44 | 9  | 35 | 107007.119 | -0.0068 |
| 52 | 2  | 50 | 51 | 2  | 49 | 107055.256 | -0.0441 |
| 52 | 3  | 50 | 51 | 3  | 49 | 107055.256 | -0.0441 |
| 47 | 9  | 39 | 46 | 9  | 38 | 107265.639 | 0.041   |
| 53 | 1  | 52 | 52 | 1  | 51 | 107408.666 | -0.0025 |
| 53 | 2  | 52 | 52 | 2  | 51 | 107408.666 | -0.0025 |
| 47 | 14 | 34 | 46 | 14 | 33 | 107517.891 | 0.0547  |
| 47 | 14 | 33 | 46 | 14 | 32 | 107521.688 | -0.0729 |
| 48 | 8  | 41 | 47 | 8  | 40 | 107599.54  | 0.0105  |
| 48 | 7  | 41 | 47 | 7  | 40 | 107730.423 | -0.0009 |
| 54 | 1  | 54 | 53 | 1  | 53 | 107765.662 | 0.031   |

|    |    |    |    |    |    |            |         |
|----|----|----|----|----|----|------------|---------|
| 54 | 0  | 54 | 53 | 0  | 53 | 107765.662 | 0.031   |
| 49 | 7  | 43 | 48 | 7  | 42 | 107797.896 | 0.0188  |
| 49 | 6  | 43 | 48 | 6  | 42 | 107806.893 | -0.0116 |
| 47 | 13 | 35 | 46 | 13 | 34 | 107888.117 | 0.0281  |
| 47 | 13 | 34 | 46 | 13 | 33 | 107926.239 | -0.0261 |
| 50 | 6  | 45 | 49 | 6  | 44 | 108053.342 | -0.1044 |
| 48 | 30 | 18 | 47 | 30 | 17 | 108181.604 | -0.0412 |
| 48 | 29 | 20 | 47 | 29 | 19 | 108213.516 | -0.0771 |
| 48 | 28 | 20 | 47 | 28 | 19 | 108248.903 | -0.0177 |
| 48 | 27 | 22 | 47 | 27 | 21 | 108288.168 | 0.0094  |
| 48 | 27 | 21 | 47 | 27 | 20 | 108288.168 | 0.0094  |
| 47 | 12 | 36 | 46 | 12 | 35 | 108323.462 | -0.0548 |
| 48 | 26 | 23 | 47 | 26 | 22 | 108331.926 | -0.0186 |
| 48 | 26 | 22 | 47 | 26 | 21 | 108331.926 | -0.0186 |
| 47 | 8  | 39 | 46 | 8  | 38 | 108337.135 | 0.0663  |
| 51 | 5  | 47 | 50 | 5  | 46 | 108357.526 | -0.0191 |
| 51 | 4  | 47 | 50 | 4  | 46 | 108357.526 | -0.0322 |
| 48 | 25 | 23 | 47 | 25 | 22 | 108381.057 | 0.0024  |
| 48 | 25 | 24 | 47 | 25 | 23 | 108381.057 | 0.0024  |
| 48 | 24 | 24 | 47 | 24 | 23 | 108436.447 | 0.0057  |
| 48 | 24 | 25 | 47 | 24 | 24 | 108436.447 | 0.0057  |
| 48 | 23 | 26 | 47 | 23 | 25 | 108499.317 | 0.0344  |
| 48 | 23 | 25 | 47 | 23 | 24 | 108499.317 | 0.0344  |
| 48 | 22 | 26 | 47 | 22 | 25 | 108571.094 | 0.0325  |

|    |    |    |    |    |    |            |         |
|----|----|----|----|----|----|------------|---------|
| 48 | 22 | 27 | 47 | 22 | 26 | 108571.094 | 0.0325  |
| 47 | 12 | 35 | 46 | 12 | 34 | 108608.063 | -0.0118 |
| 47 | 11 | 37 | 46 | 11 | 36 | 108628.095 | 0.0122  |
| 52 | 3  | 49 | 51 | 3  | 48 | 108688.786 | -0.0233 |
| 52 | 4  | 49 | 51 | 4  | 48 | 108688.786 | -0.023  |
| 48 | 19 | 30 | 47 | 19 | 29 | 108861.841 | 0.0111  |
| 48 | 19 | 29 | 47 | 19 | 28 | 108861.841 | 0.0111  |
| 48 | 18 | 31 | 47 | 18 | 30 | 108994.966 | 0.0308  |
| 48 | 18 | 30 | 47 | 18 | 29 | 108994.966 | 0.0306  |
| 53 | 3  | 51 | 52 | 3  | 50 | 109034.71  | -0.0327 |
| 53 | 2  | 51 | 52 | 2  | 50 | 109034.71  | -0.0327 |
| 46 | 9  | 37 | 45 | 9  | 36 | 109151.861 | 0.0311  |
| 48 | 17 | 32 | 47 | 17 | 31 | 109154.886 | 0.0487  |
| 48 | 17 | 31 | 47 | 17 | 30 | 109154.886 | 0.0461  |
| 48 | 9  | 40 | 47 | 9  | 39 | 109295.429 | 0.0423  |
| 48 | 16 | 32 | 47 | 16 | 31 | 109350.288 | 0.0633  |
| 48 | 16 | 33 | 47 | 16 | 32 | 109350.288 | 0.1064  |
| 54 | 1  | 53 | 53 | 1  | 52 | 109388.295 | 0.0089  |
| 54 | 2  | 53 | 53 | 2  | 52 | 109388.295 | 0.0089  |

---

**S7.2 Measured frequencies and residuals (in MHz) for the rotational transitions of the vibrationally excited state  $\nu_{41}$  of CHT-1-CN-1 in the frequency range of 75-110 GHz using SPFIT/SPCAT suite of programs from Pickett.**

| $J$ | $K_a$ | $K_c$ | $J'$ | $K'_a$ | $K'_c$ | Observed Freq. (MHz) | Residuals (MHz) |
|-----|-------|-------|------|--------|--------|----------------------|-----------------|
| 34  | 5     | 30    | 33   | 5      | 29     | 74919.6378           | 0.0124          |
| 33  | 13    | 20    | 32   | 13     | 19     | 74938.881            | 0.0252          |
| 33  | 13    | 21    | 32   | 13     | 20     | 74938.881            | 0.0305          |
| 34  | 4     | 30    | 33   | 4      | 29     | 74987.9157           | 0.0626          |
| 33  | 12    | 22    | 32   | 12     | 21     | 75079.0719           | 0.0235          |
| 33  | 12    | 21    | 32   | 12     | 20     | 75079.0719           | -0.0825         |
| 35  | 4     | 32    | 34   | 4      | 31     | 75186.712            | 0.0229          |
| 33  | 11    | 23    | 32   | 11     | 22     | 75264.3587           | -0.0092         |
| 33  | 5     | 28    | 32   | 5      | 27     | 75265.3544           | 0.0562          |
| 33  | 11    | 22    | 32   | 11     | 21     | 75266.0994           | 0.0294          |
| 36  | 3     | 34    | 35   | 3      | 33     | 75489.2723           | 0.0642          |
| 36  | 2     | 34    | 35   | 2      | 33     | 75489.2723           | -0.0223         |
| 33  | 10    | 23    | 32   | 10     | 22     | 75534.6396           | -0.0598         |
| 32  | 6     | 26    | 31   | 6      | 25     | 75741.3814           | -0.0336         |
| 37  | 2     | 36    | 36   | 2      | 35     | 75815.8116           | -0.0279         |
| 37  | 1     | 36    | 36   | 1      | 35     | 75815.8116           | -0.0292         |

|    |    |    |    |    |    |            |         |
|----|----|----|----|----|----|------------|---------|
| 33 | 9  | 25 | 32 | 9  | 24 | 75818.7371 | 0.0006  |
| 32 | 7  | 25 | 31 | 7  | 24 | 75883.5731 | -0.0497 |
| 33 | 8  | 26 | 32 | 8  | 25 | 76009.2421 | -0.0485 |
| 38 | 0  | 38 | 37 | 0  | 37 | 76152.1097 | -0.0666 |
| 38 | 1  | 38 | 37 | 1  | 37 | 76152.1097 | -0.0666 |
| 34 | 6  | 29 | 33 | 6  | 28 | 76574.1412 | 0.0911  |
| 35 | 5  | 31 | 34 | 5  | 30 | 76898.3244 | 0.0517  |
| 35 | 4  | 31 | 34 | 4  | 30 | 76942.638  | 0.0255  |
| 33 | 8  | 25 | 32 | 8  | 24 | 77099.0321 | -0.0858 |
| 36 | 4  | 33 | 35 | 4  | 32 | 77165.0663 | 0.0013  |
| 36 | 3  | 33 | 35 | 3  | 32 | 77167.0291 | 0.0046  |
| 34 | 13 | 22 | 33 | 13 | 21 | 77259.5501 | 0.0263  |
| 34 | 13 | 21 | 33 | 13 | 20 | 77259.5501 | 0.015   |
| 34 | 12 | 22 | 33 | 12 | 21 | 77414.2829 | -0.1192 |
| 34 | 12 | 23 | 33 | 12 | 22 | 77414.2829 | 0.0926  |
| 37 | 3  | 35 | 36 | 3  | 34 | 77470.0967 | 0.0088  |
| 37 | 2  | 35 | 36 | 2  | 34 | 77470.0967 | -0.0413 |
| 34 | 11 | 24 | 33 | 11 | 23 | 77619.0981 | -0.0121 |
| 33 | 6  | 27 | 32 | 6  | 26 | 77782.5354 | 0.0856  |
| 38 | 2  | 37 | 37 | 2  | 36 | 77797.5444 | -0.0095 |
| 38 | 1  | 37 | 37 | 1  | 36 | 77797.5444 | -0.0102 |
| 34 | 7  | 28 | 33 | 7  | 27 | 77832.9421 | -0.0062 |
| 34 | 10 | 25 | 33 | 10 | 24 | 77892.4645 | 0.043   |
| 34 | 10 | 24 | 33 | 10 | 23 | 77928.5721 | -0.0164 |

|    |    |    |    |    |    |            |         |
|----|----|----|----|----|----|------------|---------|
| 39 | 0  | 39 | 38 | 0  | 38 | 78133.9891 | -0.0458 |
| 39 | 1  | 39 | 38 | 1  | 38 | 78133.9891 | -0.0458 |
| 34 | 9  | 26 | 33 | 9  | 25 | 78206.8973 | -0.0468 |
| 34 | 8  | 27 | 33 | 8  | 26 | 78332.8754 | -0.0531 |
| 33 | 7  | 26 | 32 | 7  | 25 | 78446.9019 | -0.0182 |
| 34 | 9  | 25 | 33 | 9  | 24 | 78505.1492 | -0.0216 |
| 35 | 6  | 30 | 34 | 6  | 29 | 78587.7243 | 0.0617  |
| 36 | 5  | 32 | 35 | 5  | 31 | 78875.1431 | 0.0525  |
| 37 | 4  | 34 | 36 | 4  | 33 | 79143.6291 | -0.0177 |
| 37 | 3  | 34 | 36 | 3  | 33 | 79144.8638 | 0.033   |
| 38 | 3  | 36 | 37 | 3  | 35 | 79451.0572 | 0.0272  |
| 38 | 2  | 36 | 37 | 2  | 35 | 79451.0572 | -0.0017 |
| 35 | 13 | 22 | 34 | 13 | 21 | 79585.0971 | 0.0033  |
| 35 | 13 | 23 | 34 | 13 | 22 | 79585.0971 | 0.0271  |
| 34 | 6  | 28 | 33 | 6  | 27 | 79723.7044 | 0.0904  |
| 35 | 12 | 24 | 34 | 12 | 23 | 79755.5744 | 0.1694  |
| 35 | 12 | 23 | 34 | 12 | 22 | 79755.5744 | -0.2436 |
| 39 | 2  | 38 | 38 | 2  | 37 | 79779.2451 | -0.0025 |
| 39 | 1  | 38 | 38 | 1  | 37 | 79779.2451 | -0.0029 |
| 34 | 8  | 26 | 33 | 8  | 25 | 79792.2031 | -0.0556 |
| 35 | 7  | 29 | 34 | 7  | 28 | 79968.1536 | -0.0147 |
| 40 | 0  | 40 | 39 | 0  | 39 | 80115.8285 | -0.0268 |
| 40 | 1  | 40 | 39 | 1  | 39 | 80115.8285 | -0.0268 |
| 35 | 10 | 26 | 34 | 10 | 25 | 80278.7761 | -0.0237 |



|    |    |    |    |    |    |            |         |
|----|----|----|----|----|----|------------|---------|
| 35 | 10 | 25 | 34 | 10 | 24 | 80339.178  | -0.0253 |
| 36 | 6  | 31 | 35 | 6  | 30 | 80587.9131 | 0.0235  |
| 35 | 9  | 27 | 34 | 9  | 26 | 80592.7882 | -0.0184 |
| 35 | 8  | 28 | 34 | 8  | 27 | 80631.6233 | -0.0034 |
| 37 | 5  | 33 | 36 | 5  | 32 | 80850.9945 | 0.0569  |
| 36 | 5  | 31 | 35 | 5  | 30 | 80852.7576 | 0.0366  |
| 37 | 4  | 33 | 36 | 4  | 32 | 80869.1157 | 0.0305  |
| 34 | 7  | 27 | 33 | 7  | 26 | 80918.1593 | 0.0312  |
| 38 | 4  | 35 | 37 | 4  | 34 | 81122.4539 | 0.0015  |
| 38 | 3  | 35 | 37 | 3  | 34 | 81123.0832 | -0.0804 |
| 39 | 3  | 37 | 38 | 3  | 36 | 81432.0529 | 0.0299  |
| 39 | 2  | 37 | 38 | 2  | 36 | 81432.0529 | 0.0133  |
| 35 | 6  | 29 | 34 | 6  | 28 | 81586.3203 | 0.0741  |
| 40 | 2  | 39 | 39 | 2  | 38 | 81760.91   | -0.0079 |
| 40 | 1  | 39 | 39 | 1  | 38 | 81760.91   | -0.0082 |
| 36 | 13 | 24 | 35 | 13 | 23 | 81915.7832 | 0.0523  |
| 36 | 13 | 23 | 35 | 13 | 22 | 81915.7832 | 0.0037  |
| 36 | 7  | 30 | 35 | 7  | 29 | 82071.6786 | 0.0038  |
| 41 | 1  | 41 | 40 | 1  | 40 | 82097.5933 | -0.0429 |
| 41 | 0  | 41 | 40 | 0  | 40 | 82097.5933 | -0.0429 |
| 36 | 12 | 25 | 35 | 12 | 24 | 82102.9372 | -0.0866 |
| 36 | 12 | 24 | 35 | 12 | 23 | 82103.8182 | 0.0077  |
| 36 | 11 | 26 | 35 | 11 | 25 | 82351.6308 | -0.0179 |
| 36 | 11 | 25 | 35 | 11 | 24 | 82361.7279 | -0.0259 |

|    |    |    |    |    |    |            |         |
|----|----|----|----|----|----|------------|---------|
| 35 | 8  | 27 | 34 | 8  | 26 | 82503.9023 | 0.0419  |
| 37 | 6  | 32 | 36 | 6  | 31 | 82578.1151 | 0.0127  |
| 36 | 10 | 27 | 35 | 10 | 26 | 82671.7695 | -0.006  |
| 37 | 5  | 32 | 36 | 5  | 31 | 82759.6965 | 0.0302  |
| 38 | 5  | 34 | 37 | 5  | 33 | 82826.4165 | 0.0288  |
| 38 | 4  | 34 | 37 | 4  | 33 | 82837.8907 | 0.0493  |
| 36 | 8  | 29 | 35 | 8  | 28 | 82901.1426 | -0.0098 |
| 36 | 9  | 28 | 35 | 9  | 27 | 82972.0014 | -0.0322 |
| 39 | 4  | 36 | 38 | 4  | 35 | 83101.7263 | 0.2475  |
| 39 | 3  | 36 | 38 | 3  | 35 | 83101.7263 | -0.1776 |
| 39 | 4  | 36 | 38 | 4  | 35 | 83101.7263 | 0.2475  |
| 39 | 3  | 36 | 38 | 3  | 35 | 83101.7263 | -0.1776 |
| 39 | 4  | 36 | 38 | 4  | 35 | 83101.7263 | 0.2475  |
| 39 | 3  | 36 | 38 | 3  | 35 | 83101.7263 | -0.1776 |
| 36 | 6  | 30 | 35 | 6  | 29 | 83399.4069 | 0.0698  |
| 40 | 2  | 38 | 39 | 2  | 37 | 83413.0667 | 0.0012  |
| 40 | 3  | 38 | 39 | 3  | 37 | 83413.0667 | 0.0108  |
| 41 | 2  | 40 | 40 | 2  | 39 | 83742.5856 | 0.0238  |
| 41 | 1  | 40 | 40 | 1  | 39 | 83742.5856 | 0.0236  |
| 42 | 0  | 42 | 41 | 0  | 41 | 84079.3371 | -0.0392 |
| 42 | 1  | 42 | 41 | 1  | 41 | 84079.3371 | -0.0392 |
| 37 | 7  | 31 | 36 | 7  | 30 | 84146.2294 | 0.0059  |
| 37 | 13 | 25 | 36 | 13 | 24 | 84251.8616 | 0.096   |
| 37 | 13 | 24 | 36 | 13 | 23 | 84251.8616 | -0.0009 |

|    |    |    |    |    |    |            |         |
|----|----|----|----|----|----|------------|---------|
| 38 | 6  | 33 | 37 | 6  | 32 | 84561.192  | 0.0361  |
| 38 | 5  | 33 | 37 | 5  | 32 | 84683.6808 | 0.0161  |
| 37 | 11 | 27 | 36 | 11 | 26 | 84729.8815 | -0.0184 |
| 37 | 11 | 26 | 36 | 11 | 25 | 84747.3984 | 0.003   |
| 39 | 5  | 35 | 38 | 5  | 34 | 84801.8304 | 0.0245  |
| 39 | 4  | 35 | 38 | 4  | 34 | 84809.0084 | 0.0305  |
| 37 | 10 | 28 | 36 | 10 | 27 | 85069.7646 | -0.0922 |
| 37 | 8  | 30 | 36 | 8  | 29 | 85138.2666 | -0.0052 |
| 37 | 6  | 31 | 36 | 6  | 30 | 85193.0539 | 0.0321  |
| 36 | 8  | 28 | 35 | 8  | 27 | 85202.1056 | -0.0243 |
| 37 | 10 | 27 | 36 | 10 | 26 | 85226.9058 | -0.0544 |
| 37 | 9  | 29 | 36 | 9  | 28 | 85339.7009 | -0.0348 |
| 41 | 3  | 39 | 40 | 3  | 38 | 85394.1474 | 0.028   |
| 41 | 2  | 39 | 40 | 2  | 38 | 85394.1474 | 0.0226  |
| 36 | 7  | 29 | 35 | 7  | 28 | 85527.3156 | 0.0496  |
| 42 | 1  | 41 | 41 | 1  | 40 | 85724.1806 | 0.0036  |
| 42 | 2  | 41 | 41 | 2  | 40 | 85724.1806 | 0.0036  |
| 43 | 0  | 43 | 42 | 0  | 42 | 86061.0403 | -0.0345 |
| 43 | 1  | 43 | 42 | 1  | 42 | 86061.0403 | -0.0345 |
| 38 | 7  | 32 | 37 | 7  | 31 | 86195.3065 | -0.0222 |
| 37 | 9  | 28 | 36 | 9  | 27 | 86275.6968 | -0.0248 |
| 39 | 6  | 34 | 38 | 6  | 33 | 86539.3631 | 0.0162  |
| 38 | 13 | 25 | 37 | 13 | 24 | 86593.5819 | -0.0589 |
| 38 | 13 | 26 | 37 | 13 | 25 | 86593.5819 | 0.1302  |

|    |    |    |    |    |    |            |         |
|----|----|----|----|----|----|------------|---------|
| 39 | 5  | 34 | 38 | 5  | 33 | 86620.8953 | 0.0081  |
| 40 | 5  | 36 | 39 | 5  | 35 | 86777.4512 | 0.0409  |
| 40 | 4  | 36 | 39 | 4  | 35 | 86781.8754 | 0.0064  |
| 38 | 12 | 26 | 37 | 12 | 25 | 86821.5282 | 0.0012  |
| 38 | 6  | 32 | 37 | 6  | 31 | 86991.7258 | 0.0244  |
| 38 | 11 | 28 | 37 | 11 | 27 | 87116.2173 | 0.014   |
| 38 | 11 | 27 | 37 | 11 | 26 | 87145.8466 | -0.008  |
| 38 | 8  | 31 | 37 | 8  | 30 | 87340.9951 | 0.0168  |
| 42 | 2  | 40 | 41 | 2  | 39 | 87375.2101 | 0.0027  |
| 42 | 3  | 40 | 41 | 3  | 39 | 87375.2101 | 0.0058  |
| 38 | 10 | 29 | 37 | 10 | 28 | 87470.8542 | 0.0034  |
| 37 | 7  | 30 | 36 | 7  | 29 | 87652.444  | 0.018   |
| 38 | 9  | 30 | 37 | 9  | 29 | 87690.6725 | -0.0158 |
| 43 | 1  | 42 | 42 | 1  | 41 | 87705.772  | 0.0111  |
| 43 | 2  | 42 | 42 | 2  | 41 | 87705.772  | 0.0111  |
| 38 | 10 | 28 | 37 | 10 | 27 | 87715.4695 | 0.0945  |
| 37 | 8  | 29 | 36 | 8  | 28 | 87852.2453 | -0.0144 |
| 44 | 0  | 44 | 43 | 0  | 43 | 88042.6765 | -0.0538 |
| 44 | 1  | 44 | 43 | 1  | 43 | 88042.6765 | -0.0538 |
| 39 | 7  | 33 | 38 | 7  | 32 | 88222.8999 | -0.0305 |
| 40 | 6  | 35 | 39 | 6  | 34 | 88514.4205 | -0.0187 |
| 40 | 5  | 35 | 39 | 5  | 34 | 88568.1042 | 0.0351  |
| 41 | 4  | 37 | 40 | 4  | 36 | 88756.08   | 0.0068  |
| 39 | 6  | 33 | 38 | 6  | 32 | 88810.4908 | 0.0411  |

|    |    |    |    |    |    |            |         |
|----|----|----|----|----|----|------------|---------|
| 39 | 13 | 27 | 38 | 13 | 26 | 88941.3442 | 0.2582  |
| 39 | 13 | 26 | 38 | 13 | 25 | 88941.3442 | -0.1027 |
| 38 | 9  | 29 | 37 | 9  | 28 | 88970.7526 | 0.0102  |
| 42 | 3  | 39 | 41 | 3  | 38 | 89039.735  | -0.0759 |
| 39 | 12 | 28 | 38 | 12 | 27 | 89187.811  | 0.0497  |
| 39 | 12 | 27 | 38 | 12 | 26 | 89192.5041 | -0.0219 |
| 43 | 2  | 41 | 42 | 2  | 40 | 89356.3225 | 0.0175  |
| 43 | 3  | 41 | 42 | 3  | 40 | 89356.3225 | 0.0193  |
| 39 | 8  | 32 | 38 | 8  | 31 | 89508.5501 | -0.0626 |
| 39 | 11 | 29 | 38 | 11 | 28 | 89510.3211 | 0.0152  |
| 39 | 11 | 28 | 38 | 11 | 27 | 89559.4883 | -0.0281 |
| 38 | 7  | 31 | 37 | 7  | 30 | 89661.1961 | 0.04    |
| 44 | 2  | 43 | 43 | 2  | 42 | 89687.3201 | 0.0085  |
| 44 | 1  | 43 | 43 | 1  | 42 | 89687.3201 | 0.0085  |
| 39 | 10 | 30 | 38 | 10 | 29 | 89871.7464 | -0.0357 |
| 39 | 9  | 31 | 38 | 9  | 30 | 90019.6424 | -0.0317 |
| 45 | 1  | 45 | 44 | 1  | 44 | 90024.2651 | -0.0767 |
| 40 | 7  | 34 | 39 | 7  | 33 | 90233.062  | -0.0022 |
| 39 | 10 | 29 | 38 | 10 | 28 | 90243.0533 | 0.0085  |
| 38 | 8  | 30 | 37 | 8  | 29 | 90423.2395 | -0.0258 |
| 41 | 6  | 36 | 40 | 6  | 35 | 90487.7577 | 0.0285  |
| 40 | 6  | 34 | 39 | 6  | 33 | 90655.4731 | 0.0029  |
| 42 | 5  | 38 | 41 | 5  | 37 | 90729.5887 | 0.0003  |
| 42 | 4  | 38 | 41 | 4  | 37 | 90731.3036 | 0.0251  |

|    |    |    |    |    |    |            |         |
|----|----|----|----|----|----|------------|---------|
| 43 | 3  | 40 | 42 | 3  | 39 | 91019.5186 | 0.0099  |
| 44 | 2  | 42 | 43 | 2  | 41 | 91337.4234 | 0.0136  |
| 44 | 3  | 42 | 43 | 3  | 41 | 91337.4234 | 0.0146  |
| 40 | 12 | 29 | 39 | 12 | 28 | 91564.3773 | -0.03   |
| 39 | 7  | 32 | 38 | 7  | 31 | 91567.7034 | 0.0503  |
| 40 | 12 | 28 | 39 | 12 | 27 | 91572.7539 | 0.0119  |
| 40 | 8  | 33 | 39 | 8  | 32 | 91641.8279 | -0.0359 |
| 45 | 2  | 44 | 44 | 2  | 43 | 91668.8335 | 0.0067  |
| 45 | 1  | 44 | 44 | 1  | 43 | 91668.8335 | 0.0067  |
| 39 | 9  | 30 | 38 | 9  | 29 | 91703.4054 | 0.0049  |
| 39 | 9  | 30 | 38 | 9  | 29 | 91703.4054 | 0.0049  |
| 40 | 11 | 30 | 39 | 11 | 29 | 91911.5854 | -0.0025 |
| 40 | 11 | 29 | 39 | 11 | 28 | 91991.5467 | -0.0322 |
| 46 | 1  | 46 | 45 | 1  | 45 | 92005.8647 | -0.0434 |
| 46 | 0  | 46 | 45 | 0  | 45 | 92005.8647 | -0.0434 |
| 41 | 7  | 35 | 40 | 7  | 34 | 92229.5415 | -0.0335 |
| 40 | 10 | 31 | 39 | 10 | 30 | 92268.8159 | -0.0642 |
| 40 | 9  | 32 | 39 | 9  | 31 | 92321.8434 | -0.014  |
| 42 | 5  | 37 | 41 | 5  | 36 | 92482.5597 | -0.0721 |
| 41 | 6  | 35 | 40 | 6  | 34 | 92526.7962 | -0.0257 |
| 43 | 5  | 39 | 42 | 5  | 38 | 92706.2525 | 0.0228  |
| 43 | 4  | 39 | 42 | 4  | 38 | 92707.2944 | 0.0332  |
| 40 | 10 | 30 | 39 | 10 | 29 | 92817.9189 | 0.0362  |
| 39 | 8  | 31 | 38 | 8  | 30 | 92891.8344 | 0.0345  |

|    |    |    |    |    |    |            |         |
|----|----|----|----|----|----|------------|---------|
| 44 | 3  | 41 | 43 | 3  | 40 | 92999.3187 | -0.0285 |
| 45 | 2  | 43 | 44 | 2  | 42 | 93318.5336 | 0.0179  |
| 45 | 3  | 43 | 44 | 3  | 42 | 93318.5336 | 0.0185  |
| 40 | 7  | 33 | 39 | 7  | 32 | 93396.493  | 0.0452  |
| 46 | 2  | 45 | 45 | 2  | 44 | 93650.2984 | -0.0063 |
| 46 | 1  | 45 | 45 | 1  | 44 | 93650.2984 | -0.0063 |
| 41 | 13 | 29 | 40 | 13 | 28 | 93655.5317 | 0.0544  |
| 41 | 13 | 28 | 40 | 13 | 27 | 93656.7279 | 0.0142  |
| 41 | 8  | 34 | 40 | 8  | 33 | 93742.5992 | -0.056  |
| 41 | 12 | 30 | 40 | 12 | 29 | 93949.0839 | 0.0566  |
| 41 | 12 | 29 | 40 | 12 | 28 | 93963.2827 | -0.041  |
| 47 | 0  | 47 | 46 | 0  | 46 | 93987.3864 | -0.0419 |
| 47 | 1  | 47 | 46 | 1  | 46 | 93987.3864 | -0.0419 |
| 42 | 7  | 36 | 41 | 7  | 35 | 94215.9222 | 0.0152  |
| 42 | 6  | 36 | 41 | 6  | 35 | 94421.37   | 0.0126  |
| 43 | 6  | 38 | 42 | 6  | 37 | 94432.3015 | 0.0501  |
| 43 | 5  | 38 | 42 | 5  | 37 | 94446.6119 | -0.0245 |
| 40 | 9  | 31 | 39 | 9  | 30 | 94448.1022 | 0.058   |
| 41 | 9  | 33 | 40 | 9  | 32 | 94593.0724 | -0.0743 |
| 41 | 10 | 32 | 40 | 10 | 31 | 94657.673  | 0.0166  |
| 44 | 5  | 40 | 43 | 5  | 39 | 94683.2802 | 0.0465  |
| 44 | 4  | 40 | 43 | 4  | 39 | 94683.8009 | -0.059  |
| 45 | 3  | 42 | 44 | 3  | 41 | 94979.3239 | 0.022   |
| 41 | 7  | 34 | 40 | 7  | 33 | 95178.7898 | -0.0138 |

|    |    |    |    |    |    |            |         |
|----|----|----|----|----|----|------------|---------|
| 40 | 8  | 32 | 39 | 8  | 31 | 95242.4987 | 0.0362  |
| 46 | 3  | 44 | 45 | 3  | 43 | 95299.6341 | 0.0176  |
| 46 | 2  | 44 | 45 | 2  | 43 | 95299.6341 | 0.0173  |
| 41 | 10 | 31 | 40 | 10 | 30 | 95446.6166 | 0.0653  |
| 47 | 1  | 46 | 46 | 1  | 45 | 95631.7704 | 0.0269  |
| 42 | 8  | 35 | 41 | 8  | 34 | 95813.88   | -0.0482 |
| 48 | 0  | 48 | 47 | 0  | 47 | 95968.8686 | -0.0325 |
| 48 | 1  | 48 | 47 | 1  | 47 | 95968.8686 | -0.0325 |
| 42 | 13 | 29 | 41 | 13 | 28 | 96025.1695 | 0.0392  |
| 43 | 7  | 37 | 42 | 7  | 36 | 96194.928  | -0.0549 |
| 43 | 6  | 37 | 42 | 6  | 36 | 96334.8159 | -0.0248 |
| 42 | 12 | 31 | 41 | 12 | 30 | 96341.7441 | 0.0173  |
| 42 | 12 | 30 | 41 | 12 | 29 | 96365.7821 | -0.0017 |
| 44 | 6  | 39 | 43 | 6  | 38 | 96404.4725 | -0.0159 |
| 44 | 5  | 39 | 43 | 5  | 38 | 96413.5796 | -0.0334 |
| 45 | 5  | 41 | 44 | 5  | 40 | 96660.5736 | -0.0035 |
| 42 | 11 | 32 | 41 | 11 | 31 | 96730.591  | -0.0515 |
| 42 | 9  | 34 | 41 | 9  | 33 | 96830.4836 | -0.0132 |
| 42 | 11 | 31 | 41 | 11 | 30 | 96929.0882 | -0.0097 |
| 42 | 7  | 35 | 41 | 7  | 34 | 96945.8193 | 0.0017  |
| 46 | 3  | 43 | 45 | 3  | 42 | 96959.3688 | 0.0164  |
| 42 | 10 | 33 | 41 | 10 | 32 | 97033.0852 | -0.0001 |
| 47 | 3  | 45 | 46 | 3  | 44 | 97280.7493 | 0.0416  |
| 47 | 2  | 45 | 46 | 2  | 44 | 97280.7493 | 0.0414  |



|    |    |    |    |    |    |            |         |
|----|----|----|----|----|----|------------|---------|
| 41 | 8  | 33 | 40 | 8  | 32 | 97466.804  | 0.0366  |
| 48 | 1  | 47 | 47 | 1  | 46 | 97613.1533 | 0.0117  |
| 48 | 2  | 47 | 47 | 2  | 46 | 97613.1533 | 0.0117  |
| 43 | 8  | 36 | 42 | 8  | 35 | 97859.3744 | 0.0262  |
| 49 | 0  | 49 | 48 | 0  | 48 | 97950.3793 | 0.0537  |
| 49 | 1  | 49 | 48 | 1  | 48 | 97950.3793 | 0.0537  |
| 44 | 7  | 38 | 43 | 7  | 37 | 98169.1177 | -0.0451 |
| 44 | 6  | 38 | 43 | 6  | 37 | 98263.0864 | -0.043  |
| 45 | 6  | 40 | 44 | 6  | 39 | 98377.0619 | -0.0115 |
| 45 | 5  | 40 | 44 | 5  | 39 | 98382.8428 | 0.0228  |
| 43 | 13 | 31 | 42 | 13 | 30 | 98397.6722 | 0.0571  |
| 43 | 13 | 30 | 42 | 13 | 29 | 98401.5707 | 0.0335  |
| 43 | 7  | 36 | 42 | 7  | 35 | 98721.7861 | -0.04   |
| 43 | 12 | 32 | 42 | 12 | 31 | 98742.4451 | 0.0321  |
| 43 | 12 | 31 | 42 | 12 | 30 | 98782.1445 | 0.0082  |
| 47 | 4  | 44 | 46 | 4  | 43 | 98939.476  | 0.0003  |
| 47 | 3  | 44 | 46 | 3  | 43 | 98939.476  | -0.0056 |
| 43 | 9  | 35 | 42 | 9  | 34 | 99032.0754 | -0.0458 |
| 48 | 3  | 46 | 47 | 3  | 45 | 99261.8985 | 0.1142  |
| 48 | 2  | 46 | 47 | 2  | 45 | 99261.8985 | 0.1141  |
| 43 | 11 | 32 | 42 | 11 | 31 | 99446.8572 | 0.0429  |
| 42 | 8  | 34 | 41 | 8  | 33 | 99563.0777 | -0.0271 |
| 49 | 1  | 48 | 48 | 1  | 47 | 99594.5019 | 0.0048  |
| 49 | 2  | 48 | 48 | 2  | 47 | 99594.5019 | 0.0048  |

|    |    |    |    |    |    |            |         |
|----|----|----|----|----|----|------------|---------|
| 42 | 9  | 33 | 41 | 9  | 32 | 99834.6979 | 0.0775  |
| 44 | 8  | 37 | 43 | 8  | 36 | 99882.9374 | -0.0358 |
| 50 | 1  | 50 | 49 | 1  | 49 | 99931.6777 | -0.023  |
| 50 | 0  | 50 | 49 | 0  | 49 | 99931.6777 | -0.023  |
| 45 | 6  | 39 | 44 | 6  | 38 | 100202.608 | -0.0733 |
| 46 | 5  | 41 | 45 | 5  | 40 | 100353.762 | 0.035   |
| 44 | 7  | 37 | 43 | 7  | 36 | 100521.353 | -0.0234 |
| 47 | 5  | 43 | 46 | 5  | 42 | 100616.245 | 0.0828  |
| 47 | 4  | 43 | 46 | 4  | 42 | 100616.245 | -0.0534 |
| 44 | 13 | 31 | 43 | 13 | 30 | 100786.779 | 0.0625  |
| 44 | 9  | 36 | 43 | 9  | 35 | 101197.51  | -0.0844 |
| 49 | 2  | 47 | 48 | 2  | 46 | 101242.865 | 0.0227  |
| 49 | 3  | 47 | 48 | 3  | 46 | 101242.865 | 0.0228  |
| 43 | 8  | 35 | 42 | 8  | 34 | 101538.285 | -0.1038 |
| 50 | 2  | 49 | 49 | 2  | 48 | 101575.835 | 0.0266  |
| 50 | 1  | 49 | 49 | 1  | 48 | 101575.835 | 0.0266  |
| 51 | 1  | 51 | 50 | 1  | 50 | 101913.004 | -0.0216 |
| 51 | 0  | 51 | 50 | 0  | 50 | 101913.004 | -0.0216 |
| 46 | 7  | 40 | 45 | 7  | 39 | 102109.624 | -0.0196 |
| 47 | 6  | 42 | 46 | 6  | 41 | 102323.735 | 0.0187  |
| 43 | 9  | 34 | 42 | 9  | 33 | 102409.303 | 0.0239  |
| 48 | 5  | 44 | 47 | 5  | 43 | 102594.381 | 0.0398  |
| 48 | 5  | 44 | 47 | 5  | 43 | 102594.381 | 0.0398  |
| 48 | 4  | 44 | 47 | 4  | 43 | 102594.381 | -0.0414 |

|    |    |    |    |    |    |            |         |
|----|----|----|----|----|----|------------|---------|
| 49 | 3  | 46 | 48 | 3  | 45 | 102899.853 | -0.0667 |
| 45 | 13 | 32 | 44 | 13 | 31 | 103181.698 | 0.0321  |
| 50 | 3  | 48 | 49 | 3  | 47 | 103223.915 | 0.0369  |
| 50 | 2  | 48 | 49 | 2  | 47 | 103223.915 | 0.0369  |
| 51 | 1  | 50 | 50 | 1  | 49 | 103557.072 | -0.0025 |
| 51 | 2  | 50 | 50 | 2  | 49 | 103557.072 | -0.0025 |
| 46 | 8  | 39 | 45 | 8  | 38 | 103881.131 | -0.0001 |
| 52 | 1  | 52 | 51 | 1  | 51 | 103894.3   | 0.0017  |
| 52 | 0  | 52 | 51 | 0  | 51 | 103894.3   | 0.0017  |
| 45 | 11 | 35 | 44 | 11 | 34 | 103963.542 | 0.01    |
| 47 | 6  | 41 | 46 | 6  | 40 | 104104.968 | -0.0079 |
| 46 | 7  | 39 | 45 | 7  | 38 | 104207.481 | -0.0635 |
| 48 | 6  | 43 | 47 | 6  | 42 | 104297.846 | 0.0097  |
| 48 | 5  | 43 | 47 | 5  | 42 | 104299.198 | -0.0205 |
| 49 | 4  | 45 | 48 | 4  | 44 | 104572.775 | -0.0122 |
| 49 | 5  | 45 | 48 | 5  | 44 | 104572.775 | 0.0361  |
| 51 | 2  | 49 | 50 | 2  | 48 | 105204.961 | 0.0733  |
| 51 | 3  | 49 | 50 | 3  | 48 | 105204.961 | 0.0733  |
| 52 | 2  | 51 | 51 | 2  | 50 | 105538.304 | 0.01    |
| 52 | 1  | 51 | 51 | 1  | 50 | 105538.304 | 0.01    |
| 46 | 13 | 34 | 45 | 13 | 33 | 105568.412 | 0.0853  |
| 46 | 13 | 33 | 45 | 13 | 32 | 105587.726 | 0.0472  |
| 47 | 8  | 40 | 46 | 8  | 39 | 105863.001 | -0.081  |
| 53 | 0  | 53 | 52 | 0  | 52 | 105875.432 | -0.0867 |

|    |    |    |    |    |    |            |         |
|----|----|----|----|----|----|------------|---------|
| 53 | 1  | 53 | 52 | 1  | 52 | 105875.432 | -0.0867 |
| 48 | 6  | 42 | 47 | 6  | 41 | 106064.039 | 0.0603  |
| 47 | 7  | 40 | 46 | 7  | 39 | 106090.081 | -0.1201 |
| 50 | 4  | 46 | 49 | 4  | 45 | 106551.366 | 0.0103  |
| 51 | 3  | 48 | 50 | 3  | 47 | 106860.554 | 0.0357  |
| 46 | 8  | 38 | 45 | 8  | 37 | 106958.083 | -0.1038 |
| 52 | 2  | 50 | 51 | 2  | 49 | 107185.915 | 0.0472  |
| 52 | 3  | 50 | 51 | 3  | 49 | 107185.915 | 0.0472  |
| 54 | 0  | 54 | 53 | 0  | 53 | 107856.677 | -0.0083 |
| 54 | 1  | 54 | 53 | 1  | 53 | 107856.677 | -0.0083 |
| 48 | 7  | 41 | 47 | 7  | 40 | 107993.523 | 0.0201  |
| 49 | 7  | 43 | 48 | 7  | 42 | 108015.355 | -0.0908 |
| 49 | 6  | 43 | 48 | 6  | 42 | 108026.434 | -0.0871 |
| 50 | 5  | 45 | 49 | 5  | 44 | 108247.76  | -0.3547 |
| 50 | 6  | 45 | 49 | 6  | 44 | 108247.76  | 0.1658  |
| 51 | 4  | 47 | 50 | 4  | 46 | 108530.112 | 0.0141  |
| 47 | 11 | 37 | 46 | 11 | 36 | 108742.349 | -0.0568 |
| 52 | 3  | 49 | 51 | 3  | 48 | 108840.874 | 0.0189  |
| 53 | 3  | 51 | 52 | 3  | 50 | 109166.912 | 0.0961  |
| 53 | 2  | 51 | 52 | 2  | 50 | 109166.912 | 0.0961  |

---

**S7.3 Measured frequencies and residuals (in MHz) for the rotational transitions of the vibrationally excited state  $2\nu_{42}$  of CHT-1-CN-1 in the frequency range of 75-110 GHz using SPFIT/SPCAT suite of programs from Pickett.**

| $J$ | $K_a$ | $K_c$ | $J'$ | $K'_a$ | $K'_c$ | Observed Freq. (MHz) | Residuals (MHz) |
|-----|-------|-------|------|--------|--------|----------------------|-----------------|
| 36  | 3     | 34    | 35   | 3      | 33     | 75357.9512           | 0.0667          |
| 37  | 1     | 36    | 36   | 1      | 35     | 75712.2828           | -0.0477         |
| 37  | 2     | 36    | 36   | 2      | 35     | 75712.2828           | -0.0467         |
| 38  | 0     | 38    | 37   | 0      | 37     | 76076.0093           | -0.0309         |
| 36  | 3     | 33    | 35   | 3      | 32     | 77004.8206           | 0.0049          |
| 37  | 2     | 35    | 36   | 2      | 34     | 77337.1959           | -0.0102         |
| 38  | 2     | 37    | 37   | 2      | 36     | 77692.3888           | -0.0194         |
| 38  | 1     | 37    | 37   | 1      | 36     | 77692.3888           | -0.0199         |
| 39  | 0     | 39    | 38   | 0      | 38     | 78056.243            | -0.0182         |
| 36  | 5     | 32    | 35   | 5      | 31     | 78682.1363           | -0.0154         |
| 38  | 2     | 36    | 37   | 2      | 35     | 79316.5793           | 0.0496          |
| 38  | 3     | 36    | 37   | 3      | 35     | 79316.5793           | 0.0714          |
| 39  | 2     | 38    | 38   | 2      | 37     | 79672.4517           | -0.0125         |
| 39  | 1     | 38    | 38   | 1      | 37     | 79672.4517           | -0.0128         |
| 40  | 0     | 40    | 39   | 0      | 39     | 80036.4667           | 0.0238          |
| 37  | 5     | 33    | 36   | 5      | 32     | 80656.1594           | -0.0091         |

|    |   |    |    |   |    |            |         |
|----|---|----|----|---|----|------------|---------|
| 39 | 3 | 37 | 38 | 3 | 36 | 81295.9385 | 0.0458  |
| 39 | 2 | 37 | 38 | 2 | 36 | 81295.9385 | 0.0334  |
| 40 | 2 | 39 | 39 | 2 | 38 | 81652.5743 | 0.0797  |
| 40 | 1 | 39 | 39 | 1 | 38 | 81652.5743 | 0.0795  |
| 41 | 0 | 41 | 40 | 0 | 40 | 82016.591  | 0.0071  |
| 40 | 2 | 38 | 39 | 2 | 37 | 83275.322  | 0.0028  |
| 40 | 3 | 38 | 39 | 3 | 37 | 83275.322  | 0.0099  |
| 41 | 1 | 40 | 40 | 1 | 39 | 83632.4945 | -0.0023 |
| 41 | 2 | 40 | 40 | 2 | 39 | 83632.4945 | -0.0022 |
| 42 | 0 | 42 | 41 | 0 | 41 | 83996.6514 | -0.0319 |
| 39 | 5 | 35 | 38 | 5 | 34 | 84603.8491 | -0.0166 |
| 41 | 3 | 39 | 40 | 3 | 38 | 85254.7623 | 0.0057  |
| 41 | 2 | 39 | 40 | 2 | 38 | 85254.7623 | 0.0017  |
| 42 | 2 | 41 | 41 | 2 | 40 | 85612.4307 | -0.0373 |
| 42 | 1 | 41 | 41 | 1 | 40 | 85612.4307 | -0.0373 |
| 43 | 0 | 43 | 42 | 0 | 42 | 85976.711  | -0.0287 |
| 40 | 5 | 36 | 39 | 5 | 35 | 86578.0502 | 0.04    |
| 40 | 5 | 36 | 39 | 5 | 35 | 86578.0502 | 0.04    |
| 40 | 4 | 36 | 39 | 4 | 35 | 86581.3793 | -0.0726 |
| 41 | 4 | 38 | 40 | 4 | 37 | 86890.8297 | 0.0869  |
| 41 | 3 | 38 | 40 | 3 | 37 | 86890.8297 | -0.0252 |
| 42 | 3 | 40 | 41 | 3 | 39 | 87234.2286 | 0.0106  |
| 42 | 2 | 40 | 41 | 2 | 39 | 87234.2286 | 0.0084  |
| 43 | 2 | 42 | 42 | 2 | 41 | 87592.3672 | -0.0391 |

|    |   |    |    |   |    |            |         |
|----|---|----|----|---|----|------------|---------|
| 43 | 1 | 42 | 42 | 1 | 41 | 87592.3672 | -0.0391 |
| 44 | 1 | 44 | 43 | 1 | 43 | 87956.8069 | 0.0548  |
| 40 | 6 | 35 | 39 | 6 | 34 | 88283.3572 | -0.0498 |
| 41 | 5 | 37 | 40 | 5 | 36 | 88552.5102 | 0.0171  |
| 41 | 4 | 37 | 40 | 4 | 36 | 88554.5446 | -0.0543 |
| 42 | 3 | 39 | 41 | 3 | 38 | 88868.7854 | -0.0623 |
| 42 | 4 | 39 | 41 | 4 | 38 | 88868.7854 | 0.0032  |
| 43 | 2 | 41 | 42 | 2 | 40 | 89213.7351 | 0.0454  |
| 43 | 3 | 41 | 42 | 3 | 40 | 89213.7351 | 0.0466  |
| 44 | 2 | 43 | 43 | 2 | 42 | 89572.2639 | -0.0455 |
| 44 | 1 | 43 | 43 | 1 | 42 | 89572.2639 | -0.0455 |
| 45 | 0 | 45 | 44 | 0 | 44 | 89936.7361 | 0.0167  |
| 43 | 4 | 40 | 42 | 4 | 39 | 90847.0228 | 0.0664  |
| 44 | 2 | 42 | 43 | 2 | 41 | 91193.1853 | 0.0229  |
| 45 | 2 | 44 | 44 | 2 | 43 | 91552.1484 | -0.0268 |
| 46 | 0 | 46 | 45 | 0 | 45 | 91916.6568 | 0.0163  |
| 42 | 6 | 37 | 41 | 6 | 36 | 92225.1799 | -0.0135 |
| 45 | 3 | 43 | 44 | 3 | 42 | 93172.5638 | -0.0675 |
| 45 | 2 | 43 | 44 | 2 | 42 | 93172.5638 | -0.0679 |
| 46 | 2 | 45 | 45 | 2 | 44 | 93531.9739 | -0.0281 |
| 46 | 1 | 45 | 45 | 1 | 44 | 93531.9739 | -0.0281 |
| 47 | 0 | 47 | 46 | 0 | 46 | 93896.5213 | 0.0072  |
| 43 | 6 | 38 | 42 | 6 | 37 | 94195.6792 | -0.0791 |
| 45 | 4 | 42 | 44 | 4 | 41 | 94803.6828 | 0.0507  |

|    |   |    |    |   |    |            |         |
|----|---|----|----|---|----|------------|---------|
| 45 | 3 | 42 | 44 | 3 | 41 | 94803.6828 | 0.0379  |
| 46 | 2 | 44 | 45 | 2 | 43 | 95152.054  | -0.0385 |
| 46 | 3 | 44 | 45 | 3 | 43 | 95152.054  | -0.0382 |
| 47 | 2 | 46 | 46 | 2 | 45 | 95511.7598 | -0.0281 |
| 47 | 1 | 46 | 46 | 1 | 45 | 95511.7598 | -0.0281 |
| 48 | 0 | 48 | 47 | 0 | 47 | 95876.3546 | 0.0153  |
| 43 | 6 | 37 | 42 | 6 | 36 | 96040.1681 | 0.0334  |
| 44 | 6 | 39 | 43 | 6 | 38 | 96166.5192 | -0.0586 |
| 46 | 4 | 43 | 45 | 4 | 42 | 96782.1216 | 0.0218  |
| 47 | 2 | 45 | 46 | 2 | 44 | 97131.5274 | -0.0122 |
| 47 | 3 | 45 | 46 | 3 | 44 | 97131.5274 | -0.0121 |
| 48 | 1 | 47 | 47 | 1 | 46 | 97491.4896 | -0.0416 |
| 48 | 2 | 47 | 47 | 2 | 46 | 97491.4896 | -0.0416 |
| 49 | 0 | 49 | 48 | 0 | 48 | 97856.1449 | 0.0301  |
| 45 | 6 | 40 | 44 | 6 | 39 | 98137.8077 | -0.017  |
| 48 | 2 | 46 | 47 | 2 | 45 | 99110.9852 | 0.0163  |
| 48 | 3 | 46 | 47 | 3 | 45 | 99110.9852 | 0.0164  |
| 49 | 2 | 48 | 48 | 2 | 47 | 99471.2621 | 0.0317  |
| 49 | 1 | 48 | 48 | 1 | 47 | 99471.2621 | 0.0317  |
| 47 | 4 | 43 | 46 | 4 | 42 | 100406.799 | 0.012   |
| 48 | 3 | 45 | 47 | 3 | 44 | 100739.31  | 0.0849  |
| 48 | 4 | 45 | 47 | 4 | 44 | 100739.31  | 0.0874  |
| 49 | 2 | 47 | 48 | 2 | 46 | 101090.358 | -0.0184 |
| 49 | 3 | 47 | 48 | 3 | 46 | 101090.358 | -0.0183 |



|    |   |    |    |   |    |            |         |
|----|---|----|----|---|----|------------|---------|
| 50 | 1 | 49 | 49 | 1 | 48 | 101450.89  | 0.0062  |
| 50 | 2 | 49 | 49 | 2 | 48 | 101450.89  | 0.0062  |
| 51 | 0 | 51 | 50 | 0 | 50 | 101815.543 | 0.0295  |
| 47 | 6 | 42 | 46 | 6 | 41 | 102081.849 | -0.0278 |
| 48 | 4 | 44 | 47 | 4 | 43 | 102383.458 | 0.0296  |
| 49 | 3 | 46 | 48 | 3 | 45 | 102717.89  | 0.0347  |
| 49 | 4 | 46 | 48 | 4 | 45 | 102717.89  | 0.036   |
| 50 | 3 | 48 | 49 | 3 | 47 | 103069.73  | -0.0275 |
| 50 | 2 | 48 | 49 | 2 | 47 | 103069.73  | -0.0275 |
| 51 | 2 | 50 | 50 | 2 | 49 | 103430.507 | 0.0168  |
| 51 | 1 | 50 | 50 | 1 | 49 | 103430.507 | 0.0168  |
| 52 | 0 | 52 | 51 | 0 | 51 | 103795.205 | 0.0717  |
| 49 | 4 | 45 | 48 | 4 | 44 | 104360.336 | 0.0488  |
| 50 | 4 | 47 | 49 | 4 | 46 | 104696.573 | 0.0548  |
| 51 | 3 | 49 | 50 | 3 | 48 | 105049.087 | -0.0236 |
| 51 | 2 | 49 | 50 | 2 | 48 | 105049.087 | -0.0236 |
| 52 | 2 | 51 | 51 | 2 | 50 | 105409.95  | -0.0969 |
| 53 | 0 | 53 | 52 | 0 | 52 | 105774.673 | -0.0264 |
| 50 | 4 | 46 | 49 | 4 | 45 | 106337.398 | 0.0673  |
| 51 | 3 | 48 | 50 | 3 | 47 | 106675.178 | -0.0277 |
| 51 | 4 | 48 | 50 | 4 | 47 | 106675.178 | -0.0272 |
| 52 | 3 | 50 | 51 | 3 | 49 | 107028.421 | -0.0102 |
| 52 | 2 | 50 | 51 | 2 | 49 | 107028.421 | -0.0102 |
| 53 | 2 | 52 | 52 | 2 | 51 | 107389.627 | 0.0727  |

|    |   |    |    |   |    |            |         |
|----|---|----|----|---|----|------------|---------|
| 53 | 1 | 52 | 52 | 1 | 51 | 107389.627 | 0.0727  |
| 48 | 8 | 41 | 47 | 8 | 40 | 107530.083 | 0.05    |
| 49 | 7 | 43 | 48 | 7 | 42 | 107736.785 | -0.0543 |
| 54 | 0 | 54 | 53 | 0 | 53 | 107754.243 | 0.0318  |
| 51 | 5 | 47 | 50 | 5 | 46 | 108314.48  | -0.0397 |
| 52 | 4 | 49 | 51 | 4 | 48 | 108653.901 | -0.0067 |
| 52 | 3 | 49 | 51 | 3 | 48 | 108653.901 | -0.0069 |
| 53 | 2 | 51 | 52 | 2 | 50 | 109007.688 | -0.0287 |
| 53 | 3 | 51 | 52 | 3 | 50 | 109007.688 | -0.0287 |
| 54 | 2 | 53 | 53 | 2 | 52 | 109368.966 | -0.0442 |
| 54 | 1 | 53 | 53 | 1 | 52 | 109368.966 | -0.0442 |

---

**S7.4 Measured frequencies and residuals (in MHz) for the rotational transitions of the vibrationally excited state  $\nu_{42} + \nu_{41}$  of CHT-1-CN-1 in the frequency range of 75-110 GHz using SP-FIT/SPCAT suite of programs from Pickett.**

| <i>J</i> | <i>K<sub>a</sub></i> | <i>K<sub>c</sub></i> | <i>J'</i> | <i>K'<sub>a</sub></i> | <i>K'<sub>c</sub></i> | Observed Freq. (MHz) | Residuals (MHz) |
|----------|----------------------|----------------------|-----------|-----------------------|-----------------------|----------------------|-----------------|
| 33       | 5                    | 28                   | 32        | 5                     | 27                    | 75116.4924           | 0.0441          |
| 36       | 3                    | 34                   | 35        | 3                     | 33                    | 75387.0013           | 0.0549          |
| 36       | 3                    | 34                   | 35        | 3                     | 33                    | 75387.011            | 0.0647          |
| 36       | 2                    | 34                   | 35        | 2                     | 33                    | 75387.011            | -0.0143         |
| 38       | 1                    | 38                   | 37        | 1                     | 37                    | 76063.9975           | 0.0065          |
| 38       | 1                    | 38                   | 37        | 1                     | 37                    | 76063.9975           | 0.0065          |
| 38       | 1                    | 37                   | 37        | 1                     | 36                    | 77700.2398           | 0.0167          |
| 39       | 0                    | 39                   | 38        | 0                     | 38                    | 78043.643            | -0.0127         |
| 39       | 1                    | 39                   | 38        | 1                     | 38                    | 78043.643            | -0.0127         |
| 38       | 2                    | 36                   | 37        | 2                     | 35                    | 79344.366            | -0.0609         |
| 38       | 3                    | 36                   | 37        | 3                     | 35                    | 79344.3705           | -0.0302         |
| 38       | 2                    | 36                   | 37        | 2                     | 35                    | 79344.3705           | -0.0564         |
| 40       | 0                    | 40                   | 39        | 0                     | 39                    | 80023.297            | 0.0144          |
| 40       | 1                    | 40                   | 39        | 1                     | 39                    | 80023.297            | 0.0144          |
| 38       | 4                    | 35                   | 37        | 4                     | 34                    | 81006.2552           | 0.0637          |
| 39       | 3                    | 37                   | 38        | 3                     | 36                    | 81323.198            | -0.0102         |

|    |   |    |    |   |    |            |         |
|----|---|----|----|---|----|------------|---------|
| 40 | 1 | 39 | 39 | 1 | 38 | 81659.2216 | 0.0234  |
| 41 | 1 | 41 | 40 | 1 | 40 | 82002.875  | 0.0044  |
| 41 | 0 | 41 | 40 | 0 | 40 | 82002.875  | 0.0044  |
| 38 | 5 | 34 | 37 | 5 | 33 | 82699.9711 | -0.0727 |
| 40 | 2 | 38 | 39 | 2 | 37 | 83302.064  | 0.0005  |
| 41 | 1 | 40 | 40 | 1 | 39 | 83638.6536 | 0.0054  |
| 42 | 0 | 42 | 41 | 0 | 41 | 83982.448  | 0.0294  |
| 42 | 1 | 42 | 41 | 1 | 41 | 83982.448  | 0.0294  |
| 38 | 6 | 33 | 37 | 6 | 32 | 84425.9149 | 0.0737  |
| 41 | 3 | 39 | 40 | 3 | 38 | 85280.9454 | 0.0143  |
| 41 | 2 | 39 | 40 | 2 | 38 | 85280.9454 | 0.0094  |
| 43 | 0 | 43 | 42 | 0 | 42 | 85961.9544 | 0.0291  |
| 43 | 1 | 43 | 42 | 1 | 42 | 85961.9544 | 0.0291  |
| 39 | 6 | 34 | 38 | 6 | 33 | 86401.1947 | -0.0222 |
| 38 | 6 | 32 | 37 | 6 | 31 | 86814.892  | 0.0186  |
| 41 | 4 | 38 | 40 | 4 | 37 | 86937.4619 | 0.0666  |
| 41 | 4 | 38 | 40 | 4 | 37 | 86937.4619 | 0.0666  |
| 41 | 3 | 38 | 40 | 3 | 37 | 86937.4619 | -0.0689 |
| 41 | 3 | 38 | 40 | 3 | 37 | 86937.4619 | -0.0689 |
| 43 | 1 | 42 | 42 | 1 | 41 | 87597.458  | -0.0026 |
| 44 | 0 | 44 | 43 | 0 | 43 | 87941.35   | -0.0399 |
| 40 | 6 | 35 | 39 | 6 | 34 | 88373.7341 | 0.0015  |
| 42 | 4 | 39 | 41 | 4 | 38 | 88914.8317 | 0.0122  |
| 42 | 3 | 39 | 41 | 3 | 38 | 88914.8317 | -0.0674 |

|    |   |    |    |   |    |            |         |
|----|---|----|----|---|----|------------|---------|
| 42 | 4 | 39 | 41 | 4 | 38 | 88914.8317 | 0.0122  |
| 44 | 1 | 43 | 43 | 1 | 42 | 89576.752  | -0.0665 |
| 45 | 1 | 45 | 44 | 1 | 44 | 89920.8082 | -0.0028 |
| 45 | 0 | 45 | 44 | 0 | 44 | 89920.8082 | -0.0028 |
| 43 | 4 | 40 | 42 | 4 | 39 | 90892.3842 | -0.0026 |
| 44 | 2 | 42 | 43 | 2 | 41 | 91217.637  | -0.02   |
| 45 | 1 | 44 | 44 | 1 | 43 | 91556.154  | 0.0126  |
| 46 | 1 | 46 | 45 | 1 | 45 | 91900.1886 | 0.0008  |
| 46 | 0 | 46 | 45 | 0 | 45 | 91900.1886 | 0.0008  |
| 43 | 5 | 39 | 42 | 5 | 38 | 92569.1332 | -0.0604 |
| 43 | 4 | 39 | 42 | 4 | 38 | 92570.1266 | -0.0016 |
| 44 | 4 | 41 | 43 | 4 | 40 | 92870.0938 | 0.0164  |
| 44 | 3 | 41 | 43 | 3 | 40 | 92870.096  | -0.0085 |
| 45 | 2 | 43 | 44 | 2 | 42 | 93196.576  | 0.0021  |
| 46 | 2 | 45 | 45 | 2 | 44 | 93535.426  | -0.0016 |
| 46 | 1 | 45 | 45 | 1 | 44 | 93535.426  | -0.0016 |
| 47 | 0 | 47 | 46 | 0 | 46 | 93879.514  | -0.005  |
| 42 | 6 | 36 | 41 | 6 | 35 | 94252.9925 | -0.1114 |
| 45 | 3 | 42 | 44 | 3 | 41 | 94847.8762 | -0.0125 |
| 45 | 4 | 42 | 44 | 4 | 41 | 94847.8762 | 0.0033  |
| 46 | 3 | 44 | 45 | 3 | 43 | 95175.426  | -0.0596 |
| 47 | 1 | 46 | 46 | 1 | 45 | 95514.6659 | -0.0093 |
| 47 | 1 | 46 | 46 | 1 | 45 | 95514.673  | -0.0021 |
| 48 | 1 | 48 | 47 | 1 | 47 | 95858.818  | 0.0144  |

|    |   |    |    |   |    |            |         |
|----|---|----|----|---|----|------------|---------|
| 48 | 1 | 48 | 47 | 1 | 47 | 95858.8203 | 0.0167  |
| 48 | 0 | 48 | 47 | 0 | 47 | 95858.8203 | 0.0167  |
| 46 | 4 | 43 | 45 | 4 | 42 | 96825.7991 | 0.0421  |
| 46 | 3 | 43 | 45 | 3 | 42 | 96825.7991 | 0.0329  |
| 48 | 1 | 47 | 47 | 1 | 46 | 97493.7951 | -0.0873 |
| 48 | 2 | 47 | 47 | 2 | 46 | 97493.82   | -0.0624 |
| 49 | 0 | 49 | 48 | 0 | 48 | 97838.0685 | 0.0279  |
| 49 | 1 | 49 | 48 | 1 | 48 | 97838.0685 | 0.0279  |
| 47 | 4 | 44 | 46 | 4 | 43 | 98803.7284 | 0.0136  |
| 47 | 3 | 44 | 46 | 3 | 43 | 98803.729  | 0.0089  |
| 49 | 1 | 48 | 48 | 1 | 47 | 99473.0408 | -0.0069 |
| 49 | 1 | 48 | 48 | 1 | 47 | 99473.05   | 0.0023  |
| 49 | 2 | 48 | 48 | 2 | 47 | 99473.05   | 0.0023  |
| 50 | 0 | 50 | 49 | 0 | 49 | 99817.2692 | 0.0403  |
| 50 | 1 | 50 | 49 | 1 | 49 | 99817.2692 | 0.0403  |
| 46 | 6 | 41 | 45 | 6 | 40 | 100196.191 | -0.0439 |
| 48 | 3 | 45 | 47 | 3 | 44 | 100781.711 | -0.0252 |
| 48 | 4 | 45 | 47 | 4 | 44 | 100781.753 | 0.02    |
| 49 | 2 | 47 | 48 | 2 | 46 | 101112.149 | 0.0053  |
| 50 | 1 | 49 | 49 | 1 | 48 | 101452.2   | 0.0307  |
| 47 | 6 | 42 | 46 | 6 | 41 | 102167.828 | 0.0882  |
| 48 | 5 | 44 | 47 | 5 | 43 | 102446.66  | 0.0207  |
| 48 | 4 | 44 | 47 | 4 | 43 | 102446.66  | -0.0517 |
| 49 | 3 | 46 | 48 | 3 | 45 | 102759.784 | -0.0181 |

|    |   |    |    |   |    |            |         |
|----|---|----|----|---|----|------------|---------|
| 50 | 2 | 48 | 49 | 2 | 47 | 103090.974 | -0.0161 |
| 51 | 2 | 50 | 50 | 2 | 49 | 103431.218 | -0.0287 |
| 51 | 1 | 50 | 50 | 1 | 49 | 103431.25  | 0.0031  |
| 49 | 5 | 45 | 48 | 5 | 44 | 104422.892 | 0.0026  |
| 50 | 4 | 47 | 49 | 4 | 46 | 104737.935 | 0.0295  |
| 50 | 3 | 47 | 49 | 3 | 46 | 104737.937 | 0.0301  |
| 51 | 2 | 49 | 50 | 2 | 48 | 105069.784 | -0.0266 |
| 53 | 0 | 53 | 52 | 0 | 52 | 105754.495 | 0.0038  |
| 53 | 1 | 53 | 52 | 1 | 52 | 105754.495 | 0.0038  |
| 50 | 4 | 46 | 49 | 4 | 45 | 106399.364 | 0.0121  |
| 51 | 4 | 48 | 50 | 4 | 47 | 106716.08  | 0.0397  |
| 51 | 3 | 48 | 50 | 3 | 47 | 106716.104 | 0.0632  |
| 54 | 0 | 54 | 53 | 0 | 53 | 107733.505 | 0.0309  |
| 51 | 4 | 47 | 50 | 4 | 46 | 108376.001 | 0.0613  |
| 52 | 4 | 49 | 51 | 4 | 48 | 108694.172 | -0.0235 |
| 53 | 2 | 51 | 52 | 2 | 50 | 109027.321 | -0.041  |
| 54 | 2 | 53 | 53 | 2 | 52 | 109368.146 | -0.048  |
| 54 | 1 | 53 | 53 | 1 | 52 | 109368.199 | 0.0046  |

---

**S7.5 Measured frequencies and residuals (in MHz) for the rotational transitions of the vibrationally excited state  $2\nu_{38}$  of CHT-1-CN-1 in the frequency range of 75-110 GHz using SPFIT/SPCAT suite of programs from Pickett.**

| <i>J</i> | <i>K<sub>a</sub></i> | <i>K<sub>c</sub></i> | <i>J'</i> | <i>K'<sub>a</sub></i> | <i>K'<sub>c</sub></i> | Observed Freq. (MHz) | Residuals (MHz) |
|----------|----------------------|----------------------|-----------|-----------------------|-----------------------|----------------------|-----------------|
| 37       | 1                    | 36                   | 36        | 1                     | 35                    | 75695.1736           | -0.0132         |
| 37       | 2                    | 36                   | 36        | 2                     | 35                    | 75695.1736           | -0.0123         |
| 38       | 1                    | 38                   | 37        | 1                     | 37                    | 76065.6625           | -0.0163         |
| 38       | 0                    | 38                   | 37        | 0                     | 37                    | 76065.6625           | -0.0163         |
| 37       | 2                    | 35                   | 36        | 2                     | 34                    | 77312.9624           | -0.0569         |
| 38       | 1                    | 37                   | 37        | 1                     | 36                    | 77675.0574           | -0.0185         |
| 38       | 2                    | 37                   | 37        | 2                     | 36                    | 77675.0574           | -0.018          |
| 39       | 1                    | 39                   | 38        | 1                     | 38                    | 78045.7305           | 0.0189          |
| 39       | 0                    | 39                   | 38        | 0                     | 38                    | 78045.7305           | 0.0189          |
| 39       | 1                    | 38                   | 38        | 1                     | 37                    | 79654.9576           | 0.0158          |
| 39       | 2                    | 38                   | 38        | 2                     | 37                    | 79654.9576           | 0.016           |
| 40       | 1                    | 40                   | 39        | 1                     | 39                    | 80025.7098           | 0.0053          |
| 40       | 0                    | 40                   | 39        | 0                     | 39                    | 80025.7098           | 0.0053          |
| 40       | 1                    | 39                   | 39        | 1                     | 38                    | 81634.7813           | -0.0003         |
| 40       | 1                    | 39                   | 39        | 1                     | 38                    | 81634.7813           | -0.0003         |



|    |   |    |    |   |    |            |         |
|----|---|----|----|---|----|------------|---------|
| 41 | 1 | 41 | 40 | 1 | 40 | 82005.6415 | -0.015  |
| 41 | 0 | 41 | 40 | 0 | 40 | 82005.6415 | -0.015  |
| 40 | 2 | 38 | 39 | 2 | 37 | 83250.598  | 0.026   |
| 41 | 2 | 40 | 40 | 2 | 39 | 83614.5592 | -0.033  |
| 41 | 1 | 40 | 40 | 1 | 39 | 83614.5592 | -0.0331 |
| 42 | 1 | 42 | 41 | 1 | 41 | 83985.5571 | -0.0089 |
| 42 | 0 | 42 | 41 | 0 | 41 | 83985.5571 | -0.0089 |
| 41 | 2 | 39 | 40 | 2 | 38 | 85229.8366 | 0.0127  |
| 41 | 3 | 39 | 40 | 3 | 38 | 85229.8366 | 0.0166  |
| 42 | 2 | 41 | 41 | 2 | 40 | 85594.3759 | 0.0042  |
| 42 | 1 | 41 | 41 | 1 | 40 | 85594.3759 | 0.0041  |
| 43 | 1 | 43 | 42 | 1 | 42 | 85965.485  | 0.0527  |
| 43 | 0 | 43 | 42 | 0 | 42 | 85965.485  | 0.0527  |
| 41 | 4 | 38 | 40 | 4 | 37 | 86858.6466 | -0.0053 |
| 42 | 3 | 40 | 41 | 3 | 39 | 87209.1136 | 0.023   |
| 42 | 2 | 40 | 41 | 2 | 39 | 87209.1136 | 0.0209  |
| 43 | 2 | 42 | 42 | 2 | 41 | 87574.1518 | 0.0344  |
| 43 | 1 | 42 | 42 | 1 | 41 | 87574.1518 | 0.0344  |
| 44 | 0 | 44 | 43 | 0 | 43 | 87945.2748 | 0.0209  |
| 44 | 1 | 44 | 43 | 1 | 43 | 87945.2748 | 0.0209  |
| 42 | 4 | 39 | 41 | 4 | 38 | 88836.4729 | -0.0368 |
| 42 | 4 | 39 | 41 | 4 | 38 | 88836.4729 | -0.0368 |
| 43 | 3 | 41 | 42 | 3 | 40 | 89188.3809 | 0.0117  |
| 43 | 2 | 41 | 42 | 2 | 40 | 89188.3809 | 0.0105  |

|    |   |    |    |   |    |            |         |
|----|---|----|----|---|----|------------|---------|
| 45 | 1 | 45 | 44 | 1 | 44 | 89925.0282 | -0.0017 |
| 45 | 0 | 45 | 44 | 0 | 44 | 89925.0282 | -0.0017 |
| 44 | 3 | 42 | 43 | 3 | 41 | 91167.6653 | 0.016   |
| 44 | 2 | 42 | 43 | 2 | 41 | 91167.6653 | 0.0153  |
| 45 | 1 | 44 | 44 | 1 | 43 | 91533.4859 | -0.0133 |
| 45 | 2 | 44 | 44 | 2 | 43 | 91533.4859 | -0.0132 |
| 46 | 0 | 46 | 45 | 0 | 45 | 91904.7793 | 0.0203  |
| 46 | 1 | 46 | 45 | 1 | 45 | 91904.7793 | 0.0203  |
| 44 | 4 | 41 | 43 | 4 | 40 | 92792.5633 | -0.0399 |
| 45 | 2 | 43 | 44 | 2 | 42 | 93146.9167 | -0.0085 |
| 45 | 3 | 43 | 44 | 3 | 42 | 93146.9167 | -0.0081 |
| 46 | 1 | 45 | 45 | 1 | 44 | 93513.1137 | -0.0176 |
| 46 | 2 | 45 | 45 | 2 | 44 | 93513.1137 | -0.0176 |
| 47 | 1 | 47 | 46 | 1 | 46 | 93884.3991 | -0.0412 |
| 47 | 0 | 47 | 46 | 0 | 46 | 93884.3991 | -0.0412 |
| 45 | 3 | 42 | 44 | 3 | 41 | 94770.7559 | -0.058  |
| 46 | 3 | 44 | 45 | 3 | 43 | 95126.1974 | 0.0068  |
| 47 | 2 | 46 | 46 | 2 | 45 | 95492.6895 | -0.0324 |
| 47 | 1 | 46 | 46 | 1 | 45 | 95492.6895 | -0.0324 |
| 48 | 1 | 48 | 47 | 1 | 47 | 95864.0839 | 0.0115  |
| 48 | 0 | 48 | 47 | 0 | 47 | 95864.0839 | 0.0115  |
| 46 | 3 | 43 | 45 | 3 | 42 | 96749.1604 | 0.074   |
| 47 | 3 | 45 | 46 | 3 | 44 | 97105.4494 | 0.0076  |
| 47 | 2 | 45 | 46 | 2 | 44 | 97105.4494 | 0.0075  |

|    |   |    |    |   |    |            |         |
|----|---|----|----|---|----|------------|---------|
| 48 | 2 | 47 | 47 | 2 | 46 | 97472.2273 | -0.0419 |
| 48 | 1 | 47 | 47 | 1 | 46 | 97472.2273 | -0.0419 |
| 49 | 0 | 49 | 48 | 0 | 48 | 97843.6917 | 0.0372  |
| 49 | 1 | 49 | 48 | 1 | 48 | 97843.6917 | 0.0372  |
| 47 | 4 | 44 | 46 | 4 | 43 | 98727.4281 | 0.0059  |
| 47 | 4 | 44 | 46 | 4 | 43 | 98727.4281 | 0.0059  |
| 49 | 2 | 48 | 48 | 2 | 47 | 99451.7498 | -0.0218 |
| 49 | 1 | 48 | 48 | 1 | 47 | 99451.7498 | -0.0218 |
| 50 | 1 | 50 | 49 | 1 | 49 | 99823.1712 | -0.014  |
| 50 | 0 | 50 | 49 | 0 | 49 | 99823.1712 | -0.014  |
| 48 | 4 | 45 | 47 | 4 | 44 | 100705.888 | 0.0703  |
| 49 | 3 | 47 | 48 | 3 | 46 | 101063.886 | 0.0026  |
| 49 | 2 | 47 | 48 | 2 | 46 | 101063.886 | 0.0025  |
| 51 | 1 | 51 | 50 | 1 | 50 | 101802.708 | 0.0441  |
| 51 | 0 | 51 | 50 | 0 | 50 | 101802.708 | 0.0441  |
| 49 | 4 | 46 | 48 | 4 | 45 | 102684.322 | 0.0679  |
| 50 | 3 | 48 | 49 | 3 | 47 | 103043.06  | -0.0054 |
| 50 | 2 | 48 | 49 | 2 | 47 | 103043.06  | -0.0055 |
| 52 | 0 | 52 | 51 | 0 | 51 | 103782.099 | 0.0108  |
| 51 | 2 | 49 | 50 | 2 | 48 | 105022.217 | -0.0016 |
| 51 | 3 | 49 | 50 | 3 | 48 | 105022.217 | -0.0016 |
| 53 | 0 | 53 | 52 | 0 | 52 | 105761.418 | -0.0406 |
| 53 | 1 | 53 | 52 | 1 | 52 | 105761.418 | -0.0406 |
| 52 | 3 | 50 | 51 | 3 | 49 | 107001.325 | -0.0131 |

|    |   |    |    |   |    |            |         |
|----|---|----|----|---|----|------------|---------|
| 52 | 2 | 50 | 51 | 2 | 49 | 107001.325 | -0.0131 |
| 53 | 2 | 52 | 52 | 2 | 51 | 107369.311 | 0.0101  |
| 53 | 1 | 52 | 52 | 1 | 51 | 107369.311 | 0.0101  |
| 54 | 0 | 54 | 53 | 0 | 53 | 107740.776 | 0.0026  |
| 54 | 1 | 54 | 53 | 1 | 53 | 107740.776 | 0.0026  |
| 53 | 3 | 51 | 52 | 3 | 50 | 108980.427 | 0.006   |
| 53 | 2 | 51 | 52 | 2 | 50 | 108980.427 | 0.006   |
| 54 | 1 | 53 | 53 | 1 | 52 | 109348.536 | -0.0204 |
| 54 | 2 | 53 | 53 | 2 | 52 | 109348.536 | -0.0204 |

---

**S7.6 Measured frequencies and residuals (in MHz) for the rotational transitions of the vibrationally excited state  $2\nu_{40}$  of CHT-1-CN-1 in the frequency range of 75-110 GHz using SPFIT/SPCAT suite of programs from Pickett.**

| <i>J</i> | <i>K<sub>a</sub></i> | <i>K<sub>c</sub></i> | <i>J'</i> | <i>K'<sub>a</sub></i> | <i>K'<sub>c</sub></i> | Observed Freq. (MHz) | Residuals (MHz) |
|----------|----------------------|----------------------|-----------|-----------------------|-----------------------|----------------------|-----------------|
| 37       | 2                    | 36                   | 36        | 2                     | 35                    | 75714.9051           | -0.06           |
| 37       | 1                    | 36                   | 36        | 1                     | 35                    | 75714.9051           | -0.0612         |
| 38       | 1                    | 38                   | 37        | 1                     | 37                    | 76058.3251           | -0.0266         |
| 38       | 0                    | 38                   | 37        | 0                     | 37                    | 76058.3251           | -0.0267         |
| 37       | 2                    | 35                   | 36        | 2                     | 34                    | 77359.8604           | 0.1321          |
| 37       | 3                    | 35                   | 36        | 3                     | 34                    | 77359.8604           | 0.1788          |
| 38       | 1                    | 37                   | 37        | 1                     | 36                    | 77694.2943           | -0.0735         |
| 38       | 2                    | 37                   | 37        | 2                     | 36                    | 77694.2943           | -0.0728         |
| 39       | 1                    | 39                   | 38        | 1                     | 38                    | 78037.8685           | -0.0172         |
| 39       | 0                    | 39                   | 38        | 0                     | 38                    | 78037.8685           | -0.0172         |
| 38       | 3                    | 36                   | 37        | 3                     | 35                    | 79338.3383           | 0.0053          |
| 38       | 2                    | 36                   | 37        | 2                     | 35                    | 79338.3383           | -0.0216         |
| 39       | 2                    | 38                   | 38        | 2                     | 37                    | 79673.6915           | -0.0585         |
| 40       | 1                    | 40                   | 39        | 1                     | 39                    | 80017.3619           | -0.0207         |
| 40       | 0                    | 40                   | 39        | 0                     | 39                    | 80017.3619           | -0.0207         |
| 39       | 2                    | 37                   | 38        | 2                     | 36                    | 81317.0504           | -0.001          |

|    |   |    |    |   |    |            |         |
|----|---|----|----|---|----|------------|---------|
| 39 | 3 | 37 | 38 | 3 | 36 | 81317.0504 | 0.0144  |
| 40 | 2 | 39 | 39 | 2 | 38 | 81653.0467 | -0.064  |
| 41 | 1 | 41 | 40 | 1 | 40 | 81996.891  | 0.0495  |
| 41 | 0 | 41 | 40 | 0 | 40 | 81996.891  | 0.0495  |
| 40 | 3 | 38 | 39 | 3 | 37 | 83295.7155 | -0.0644 |
| 41 | 1 | 40 | 40 | 1 | 39 | 83632.4945 | 0.0477  |
| 41 | 2 | 40 | 40 | 2 | 39 | 83632.4945 | 0.0478  |
| 41 | 3 | 39 | 40 | 3 | 38 | 85274.5024 | -0.0528 |
| 41 | 2 | 39 | 40 | 2 | 38 | 85274.5024 | -0.0578 |
| 42 | 1 | 41 | 41 | 1 | 40 | 85611.8575 | 0.1021  |
| 42 | 2 | 41 | 41 | 2 | 40 | 85611.8575 | 0.1021  |
| 42 | 2 | 40 | 41 | 2 | 39 | 87253.3597 | 0.0036  |
| 42 | 3 | 40 | 41 | 3 | 39 | 87253.3597 | 0.0065  |
| 42 | 3 | 39 | 41 | 3 | 38 | 88908.232  | -0.0533 |
| 43 | 2 | 41 | 42 | 2 | 40 | 89232.2333 | 0.0653  |
| 43 | 3 | 41 | 42 | 3 | 40 | 89232.2333 | 0.0669  |
| 43 | 3 | 40 | 42 | 3 | 39 | 90885.7282 | -0.0039 |
| 46 | 1 | 46 | 45 | 1 | 45 | 91893.5988 | 0.0735  |
| 46 | 0 | 46 | 45 | 0 | 45 | 91893.5988 | 0.0735  |
| 44 | 3 | 41 | 43 | 3 | 40 | 92863.3308 | 0.0122  |
| 47 | 0 | 47 | 46 | 0 | 46 | 93872.7502 | 0.0177  |
| 47 | 1 | 47 | 46 | 1 | 46 | 93872.7502 | 0.0177  |
| 48 | 1 | 48 | 47 | 1 | 47 | 95851.9017 | 0.0077  |
| 48 | 0 | 48 | 47 | 0 | 47 | 95851.9017 | 0.0077  |

|    |   |    |    |   |    |            |         |
|----|---|----|----|---|----|------------|---------|
| 49 | 1 | 49 | 48 | 1 | 48 | 97831.0036 | -0.0052 |
| 49 | 0 | 49 | 48 | 0 | 48 | 97831.0036 | -0.0052 |
| 49 | 2 | 48 | 48 | 2 | 47 | 99465.9982 | 0.0197  |
| 49 | 1 | 48 | 48 | 1 | 47 | 99465.9982 | 0.0197  |
| 50 | 1 | 49 | 49 | 1 | 48 | 101444.947 | -0.0511 |
| 51 | 0 | 51 | 50 | 0 | 50 | 101789.178 | 0.0838  |
| 51 | 1 | 51 | 50 | 1 | 50 | 101789.178 | 0.0838  |
| 51 | 1 | 50 | 50 | 1 | 49 | 103423.974 | 0       |
| 52 | 0 | 52 | 51 | 0 | 51 | 103768.04  | -0.022  |
| 52 | 1 | 52 | 51 | 1 | 51 | 103768.04  | -0.022  |
| 51 | 3 | 49 | 50 | 3 | 48 | 105062.609 | 0.0872  |
| 51 | 2 | 49 | 50 | 2 | 48 | 105062.609 | 0.0872  |
| 52 | 1 | 51 | 51 | 1 | 50 | 105402.852 | -0.0525 |
| 53 | 0 | 53 | 52 | 0 | 52 | 105746.958 | -0.0223 |
| 53 | 1 | 53 | 52 | 1 | 52 | 105746.958 | -0.0223 |
| 53 | 0 | 53 | 52 | 0 | 52 | 105746.958 | -0.0223 |
| 52 | 2 | 50 | 51 | 2 | 49 | 107041.228 | -0.0048 |
| 52 | 3 | 50 | 51 | 3 | 49 | 107041.228 | -0.0048 |
| 53 | 1 | 52 | 52 | 1 | 51 | 107381.736 | -0.0528 |
| 54 | 1 | 54 | 53 | 1 | 53 | 107725.837 | -0.0087 |
| 54 | 0 | 54 | 53 | 0 | 53 | 107725.837 | -0.0087 |
| 54 | 2 | 53 | 53 | 2 | 52 | 109360.632 | 0.0065  |
| 54 | 1 | 53 | 53 | 1 | 52 | 109360.632 | 0.0065  |

---

## References

- D. Schmitz, V. A. Shubert, T. Betz and M. Schnell, *Journal of Molecular Spectroscopy*, 2012, **280**, 77–84.
- C. Pérez, A. Krin, A. L. Steber, J. C. López, Z. Kisiel and M. Schnell, *The Journal of Physical Chemistry Letters*, 2016, **7**, 154–160.
- M. Fatima, C. Pérez, B. E. Arenas, M. Schnell and A. L. Steber, *Physical Chemistry Chemical Physics*, 2020, **22**, 17042–17051.
- J. L. Neill, B. J. Harris, A. L. Steber, K. O. Douglass, D. F. Plusquellic and B. H. Pate, *Optics Express*, 2013, **21**, 19743.
- B. E. Arenas, S. Gruet, A. L. Steber, B. M. Giuliano and M. Schnell, *Physical Chemistry Chemical Physics*, 2017, **19**, 1751–1756.
